# Supplementary material for: Omicron: a chimera of two early SARS-CoV-2 lineages
Source: Signal Transduct Target Ther. 2022 Mar 17;7:90. doi: 10.1038/s41392-022-00949-5 (PMC8927754; doi:10.1038/s41392-022-00949-5)
Supplement: Supplementary file 2 — Table S1. Information of VOCs, VOIs, VUMs and FMVs of SARS-CoV-2 retrieval from GISAID [file 41392_2022_949_MOESM2_ESM.xlsx]

## Sheet: ex_info
Type	WHO_Label	Pango_Lineage	GISAID_Clade	strain	virus	gisaid_epi_isl	date	country	division	length	host	age	sex
VOC	Alpha	B.1.1.7	GRY	hCoV-19/England/MILK-B14675/2020	betacoronavirus	EPI_ISL_2735399	2020-10-23	United Kingdom	England	29802	Human	unknown	unknown
VOC	Alpha	B.1.1.7	GRY	hCoV-19/England/MILK-B15586/2020	betacoronavirus	EPI_ISL_2735529	2020-10-23	United Kingdom	England	29821	Human	unknown	unknown
VOC	Alpha	B.1.1.7	GRY	hCoV-19/England/MILK-B16743/2020	betacoronavirus	EPI_ISL_2735566	2020-10-23	United Kingdom	England	29819	Human	unknown	unknown
VOC	Alpha	B.1.1.7	GRY	hCoV-19/England/WSFT-25C5743/2020	betacoronavirus	EPI_ISL_2751540	2020-10-21	United Kingdom	England	29810	Human	unknown	unknown
VOC	Alpha	B.1.1.7	GRY	hCoV-19/England/MILK-9E2FE0/2020	betacoronavirus	EPI_ISL_581117	2020-09-21	United Kingdom	England	29764	Human	unknown	unknown
VOC	Alpha	B.1.1.7	GRY	hCoV-19/England/CAMC-A58BA4/2020	betacoronavirus	EPI_ISL_596982	2020-10-08	United Kingdom	England	29763	Human	unknown	unknown
VOC	Alpha	B.1.1.7	GRY	hCoV-19/England/MILK-A06B0F/2020	betacoronavirus	EPI_ISL_599956	2020-10-01	United Kingdom	England	29764	Human	unknown	unknown
VOC	Alpha	B.1.1.7	GRY	hCoV-19/England/MILK-A06237/2020	betacoronavirus	EPI_ISL_600093	2020-09-30	United Kingdom	England	29764	Human	unknown	unknown
VOC	Alpha	B.1.1.7	GRY	hCoV-19/England/MILK-9E05B3/2020	betacoronavirus	EPI_ISL_601443	2020-09-20	United Kingdom	England	29764	Human	unknown	unknown
VOC	Alpha	B.1.1.7	GRY	hCoV-19/England/MILK-A7C3B1/2020	betacoronavirus	EPI_ISL_606375	2020-10-15	United Kingdom	England	29763	Human	unknown	unknown
VOC	Alpha	B.1.1.7	GRY	hCoV-19/England/MILK-A7A7A8/2020	betacoronavirus	EPI_ISL_606424	2020-10-15	United Kingdom	England	29763	Human	unknown	unknown
VOC	Alpha	B.1.1.7	GRY	hCoV-19/England/CAMC-A659AA/2020	betacoronavirus	EPI_ISL_608363	2020-10-11	United Kingdom	England	29763	Human	unknown	unknown
VOC	Alpha	B.1.1.7	GRY	hCoV-19/England/MILK-ABB705/2020	betacoronavirus	EPI_ISL_623224	2020-10-21	United Kingdom	England	29763	Human	unknown	unknown
VOC	Alpha	B.1.1.7	GRY	hCoV-19/England/MILK-AB78BB/2020	betacoronavirus	EPI_ISL_623594	2020-10-21	United Kingdom	England	29763	Human	unknown	unknown
VOC	Alpha	B.1.1.7	GRY	hCoV-19/England/MILK-AC94C1/2020	betacoronavirus	EPI_ISL_629120	2020-10-21	United Kingdom	England	29763	Human	unknown	unknown
VOC	Alpha	B.1.1.7	GRY	hCoV-19/England/MILK-AC92A9/2020	betacoronavirus	EPI_ISL_629311	2020-10-21	United Kingdom	England	29763	Human	unknown	unknown
VOC	Alpha	B.1.1.7	GRY	hCoV-19/England/MILK-AC8644/2020	betacoronavirus	EPI_ISL_629323	2020-10-21	United Kingdom	England	29763	Human	unknown	unknown
VOC	Alpha	B.1.1.7	GRY	hCoV-19/England/MILK-AC8680/2020	betacoronavirus	EPI_ISL_629408	2020-10-21	United Kingdom	England	29763	Human	unknown	unknown
VOC	Alpha	B.1.1.7	GRY	hCoV-19/England/MILK-ACF9CC/2020	betacoronavirus	EPI_ISL_629440	2020-10-22	United Kingdom	England	29763	Human	unknown	unknown
VOC	Alpha	B.1.1.7	GRY	hCoV-19/England/MILK-ACEB30/2020	betacoronavirus	EPI_ISL_629466	2020-10-21	United Kingdom	England	29763	Human	unknown	unknown
VOC	Alpha	B.1.1.7	GRY	hCoV-19/England/MILK-ACEB7C/2020	betacoronavirus	EPI_ISL_629559	2020-10-22	United Kingdom	England	29763	Human	unknown	unknown
VOC	Alpha	B.1.1.7	GRY	hCoV-19/England/MILK-ACEAF7/2020	betacoronavirus	EPI_ISL_629597	2020-10-21	United Kingdom	England	29763	Human	unknown	unknown
VOC	Alpha	B.1.1.7	GRY	hCoV-19/England/MILK-ACEB21/2020	betacoronavirus	EPI_ISL_629665	2020-10-21	United Kingdom	England	29763	Human	unknown	unknown
VOC	Alpha	B.1.1.7	GRY	hCoV-19/England/MILK-ACEF9E/2020	betacoronavirus	EPI_ISL_629703	2020-10-21	United Kingdom	England	29763	Human	unknown	unknown
VOC	Alpha	B.1.1.7	GRY	hCoV-19/England/MILK-ACEAD9/2020	betacoronavirus	EPI_ISL_629723	2020-10-22	United Kingdom	England	29763	Human	unknown	unknown
VOC	Alpha	B.1.1.7	GRY	hCoV-19/England/MILK-ACEB9A/2020	betacoronavirus	EPI_ISL_629739	2020-10-22	United Kingdom	England	29763	Human	unknown	unknown
VOC	Alpha	B.1.1.7	GRY	hCoV-19/England/CAMC-AEB05C/2020	betacoronavirus	EPI_ISL_633108	2020-10-25	United Kingdom	England	29763	Human	unknown	unknown
VOC	Alpha	B.1.1.7	GRY	hCoV-19/England/QEUH-AE22C8/2020	betacoronavirus	EPI_ISL_633642	2020-10-26	United Kingdom	England	29763	Human	unknown	unknown
VOC	Alpha	B.1.1.7	GRY	hCoV-19/England/MILK-ACCBAB/2020	betacoronavirus	EPI_ISL_634338	2020-10-21	United Kingdom	England	29763	Human	unknown	unknown
VOC	Alpha	B.1.1.7	GRY	hCoV-19/England/MILK-AC7C8F/2020	betacoronavirus	EPI_ISL_634385	2020-10-22	United Kingdom	England	29765	Human	unknown	unknown
VOC	Alpha	B.1.1.7	GRY	hCoV-19/England/MILK-AC7C43/2020	betacoronavirus	EPI_ISL_634406	2020-10-22	United Kingdom	England	29765	Human	unknown	unknown
VOC	Alpha	B.1.1.7	GRY	hCoV-19/England/MILK-AC7A3A/2020	betacoronavirus	EPI_ISL_634447	2020-10-21	United Kingdom	England	29763	Human	unknown	unknown
VOC	Alpha	B.1.1.7	GRY	hCoV-19/England/MILK-ACC701/2020	betacoronavirus	EPI_ISL_634480	2020-10-21	United Kingdom	England	29763	Human	unknown	unknown
VOC	Alpha	B.1.1.7	GRY	hCoV-19/England/MILK-B01F52/2020	betacoronavirus	EPI_ISL_642868	2020-10-23	United Kingdom	England	29763	Human	unknown	unknown
VOC	Alpha	B.1.1.7	GRY	hCoV-19/England/MILK-B0213D/2020	betacoronavirus	EPI_ISL_642938	2020-10-24	United Kingdom	England	29763	Human	unknown	unknown
VOC	Alpha	B.1.1.7	GRY	hCoV-19/England/MILK-B01F70/2020	betacoronavirus	EPI_ISL_643006	2020-10-23	United Kingdom	England	29763	Human	unknown	unknown
VOC	Alpha	B.1.1.7	GRY	hCoV-19/England/MILK-B01F43/2020	betacoronavirus	EPI_ISL_643020	2020-10-23	United Kingdom	England	29763	Human	unknown	unknown
VOC	Alpha	B.1.1.7	GRY	hCoV-19/England/MILK-B02FF7/2020	betacoronavirus	EPI_ISL_651079	2020-10-26	United Kingdom	England	29763	Human	unknown	unknown
VOC	Alpha	B.1.1.7	GRY	hCoV-19/England/MILK-B045E4/2020	betacoronavirus	EPI_ISL_651080	2020-10-24	United Kingdom	England	29763	Human	unknown	unknown
VOC	Alpha	B.1.1.7	GRY	hCoV-19/England/MILK-B0460F/2020	betacoronavirus	EPI_ISL_651081	2020-10-24	United Kingdom	England	29763	Human	unknown	unknown
VOC	Alpha	B.1.1.7	GRY	hCoV-19/England/MILK-B065A6/2020	betacoronavirus	EPI_ISL_651082	2020-10-24	United Kingdom	England	29818	Human	unknown	unknown
VOC	Beta	B.1.351	GH/501Y.V2	hCoV-19/SouthAfrica/NICD-N19828/2020	betacoronavirus	EPI_ISL_6693552	2020-06-26	South Africa	NORTH WEST	29760	Human	78	Female
VOC	Delta	B.1.617.2	G	hCoV-19/India/DL-ILBS-67122/2020	betacoronavirus	EPI_ISL_3276988	2020-11-06	India	Delhi	29817	Human	16	Male
VOC	Delta	B.1.617.2	GR	hCoV-19/India/DL-ILBS-69086/2020	betacoronavirus	EPI_ISL_3276995	2020-11-10	India	Delhi	29349	Human	8	Male
VOC	Delta	B.1.617.2	GK	hCoV-19/India/DL-ILBS-111886/2021	betacoronavirus	EPI_ISL_3277085	2021-01-05	India	Delhi	29793	Human	23	Male
VOC	Delta	B.1.617.2	GK	hCoV-19/India/RJ-CCMB-CIA6150/2020	betacoronavirus	EPI_ISL_3453581	2020-10-23	India	Rajasthan	29803	Human	40	Male
VOC	Delta	B.1.617.2	GK	hCoV-19/India/RJ-CCMB-CIA6164/2020	betacoronavirus	EPI_ISL_3453628	2020-10-29	India	Rajasthan	29782	Human	43	Male
VOC	Delta	B.1.617.2	GK	hCoV-19/India/MH-ICMR-MCL_5728_5784/2020	betacoronavirus	EPI_ISL_3473614	2020-11-01	India	Maharashtra	29875	Human	4	Male
VOC	Delta	B.1.617.2	GK	hCoV-19/India/MH-ICMR-MCL_5723_5777/2020	betacoronavirus	EPI_ISL_3473618	2020-11-01	India	Maharashtra	29900	Human	14	Female
VOC	Delta	B.1.617.2	GK	hCoV-19/India/MH-ICMR-MCL_5715_5771/2020	betacoronavirus	EPI_ISL_3473623	2020-10-01	India	Maharashtra	29886	Human	17	Female
VOC	Delta	B.1.617.2	GR	hCoV-19/India/DL-ILBS-78630/2020	betacoronavirus	EPI_ISL_6097919	2020-11-29	India	Delhi	29769	Human	13	Female
VOC	Delta	B.1.617.2	GR	hCoV-19/India/DL-ILBS-79481/2020	betacoronavirus	EPI_ISL_6097920	2020-12-02	India	Delhi	29814	Human	15	Female
VOC	Delta	B.1.617.2	G	hCoV-19/India/DL-ILBS-67430/2020	betacoronavirus	EPI_ISL_6097922	2020-11-08	India	Delhi	29799	Human	6	Male
VOC	Delta	B.1.617.2	G	hCoV-19/India/DL-ILBS-65379/2020	betacoronavirus	EPI_ISL_6097924	2020-11-03	India	Delhi	29783	Human	14	Male
VOC	Delta	B.1.617.2	G	hCoV-19/India/TG-RFCH01944_CIB5682/2020	betacoronavirus	EPI_ISL_7734730	2020-12-11	India	Telangana	29736	Human	19	Female
VOC	Delta	B.1.617.2	G	hCoV-19/India/TG-RFCH01999_CIB6027/2020	betacoronavirus	EPI_ISL_7735082	2020-11-18	India	Telangana	29611	Human	78	Male
VOC	Gamma	P.1	GR/501Y.V3	hCoV-19/Brazil/AM-FIOCRUZ-20843185MR/2020	betacoronavirus	EPI_ISL_1068149	2020-12-18	Brazil	Amazonas	29784	Human	43	Male
VOC	Gamma	P.1	GR/501Y.V3	hCoV-19/Brazil/AM-FIOCRUZ-20843187NC/2020	betacoronavirus	EPI_ISL_1068150	2020-12-18	Brazil	Amazonas	29784	Human	70	Male
VOC	Gamma	P.1	GR/501Y.V3	hCoV-19/Brazil/AM-FIOCRUZ-20843198JS/2020	betacoronavirus	EPI_ISL_1068151	2020-12-21	Brazil	Amazonas	29743	Human	50	Male
VOC	Gamma	P.1	GR/501Y.V3	hCoV-19/Brazil/AM-FIOCRUZ-20892199FT/2020	betacoronavirus	EPI_ISL_1068221	2020-12-21	Brazil	Amazonas	29784	Human	48	Male
VOC	Gamma	P.1	GR/501Y.V3	hCoV-19/Brazil/AM-FIOCRUZ-20895217CM/2020	betacoronavirus	EPI_ISL_1068249	2020-12-22	Brazil	Amazonas	29784	Human	56	Female
VOC	Gamma	P.1	GR/501Y.V3	hCoV-19/Brazil/RS-LMM38991/2020	betacoronavirus	EPI_ISL_1630158	2020-11-30	Brazil	Rio Grande do Sul	29802	Human	39	Male
VOC	Gamma	P.1	GR/501Y.V3	hCoV-19/Brazil/AM-M1-CAMPI231I/2020	betacoronavirus	EPI_ISL_1708318	2020-12-21	Brazil	Amazonas	29773	Human	28	Male
VOC	Gamma	P.1	GR/501Y.V3	hCoV-19/Brazil/SP-2389/2020	betacoronavirus	EPI_ISL_1821208	2020-11-03	Brazil	Sao Paulo	29837	Human	94	Female
VOC	Gamma	P.1	GR/501Y.V3	hCoV-19/Brazil/AM-CD1739/2020	betacoronavirus	EPI_ISL_2233906	2020-12-21	Brazil	Amazonas	29866	Human	unknown	unknown
VOC	Gamma	P.1	GR/501Y.V3	hCoV-19/Brazil/RJ-FUNED-330105720/2020	betacoronavirus	EPI_ISL_2249440	2020-11-18	Brazil	Rio de Janeiro	29826	Human	unknown	unknown
VOC	Gamma	P.1	GR/501Y.V3	hCoV-19/Brazil/RJ-FUNED-330107714/2020	betacoronavirus	EPI_ISL_2249444	2020-11-18	Brazil	Rio de Janeiro	29829	Human	unknown	unknown
VOC	Gamma	P.1	GR/501Y.V3	hCoV-19/Brazil/AM-FIOCRUZ-20843221KPS/2020	betacoronavirus	EPI_ISL_2777375	2020-12-21	Brazil	Amazonas	29745	Human	21	Female
VOC	Gamma	P.1	GR/501Y.V3	hCoV-19/Brazil/AM-FIOCRUZ-20843227TBH/2020	betacoronavirus	EPI_ISL_2777376	2020-12-21	Brazil	Amazonas	29702	Human	38	Female
VOC	Gamma	P.1	GR/501Y.V3	hCoV-19/Brazil/AM-FIOCRUZ-20843233AFS/2020	betacoronavirus	EPI_ISL_2777377	2020-12-22	Brazil	Amazonas	29722	Human	29	Male
VOC	Gamma	P.1	GR/501Y.V3	hCoV-19/Brazil/AM-FIOCRUZ-20890661TCR/2020	betacoronavirus	EPI_ISL_2777382	2020-12-03	Brazil	Amazonas	29777	Human	38	Female
VOC	Gamma	P.1	GR/501Y.V3	hCoV-19/Brazil/AM-FIOCRUZ-20890718FFM/2020	betacoronavirus	EPI_ISL_2777384	2020-12-07	Brazil	Amazonas	29777	Human	38	Female
VOC	Gamma	P.1	GR/501Y.V3	hCoV-19/Brazil/AM-FIOCRUZ-20895375SCN/2020	betacoronavirus	EPI_ISL_2777388	2020-12-04	Brazil	Amazonas	29777	Human	20	Female
VOC	Gamma	P.1	GR/501Y.V3	hCoV-19/Brazil/AM-FIOCRUZ-20895868ACR/2020	betacoronavirus	EPI_ISL_2777393	2020-12-22	Brazil	Amazonas	29781	Human	46	Female
VOC	Gamma	P.1	GR/501Y.V3	hCoV-19/Brazil/AM-FIOCRUZ-20843228ZC/2020	betacoronavirus	EPI_ISL_833139	2020-12-22	Brazil	Amazonas	29782	Human	71	Female
VOC	Gamma	P.1	GR/501Y.V3	hCoV-19/Brazil/AM-987/2020	betacoronavirus	EPI_ISL_833167	2020-12-16	Brazil	Amazonas	29846	Human	unknown	unknown
VOC	Gamma	P.1	GR/501Y.V3	hCoV-19/Brazil/AM-991/2020	betacoronavirus	EPI_ISL_833171	2020-12-17	Brazil	Amazonas	29871	Human	unknown	unknown
VOC	Gamma	P.1	GR/501Y.V3	hCoV-19/Brazil/AM-992/2020	betacoronavirus	EPI_ISL_833172	2020-12-17	Brazil	Amazonas	29853	Human	unknown	unknown
VOC	Gamma	P.1	GR/501Y.V3	hCoV-19/Brazil/AM-993/2020	betacoronavirus	EPI_ISL_833173	2020-12-18	Brazil	Amazonas	29847	Human	unknown	unknown
VOC	Gamma	P.1	GR/501Y.V3	hCoV-19/Brazil/AM-994/2020	betacoronavirus	EPI_ISL_833174	2020-12-22	Brazil	Amazonas	29857	Human	unknown	unknown
VOC	Gamma	P.1	GR/501Y.V3	hCoV-19/Brazil/AM-IEC-177290/2020	betacoronavirus	EPI_ISL_918499	2020-12-21	Brazil	Amazonas	29743	Human	63	Female
VOC	Gamma	P.1	GR/501Y.V3	hCoV-19/Brazil/AM-IEC-177301/2020	betacoronavirus	EPI_ISL_918504	2020-12-21	Brazil	Amazonas	29798	Human	77	Male
VOC	Omicron	B.1.1.529	GRA	hCoV-19/HongKong/VM21044713-1/2021	betacoronavirus	EPI_ISL_6590782	2021-11-13	Hong Kong		29752	Human	36	Male
VOC	Omicron	B.1.1.529	GRA	hCoV-19/SouthAfrica/NICD-N21606-DX64492/2021	betacoronavirus	EPI_ISL_6647961	2021-11-15	South Africa	Gauteng	29804	Human	38	unknown
VOC	Omicron	B.1.1.529	GRA	hCoV-19/HongKong/VM21044713_WHP5047-S5/2021	betacoronavirus	EPI_ISL_6716902	2021-11-15	Hong Kong		29640	Human	36	Male
VOC	Omicron	B.1.1.529	GRA	hCoV-19/SouthAfrica/CERI-KRISP-K032366/2021	betacoronavirus	EPI_ISL_6795847	2021-11-15	South Africa	Gauteng	29744	Human	27	Female
VOC	Omicron	B.1.1.529	GRA	hCoV-19/SouthAfrica/CERI-KRISP-K032367/2021	betacoronavirus	EPI_ISL_6795848	2021-11-15	South Africa	Gauteng	29729	Human	54	Female
VOC	Omicron	B.1.1.529	GRA	hCoV-19/HongKong/HKU-211129-001/2021	betacoronavirus	EPI_ISL_6841980	2021-11-14	Hong Kong		29752	Human	unknown	unknown
VOC	Omicron	B.1.1.529	GRA	hCoV-19/SouthAfrica/NICD-N21437/2021	betacoronavirus	EPI_ISL_6913991	2021-11-09	South Africa	Gauteng	29751	Human	unknown	unknown
VOC	Omicron	B.1.1.529	GRA	hCoV-19/SouthAfrica/NICD-N21438/2021	betacoronavirus	EPI_ISL_6913992	2021-11-10	South Africa	Gauteng	29751	Human	unknown	unknown
VOC	Omicron	B.1.1.529	GRA	hCoV-19/SouthAfrica/NICD-N21439/2021	betacoronavirus	EPI_ISL_6913993	2021-11-10	South Africa	Gauteng	29751	Human	unknown	unknown
VOC	Omicron	B.1.1.529	GRA	hCoV-19/SouthAfrica/NICD-N21440/2021	betacoronavirus	EPI_ISL_6913994	2021-11-10	South Africa	Gauteng	29751	Human	unknown	unknown
VOC	Omicron	B.1.1.529	GRA	hCoV-19/SouthAfrica/NICD-N21441/2021	betacoronavirus	EPI_ISL_6913995	2021-11-08	South Africa	Gauteng	29751	Human	unknown	unknown
VOC	Omicron	B.1.1.529	GRA	hCoV-19/SouthAfrica/NICD-N21442/2021	betacoronavirus	EPI_ISL_6913996	2021-11-15	South Africa	Gauteng	29751	Human	unknown	unknown
VOC	Omicron	B.1.1.529	GRA	hCoV-19/SouthAfrica/NICD-N21443/2021	betacoronavirus	EPI_ISL_6913997	2021-11-15	South Africa	Gauteng	29751	Human	unknown	unknown
VOC	Omicron	B.1.1.529	GRA	hCoV-19/SouthAfrica/NICD-N21444/2021	betacoronavirus	EPI_ISL_6913998	2021-11-15	South Africa	Gauteng	29751	Human	unknown	unknown
VOC	Omicron	B.1.1.529	GRA	hCoV-19/SouthAfrica/NICD-N21446/2021	betacoronavirus	EPI_ISL_6913999	2021-11-15	South Africa	Gauteng	29751	Human	unknown	unknown
VOC	Omicron	B.1.1.529	GRA	hCoV-19/SouthAfrica/NICD-N21454/2021	betacoronavirus	EPI_ISL_6914007	2021-11-15	South Africa	Gauteng	29751	Human	unknown	unknown
VOC	Omicron	B.1.1.529	GRA	hCoV-19/HongKong/HKU-691/2021	betacoronavirus	EPI_ISL_7138045	2021-11-14	Hong Kong		29873	Human	unknown	unknown
VOC	Omicron	B.1.1.529	GRA	hCoV-19/SouthAfrica/NICD-N21754/2021	betacoronavirus	EPI_ISL_7337500	2021-11-15	South Africa	Gauteng	29751	Human	29	Female
VOC	Omicron	B.1.1.529	GRA	hCoV-19/SouthAfrica/NICD-N21398/2021	betacoronavirus	EPI_ISL_7456440	2021-11-05	South Africa	Gauteng	29709	Human	26	Male
VOC	Omicron	B.1.1.529	GRA	hCoV-19/SouthAfrica/NICD-N22481/2021	betacoronavirus	EPI_ISL_7740798	2021-11-11	South Africa	Limpopo	29751	Human	27	Male
VOI	Lambda	C.37	GR/452Q.V1	hCoV-19/Peru/CAL-INS-667/2021	betacoronavirus	EPI_ISL_1111127	2021-01-18	Peru	Callao	29871	Human	unknown	unknown	?
VOI	Lambda	C.37	GR/452Q.V1	hCoV-19/Peru/CAL-INS-668/2021	betacoronavirus	EPI_ISL_1111128	2021-01-18	Peru	Callao	29888	Human	unknown	unknown	?
VOI	Lambda	C.37	GR/452Q.V1	hCoV-19/Peru/CAL-INS-670/2021	betacoronavirus	EPI_ISL_1111130	2021-01-17	Peru	Callao	29901	Human	unknown	unknown	?
VOI	Lambda	C.37	GR/452Q.V1	hCoV-19/Peru/LIM-INS-386/2021	betacoronavirus	EPI_ISL_1111284	2021-01-18	Peru	Lima	29894	Human	unknown	unknown	?
VOI	Lambda	C.37	GR/452Q.V1	hCoV-19/Peru/LIM-INS-387/2021	betacoronavirus	EPI_ISL_1111285	2021-01-18	Peru	Lima	29901	Human	unknown	unknown	?
VOI	Lambda	C.37	GR/452Q.V1	hCoV-19/Peru/LIM-INS-393/2021	betacoronavirus	EPI_ISL_1111291	2021-01-18	Peru	Lima	29858	Human	unknown	unknown	?
VOI	Lambda	C.37	GR/452Q.V1	hCoV-19/Peru/LIM-INS-397/2021	betacoronavirus	EPI_ISL_1111295	2021-01-18	Peru	Lima	29895	Human	unknown	unknown	?
VOI	Lambda	C.37	GR/452Q.V1	hCoV-19/Peru/LIM-INS-398/2021	betacoronavirus	EPI_ISL_1111296	2021-01-18	Peru	Lima	29878	Human	unknown	unknown	?
VOI	Lambda	C.37	GR/452Q.V1	hCoV-19/Peru/LIM-INS-404/2021	betacoronavirus	EPI_ISL_1111302	2021-01-18	Peru	Lima	29879	Human	unknown	unknown	?
VOI	Lambda	C.37	GR/452Q.V1	hCoV-19/Peru/LIM-INS-418/2021	betacoronavirus	EPI_ISL_1111316	2021-01-17	Peru	Lima	29890	Human	unknown	unknown	?
VOI	Lambda	C.37	GR/452Q.V1	hCoV-19/Peru/LIM-INS-419/2021	betacoronavirus	EPI_ISL_1111317	2021-01-17	Peru	Lima	29901	Human	unknown	unknown	?
VOI	Lambda	C.37	GR/452Q.V1	hCoV-19/Peru/LIM-INS-420/2021	betacoronavirus	EPI_ISL_1111318	2021-01-17	Peru	Lima	29898	Human	unknown	unknown	?
VOI	Lambda	C.37	GR/452Q.V1	hCoV-19/Peru/LIM-INS-421/2021	betacoronavirus	EPI_ISL_1111319	2021-01-17	Peru	Lima	29895	Human	unknown	unknown	?
VOI	Lambda	C.37	GR/452Q.V1	hCoV-19/Peru/LIM-INS-423/2021	betacoronavirus	EPI_ISL_1111321	2021-01-17	Peru	Lima	29899	Human	unknown	unknown	?
VOI	Lambda	C.37	GR/452Q.V1	hCoV-19/Peru/LIM-INS-424/2021	betacoronavirus	EPI_ISL_1111322	2021-01-17	Peru	Lima	29863	Human	unknown	unknown	?
VOI	Lambda	C.37	GR/452Q.V1	hCoV-19/Peru/LIM-INS-430/2021	betacoronavirus	EPI_ISL_1111328	2021-01-17	Peru	Lima	29895	Human	unknown	unknown	?
VOI	Lambda	C.37	GR/452Q.V1	hCoV-19/Peru/LIM-INS-433/2021	betacoronavirus	EPI_ISL_1111331	2021-01-17	Peru	Lima	29901	Human	unknown	unknown	?
VOI	Lambda	C.37	GR/452Q.V1	hCoV-19/Peru/LIM-INS-434/2021	betacoronavirus	EPI_ISL_1111332	2021-01-17	Peru	Lima	29887	Human	unknown	unknown	?
VOI	Lambda	C.37	GR/452Q.V1	hCoV-19/Peru/LIM-INS-436/2021	betacoronavirus	EPI_ISL_1111334	2021-01-17	Peru	Lima	29901	Human	unknown	unknown	?
VOI	Lambda	C.37	GR/452Q.V1	hCoV-19/Peru/LIM-INS-437/2021	betacoronavirus	EPI_ISL_1111335	2021-01-17	Peru	Lima	29874	Human	unknown	unknown	?
VOI	Lambda	C.37	GR/452Q.V1	hCoV-19/Peru/LIM-INS-443/2021	betacoronavirus	EPI_ISL_1111341	2021-01-17	Peru	Lima	29901	Human	unknown	unknown	?
VOI	Lambda	C.37	GR/452Q.V1	hCoV-19/Peru/LIM-UPCH-0372/2021	betacoronavirus	EPI_ISL_1629764	2021-01-01	Peru	Lima	29744	Human	unknown	unknown
VOI	Lambda	C.37	GR/452Q.V1	hCoV-19/Peru/LIM-UPCH-0434/2021	betacoronavirus	EPI_ISL_1629788	2021-01-30	Peru	Lima	29781	Human	25	Male
VOI	Lambda	C.37	GR/452Q.V1	hCoV-19/Peru/LIM-UPCH-0438/2021	betacoronavirus	EPI_ISL_1629790	2021-01-30	Peru	Lima	29781	Human	19	Male
VOI	Lambda	C.37	GR/452Q.V1	hCoV-19/Peru/AYA-INS-1914/2021	betacoronavirus	EPI_ISL_3023609	2021-01-28	Peru	Ayacucho	29803	Human	49	Male
VOI	Lambda	C.37	GR/452Q.V1	hCoV-19/Peru/C01m04/2021	betacoronavirus	EPI_ISL_3050654	2021-01-28	Peru	Callao	29794	Human	16	Male
VOI	Lambda	C.37	GR/452Q.V1	hCoV-19/Peru/PIU-INS-2136/2021	betacoronavirus	EPI_ISL_3376321	2021-01-29	Peru	Piura	29786	Human	45	Male
VOI	Lambda	C.37	GR/452Q.V1	hCoV-19/Peru/PIU-INS-2148/2021	betacoronavirus	EPI_ISL_3376333	2021-01-25	Peru	Piura	29786	Human	39	Female
VOI	Lambda	C.37	GR/452Q.V1	hCoV-19/Peru/PIU-INS-2367/2021	betacoronavirus	EPI_ISL_3401550	2021-01-27	Peru	Piura	29789	Human	32	Female
VOI	Lambda	C.37	GR/452Q.V1	hCoV-19/Peru/PIU-INS-2369/2021	betacoronavirus	EPI_ISL_3401552	2021-01-27	Peru	Piura	29786	Human	49	Male
VOI	Lambda	C.37	GR/452Q.V1	hCoV-19/Peru/AYA-INS-2387/2021	betacoronavirus	EPI_ISL_3401570	2021-01-28	Peru	Ayacucho	29785	Human	31	Male
VOI	Lambda	C.37	GR/452Q.V1	hCoV-19/Peru/AYA-INS-2394/2021	betacoronavirus	EPI_ISL_3401577	2021-01-23	Peru	Ayacucho	29807	Human	43	Male
VOI	Lambda	C.37	GR/452Q.V1	hCoV-19/Peru/SAM-INS-2419/2021	betacoronavirus	EPI_ISL_3401602	2021-01-11	Peru	San Martin	29783	Human	40	Female
VOI	Lambda	C.37	GR/452Q.V1	hCoV-19/Peru/SAM-INS-2421/2021	betacoronavirus	EPI_ISL_3401604	2021-01-09	Peru	San Martin	29786	Human	25	Male
VOI	Lambda	C.37	GR/452Q.V1	hCoV-19/Peru/SAM-INS-2426/2021	betacoronavirus	EPI_ISL_3401609	2021-01-08	Peru	San Martin	29791	Human	22	Male
VOI	Lambda	C.37	GR/452Q.V1	hCoV-19/Peru/LIM-INS-2761/2021	betacoronavirus	EPI_ISL_3672517	2021-01-29	Peru	Lima	29843	Human	46	Female
VOI	Lambda	C.37	GR/452Q.V1	hCoV-19/Peru/LIM-INS-8451/2021	betacoronavirus	EPI_ISL_5934937	2021-01-29	Peru	Lima	29835	Human	45	Female
VOI	Mu	B.1.621	GH	hCoV-19/Colombia/MAG-INS-VG-482/2021	betacoronavirus	EPI_ISL_1220045	2021-01-11	Colombia	Magdalena	29494	Human	unknown	Female
VOI	Mu	B.1.621	GH	hCoV-19/Colombia/MAG-INS-VG-1330/2021	betacoronavirus	EPI_ISL_1424054	2021-02-26	Colombia	Magdalena	29519	Human	52	Female
VOI	Mu	B.1.621	G	hCoV-19/Colombia/MAG-INS-VG-1331/2021	betacoronavirus	EPI_ISL_1424055	2021-02-27	Colombia	Magdalena	29519	Human	56	Male
VOI	Mu	B.1.621	GH	hCoV-19/USA/NJ-CDC-ASC210006835/2021	betacoronavirus	EPI_ISL_1562674	2021-03-14	USA	New Jersey	29846	Human	40	Male
VOI	Mu	B.1.621	GH	hCoV-19/Colombia/LAG-INS-VG-1399/2021	betacoronavirus	EPI_ISL_1582978	2021-02-26	Colombia	La Guajira	29493	Human	11	Female
VOI	Mu	B.1.621	GH	hCoV-19/Colombia/LAG-INS-VG-1400/2021	betacoronavirus	EPI_ISL_1582979	2021-03-02	Colombia	La Guajira	29493	Human	22	Female
VOI	Mu	B.1.621	GH	hCoV-19/Colombia/LAG-INS-VG-1401/2021	betacoronavirus	EPI_ISL_1582980	2021-02-21	Colombia	La Guajira	29493	Human	58	Female
VOI	Mu	B.1.621	GH	hCoV-19/Colombia/NSA-INS-VG-1687/2021	betacoronavirus	EPI_ISL_1582981	2021-03-10	Colombia	Norte de Santander	29781	Human	33	Male
VOI	Mu	B.1.621	GH	hCoV-19/Colombia/MAG-INS-VG-1603/2021	betacoronavirus	EPI_ISL_1582984	2021-03-08	Colombia	Magdalena	29490	Human	53	Female
VOI	Mu	B.1.621	GH	hCoV-19/Colombia/MAG-INS-VG-1609/2021	betacoronavirus	EPI_ISL_1582986	2021-03-11	Colombia	Magdalena	29490	Human	49	Male
VOI	Mu	B.1.621	GH	hCoV-19/Colombia/MAG-INS-VG-1619/2021	betacoronavirus	EPI_ISL_1582988	2021-03-15	Colombia	Magdalena	29781	Human	1	Male
VOI	Mu	B.1.621	GH	hCoV-19/Colombia/MAG-INS-VG-1622/2021	betacoronavirus	EPI_ISL_1582989	2021-03-17	Colombia	Magdalena	29493	Human	75	Female
VOI	Mu	B.1.621	GH	hCoV-19/Colombia/MAG-INS-VG-1624/2021	betacoronavirus	EPI_ISL_1582990	2021-03-08	Colombia	Magdalena	29493	Human	34	Male
VOI	Mu	B.1.621	GH	hCoV-19/Colombia/MAG-INS-VG-1639/2021	betacoronavirus	EPI_ISL_1582991	2021-03-06	Colombia	Magdalena	29493	Human	34	Male
VOI	Mu	B.1.621	GH	hCoV-19/Colombia/MAG-INS-VG-1642/2021	betacoronavirus	EPI_ISL_1582992	2021-03-08	Colombia	Magdalena	29493	Human	43	Female
VOI	Mu	B.1.621	GH	hCoV-19/Colombia/MAG-INS-VG-1644/2021	betacoronavirus	EPI_ISL_1582993	2021-02-27	Colombia	Magdalena	29493	Human	25	Female
VOI	Mu	B.1.621	GH	hCoV-19/Colombia/MAG-INS-VG-1646/2021	betacoronavirus	EPI_ISL_1582994	2021-03-10	Colombia	Magdalena	29781	Human	63	Male
VOI	Mu	B.1.621	GH	hCoV-19/Colombia/ATL-INS-VG-1513/2021	betacoronavirus	EPI_ISL_1582996	2021-03-15	Colombia	Atlantico	29322	Human	72	Female
VOI	Mu	B.1.621	GH	hCoV-19/Colombia/MAG-INS-VG-1588/2021	betacoronavirus	EPI_ISL_1820926	2021-02-26	Colombia	Magdalena	29781	Human	60	Male
VOI	Mu	B.1.621	GH	hCoV-19/Colombia/ATL-INS-VG-1633/2021	betacoronavirus	EPI_ISL_1820927	2021-03-04	Colombia	Atlantico	29766	Human	32	Male
VOI	Mu	B.1.621	GH	hCoV-19/Colombia/DC-INS-VG-1525/2021	betacoronavirus	EPI_ISL_1820928	2021-03-14	Colombia	Bogota	29781	Human	43	Female
VOI	Mu	B.1.621	GH	hCoV-19/Colombia/ATL-INS-VG-1632/2021	betacoronavirus	EPI_ISL_1820929	2021-03-03	Colombia	Atlantico	29781	Human	51	Female
VOI	Mu	B.1.621	GH	hCoV-19/Colombia/ATL-INS-VG-1634/2021	betacoronavirus	EPI_ISL_1820930	2021-03-03	Colombia	Atlantico	29778	Human	83	Male
VOI	Mu	B.1.621	GH	hCoV-19/Colombia/ATL-INS-VG-1626/2021	betacoronavirus	EPI_ISL_1820932	2021-03-04	Colombia	Atlantico	29781	Human	40	Female
VOI	Mu	B.1.621	GH	hCoV-19/Colombia/DC-INS-VG-1512/2021	betacoronavirus	EPI_ISL_1820934	2021-03-15	Colombia	Bogota	29781	Human	87	Male
VOI	Mu	B.1.621	GH	hCoV-19/Colombia/MAG-INS-VG-1936/2021	betacoronavirus	EPI_ISL_1820955	2021-03-19	Colombia	Magdalena	29778	Human	41	Female
VOI	Mu	B.1.621	GH	hCoV-19/Colombia/VAC-INS-VG-1491/2021	betacoronavirus	EPI_ISL_1820958	2021-03-05	Colombia	Valle del Cauca	29781	Human	34	Female
VOI	Mu	B.1.621	GH	hCoV-19/Colombia/AMA-INS-LET-2-013/2021	betacoronavirus	EPI_ISL_1820959	2021-03-12	Colombia	Amazonas	29607	Human	27	Male
VOI	Mu	B.1.621	GH	hCoV-19/Colombia/ANT-CWOHC-VG-SEC00108D/2021	betacoronavirus	EPI_ISL_1824702	2021-03-03	Colombia	Antioquia	29493	Human	58	Male
VOI	Mu	B.1.621	GH	hCoV-19/Colombia/ANT-CWOHC-VG-SEC00109E/2021	betacoronavirus	EPI_ISL_1824703	2021-03-08	Colombia	Antioquia	29322	Human	60	Female
VOI	Mu	B.1.621	GH	hCoV-19/Colombia/ANT-CWOHC-VG-SEC00189G/2021	betacoronavirus	EPI_ISL_1824711	2021-03-09	Colombia	Antioquia	29493	Human	43	Female
VOI	Mu	B.1.621	GH	hCoV-19/Colombia/ANT-CWOHC-VG-SEC00191I/2021	betacoronavirus	EPI_ISL_1824712	2021-03-10	Colombia	Antioquia	29322	Human	28	Female
VOI	Mu	B.1.621	GH	hCoV-19/Colombia/ANT-CWOHC-VG-SEC00192J/2021	betacoronavirus	EPI_ISL_1824713	2021-03-10	Colombia	Antioquia	29316	Human	18	Female
VOI	Mu	B.1.621	GH	hCoV-19/USA/AZ-ASPHL-3859/2021	betacoronavirus	EPI_ISL_2086307	2021-03-17	USA	Arizona	29829	Human	unknown	unknown
VOI	Mu	B.1.621	GH	hCoV-19/Colombia/CAQ-INS-VG-2178/2021	betacoronavirus	EPI_ISL_2500969	2021-03-18	Colombia	Caqueta	29781	Human	55	Female
VOI	Mu	B.1.621	GH	hCoV-19/Colombia/ANT-CWOHC-VG-SEC00760F/2021	betacoronavirus	EPI_ISL_2621861	2021-03-10	Colombia	Antioquia	29778	Human	28	Male
VOI	Mu	B.1.621	GH	hCoV-19/Venezuela/Fal1944/2021	betacoronavirus	EPI_ISL_3507370	2021-01-21	Venezuela	Falcon	29831	Human	unknown	unknown
VOI	Mu	B.1.621	GH	hCoV-19/Colombia/DC-INS-335658/2021	betacoronavirus	EPI_ISL_4196902	2021-03-02	Colombia	Bogota	29781	Human	27	Female
VOI	Mu	B.1.621	GH	hCoV-19/USA/FL-CDC-STM-000040058/2021	betacoronavirus	EPI_ISL_4347267	2021-03-18	USA	Florida	29830	Human	50	Male
VOI	Mu	B.1.621	GH	hCoV-19/USA/FL-CDC-STM-000041035/2021	betacoronavirus	EPI_ISL_4347631	2021-03-20	USA	Florida	29814	Human	45	Female
VOI	Mu	B.1.621	GH	hCoV-19/USA/FL-CDC-ASC210012211/2021	betacoronavirus	EPI_ISL_4361546	2021-03-19	USA	Florida	29894	Human	24	Female
VOI	Mu	B.1.621	GH	hCoV-19/USA/FL-CDC-ASC210010933/2021	betacoronavirus	EPI_ISL_4365285	2021-03-18	USA	Florida	29893	Human	28	Male
VOI	Mu	B.1.621	GH	hCoV-19/USA/FL-CDC-FG-014233/2021	betacoronavirus	EPI_ISL_4372077	2021-03-17	USA	Florida	29812	Human	28	Male
VOI	Mu	B.1.621	GH	hCoV-19/Colombia/ANT-PRO-LDSP358/2021	betacoronavirus	EPI_ISL_4958022	2021-03-08	Colombia	Antioquia	29781	Human	25	Male
VOI	Mu	B.1.621	GH	hCoV-19/USA/FL-CDC-STM-000035378/2021	betacoronavirus	EPI_ISL_4962237	2021-03-12	USA	Florida	29813	Human	29	Female
VOI	Mu	B.1.621	GH	hCoV-19/USA/VA-CDC-LC0030987/2021	betacoronavirus	EPI_ISL_4963077	2021-03-14	USA	Virginia	29703	Human	32	Male
VOI	Mu	B.1.621	GH	hCoV-19/USA/FL-CDC-LC0029845/2021	betacoronavirus	EPI_ISL_4965554	2021-03-18	USA	Florida	29698	Human	47	Female
VOI	Mu	B.1.621	GH	hCoV-19/USA/FL-CDC-LC0026266/2021	betacoronavirus	EPI_ISL_4966220	2021-03-11	USA	Florida	29709	Human	70	Female
VOI	Mu	B.1.621	GH	hCoV-19/Colombia/ANT-PRO-LDSP287/2021	betacoronavirus	EPI_ISL_4984908	2021-03-07	Colombia	Antioquia	29781	Human	32	Male
VOI	Mu	B.1.621	GH	hCoV-19/Colombia/HUI-UGRA-VG-5396/2021	betacoronavirus	EPI_ISL_5020133	2021-01-16	Colombia	Huila	29319	Human	23	Female
VOI	Mu	B.1.621	GH	hCoV-19/Bolivia/SAN-UPCH-0978/2021	betacoronavirus	EPI_ISL_5147062	2021-02-06	Bolivia	Santa Cruz	29817	Human	28	Female
VOI	Mu	B.1.621	GH	hCoV-19/Colombia/ANT-LDSP357/2021	betacoronavirus	EPI_ISL_6512558	2021-01-08	Colombia	Antioquia	29466	Human	52	Male
VUM		AZ.5	GR	hCoV-19/Philippines/PH-PGC-06126/2021	betacoronavirus	EPI_ISL_2156221	2021-02-09	Philippines	National Capital Region	29787	Human	24	Male
VUM		AZ.5	GR	hCoV-19/Mauritius/P-1383/2021	betacoronavirus	EPI_ISL_6472144	2021-02-12	Mauritius		29801	Human	29	Male
VUM		B.1.525	G/484K.V3	hCoV-19/Nigeria/CV667/2020	betacoronavirus	EPI_ISL_1035819	2020-12-20	Nigeria	Edo State	29828	Human	16	Male
VUM		B.1.525	G/484K.V3	hCoV-19/Nigeria/CV672/2020	betacoronavirus	EPI_ISL_1035823	2020-12-23	Nigeria	Edo State	29768	Human	13	Male
VUM		B.1.525	G/484K.V3	hCoV-19/Nigeria/CV736/2021	betacoronavirus	EPI_ISL_1093463	2021-01-05	Nigeria	Edo State	29787	Human	39	Male
VUM		B.1.525	G/484K.V3	hCoV-19/Nigeria/CV719/2021	betacoronavirus	EPI_ISL_1093466	2021-01-02	Nigeria	Edo State	29831	Human	36	Female
VUM		B.1.525	G/484K.V3	hCoV-19/Nigeria/CV727/2020	betacoronavirus	EPI_ISL_1093467	2020-12-29	Nigeria	Edo State	29827	Human	73	Female
VUM		B.1.525	G/484K.V3	hCoV-19/Nigeria/CV728/2020	betacoronavirus	EPI_ISL_1093468	2020-12-27	Nigeria	Edo State	29834	Human	85	Male
VUM		B.1.525	G/484K.V3	hCoV-19/Nigeria/CV729/2021	betacoronavirus	EPI_ISL_1093469	2021-01-02	Nigeria	Edo State	29840	Human	40	Male
VUM		B.1.525	G/484K.V3	hCoV-19/Nigeria/CV731/2021	betacoronavirus	EPI_ISL_1093470	2021-01-02	Nigeria	Edo State	29810	Human	38	Female
VUM		B.1.525	G/484K.V3	hCoV-19/Nigeria/CV732/2021	betacoronavirus	EPI_ISL_1093471	2021-01-03	Nigeria	Edo State	29858	Human	33	Male
VUM		B.1.525	G/484K.V3	hCoV-19/Nigeria/CV735/2021	betacoronavirus	EPI_ISL_1093472	2021-01-05	Nigeria	Edo State	29786	Human	30	Female
VUM		B.1.525	G/484K.V3	hCoV-19/USA/NY-Wadsworth-21017703-01/2020	betacoronavirus	EPI_ISL_1226710	2020-12-30	USA	New York	29721	Human	76	Male
VUM		B.1.525	G/484K.V3	hCoV-19/Nigeria/CV925/2021	betacoronavirus	EPI_ISL_1715364	2021-01-03	Nigeria	Abuja	29834	Human	74	Female
VUM		B.1.525	G/484K.V3	hCoV-19/Nigeria/CV934/2021	betacoronavirus	EPI_ISL_1715370	2021-01-03	Nigeria	Abuja	29788	Human	43	unknown
VUM		B.1.525	G/484K.V3	hCoV-19/Canada/ON-SC4161/2020	betacoronavirus	EPI_ISL_1739895	2020-12-14	Canada	Ontario	29790	Human	unknown	unknown
VUM		B.1.525	G/484K.V3	hCoV-19/Canada/ON-SC4162/2020	betacoronavirus	EPI_ISL_1739896	2020-12-14	Canada	Ontario	29794	Human	unknown	unknown
VUM		B.1.525	G/484K.V3	hCoV-19/Canada/ON-SC4163/2020	betacoronavirus	EPI_ISL_1739897	2020-12-14	Canada	Ontario	29781	Human	unknown	unknown
VUM		B.1.525	G/484K.V3	hCoV-19/Canada/ON-SC4164/2020	betacoronavirus	EPI_ISL_1739898	2020-12-14	Canada	Ontario	29789	Human	unknown	unknown
VUM		B.1.525	G/484K.V3	hCoV-19/Canada/ON-SC4168/2020	betacoronavirus	EPI_ISL_1739900	2020-12-14	Canada	Ontario	29790	Human	unknown	unknown
VUM		B.1.525	G/484K.V3	hCoV-19/Italy/LOM-TIGEM-IZSM-COLLI-14382/2020	betacoronavirus	EPI_ISL_2282156	2020-12-16	Italy	Lombardy	29880	Human	10	Female
VUM		B.1.525	G/484K.V3	hCoV-19/BurkinaFaso/CV1839/2020	betacoronavirus	EPI_ISL_4255081	2020-12-19	Burkina Faso	Ouagadougou	29823	Human	unknown	unknown
VUM		B.1.525	G/484K.V3	hCoV-19/BurkinaFaso/CV1840/2020	betacoronavirus	EPI_ISL_4255082	2020-12-23	Burkina Faso	Ouagadougou	29805	Human	unknown	unknown
VUM		B.1.525	G/484K.V3	hCoV-19/UnitedArabEmirates/BTC-4990/2021	betacoronavirus	EPI_ISL_5142953	2021-01-02	United Arab Emirates	Abu Dhabi	29830	Human	57	Male
VUM		B.1.525	G/484K.V3	hCoV-19/England/CAMC-C769B3/2020	betacoronavirus	EPI_ISL_760883	2020-12-15	United Kingdom	England	29709	Human	unknown	unknown
VUM		B.1.525	G/484K.V3	hCoV-19/England/MILK-CA47FE/2020	betacoronavirus	EPI_ISL_762449	2020-12-16	United Kingdom	England	29709	Human	unknown	unknown
VUM		B.1.525	G/484K.V3	hCoV-19/England/MILK-DAD606/2020	betacoronavirus	EPI_ISL_797195	2020-12-28	United Kingdom	England	29709	Human	unknown	unknown
VUM		B.1.525	G/484K.V3	hCoV-19/England/QEUH-E93A7F/2021	betacoronavirus	EPI_ISL_836799	2021-01-04	United Kingdom	England	29709	Human	unknown	unknown
VUM		B.1.525	G/484K.V3	hCoV-19/England/QEUH-E948CF/2021	betacoronavirus	EPI_ISL_836839	2021-01-04	United Kingdom	England	29709	Human	unknown	unknown
VUM		B.1.525	G/484K.V3	hCoV-19/England/QEUH-E93C6A/2021	betacoronavirus	EPI_ISL_836880	2021-01-04	United Kingdom	England	29709	Human	unknown	unknown
VUM		B.1.525	G/484K.V3	hCoV-19/England/QEUH-E93AAC/2021	betacoronavirus	EPI_ISL_836881	2021-01-04	United Kingdom	England	29709	Human	unknown	unknown
VUM		B.1.525	G/484K.V3	hCoV-19/France/IDF-CERBAHC-0056/2021	betacoronavirus	EPI_ISL_855551	2021-01-06	France	Ile-de-France	29830	Human	37	Female
VUM		B.1.525	G/484K.V3	hCoV-19/Nigeria/FC-CV562/2020	betacoronavirus	EPI_ISL_872626	2020-12-29	Nigeria	Abuja	29812	Human	58	Male
VUM		B.1.525	G/484K.V3	hCoV-19/France/IDF-IPP01421/2021	betacoronavirus	EPI_ISL_941092	2021-01-06	France	Ile de France	29697	Human	38	Female
VUM		B.1.525	G/484K.V3	hCoV-19/Nigeria/CV639/2020	betacoronavirus	EPI_ISL_941287	2020-12-29	Nigeria	Lagos State	29858	Human	28	Female
VUM		B.1.525	G/484K.V3	hCoV-19/Nigeria/CV641/2020	betacoronavirus	EPI_ISL_941289	2020-12-29	Nigeria	Lagos State	29819	Human	44	Female
VUM		B.1.525	G/484K.V3	hCoV-19/Nigeria/CV642/2020	betacoronavirus	EPI_ISL_941290	2020-12-29	Nigeria	Lagos State	29756	Human	24	Female
VUM		B.1.525	G/484K.V3	hCoV-19/Ghana/WACCBIP-GS57/2021	betacoronavirus	EPI_ISL_944729	2021-01-06	Ghana		29783	Human	unknown	unknown
VUM		B.1.525	G/484K.V3	hCoV-19/Ghana/WACCBIP-GS102/2021	betacoronavirus	EPI_ISL_944732	2021-01-06	Ghana		29783	Human	unknown	unknown
VUM		B.1.525	G/484K.V3	hCoV-19/Nigeria/BCVL-18921/2021	betacoronavirus	EPI_ISL_985124	2021-01-05	Nigeria	Oyo	29708	Human	unknown	unknown
VUM		B.1.526	GH/253G.V1	hCoV-19/USA/NY-NP-3840/2020	betacoronavirus	EPI_ISL_1080798	2020-12-11	USA	New York	29772	Human	unknown	unknown
VUM		B.1.526	GH/253G.V1	hCoV-19/USA/DE-DHSS-B1061934/2020	betacoronavirus	EPI_ISL_1137003	2020-12-02	USA	Delaware	29841	Human	unknown	unknown
VUM		B.1.526	GH/253G.V1	hCoV-19/USA/DE-DHSS-B1061922/2020	betacoronavirus	EPI_ISL_1137005	2020-12-02	USA	Delaware	29802	Human	unknown	unknown
VUM		B.1.526	GH/253G.V1	hCoV-19/USA/NY-Wadsworth-21014328-01/2020	betacoronavirus	EPI_ISL_1227033	2020-12-09	USA	New York	29855	Human	59	Female
VUM		B.1.526	GH/253G.V1	hCoV-19/USA/NY-MSHSPSP-PV24059/2020	betacoronavirus	EPI_ISL_1300879	2020-12-03	USA	New York	29716	Human	58	unknown
VUM		B.1.526	GH/253G.V1	hCoV-19/USA/NY-MSHSPSP-PV24066/2020	betacoronavirus	EPI_ISL_1300880	2020-12-04	USA	New York	29718	Human	30	unknown
VUM		B.1.526	GH/253G.V1	hCoV-19/USA/NY-MSHSPSP-PV24650/2020	betacoronavirus	EPI_ISL_1300881	2020-12-06	USA	New York	29829	Human	62	Female
VUM		B.1.526	GH/253G.V1	hCoV-19/USA/NY-MSHSPSP-PV24823/2020	betacoronavirus	EPI_ISL_1300882	2020-12-07	USA	New York	29714	Human	27	unknown
VUM		B.1.526	GH/253G.V1	hCoV-19/USA/NY-MSHSPSP-PV24816/2020	betacoronavirus	EPI_ISL_1708781	2020-12-07	USA	New York	29697	Human	63	Male
VUM		B.1.526	GH/253G.V1	hCoV-19/USA/NY-NYULH1475/2020	betacoronavirus	EPI_ISL_1922718	2020-12-24	USA	New York	29530	Human	unknown	unknown
VUM		B.1.526	GH/253G.V1	hCoV-19/USA/NY-NYULH1501/2020	betacoronavirus	EPI_ISL_1922743	2020-12-12	USA	New York	29530	Human	unknown	unknown
VUM		B.1.526	GH/253G.V1	hCoV-19/USA/NY-NYCPHL-004620/2020	betacoronavirus	EPI_ISL_2151395	2020-11-23	USA	New York	29749	Human	69	Female
VUM		B.1.526	GH/253G.V1	hCoV-19/USA/MA-UMASSMED-P026H07/2020	betacoronavirus	EPI_ISL_3410170	2020-11-23	USA	Massachusetts	29816	Human	44	Female
VUM		B.1.526	GH/253G.V1	hCoV-19/USA/NY-MSHSPSP-PV24850/2020	betacoronavirus	EPI_ISL_3690642	2020-12-17	USA	New York	29714	Human	26	Male
VUM		B.1.526	GH/253G.V1	hCoV-19/USA/NY-MSHSPSP-PV22505/2020	betacoronavirus	EPI_ISL_6491898	2020-11-03	USA	New York	29744	Human	89	Male
VUM		B.1.526	GH/253G.V1	hCoV-19/USA/NY-NYCPHL-001443/2020	betacoronavirus	EPI_ISL_683762	2020-11-23	USA	New York	29772	Human	44	Male
VUM		B.1.526	GH/253G.V1	hCoV-19/USA/NY-Wadsworth-290339-01/2020	betacoronavirus	EPI_ISL_765493	2020-12-19	USA	New York	29845	Human	65	Female
VUM		B.1.526	GH/253G.V1	hCoV-19/USA/NY-Wadsworth-290357-01/2020	betacoronavirus	EPI_ISL_765494	2020-12-18	USA	New York	29782	Human	51	Female
VUM		B.1.526	GH/253G.V1	hCoV-19/USA/NY-Wadsworth-290403-01/2020	betacoronavirus	EPI_ISL_765495	2020-12-16	USA	New York	29782	Human	49	Male
VUM		B.1.526	GH/253G.V1	hCoV-19/USA/NY-Wadsworth-291994-01/2020	betacoronavirus	EPI_ISL_767595	2020-12-21	USA	New York	29759	Human	32	Female
VUM		B.1.526	GH/253G.V1	hCoV-19/USA/NY-Wadsworth-291999-01/2020	betacoronavirus	EPI_ISL_767598	2020-12-20	USA	New York	29840	Human	83	Male
VUM		B.1.526	GH/253G.V1	hCoV-19/USA/NY-Wadsworth-21000327-01/2020	betacoronavirus	EPI_ISL_794226	2020-12-27	USA	New York	29755	Human	52	Female
VUM		B.1.526	GH/253G.V1	hCoV-19/USA/NY-NYCPHL-001804/2020	betacoronavirus	EPI_ISL_812733	2020-12-15	USA	New York	29772	Human	4	Male
VUM		B.1.526	GH/253G.V1	hCoV-19/USA/NY-NYCPHL-001663/2020	betacoronavirus	EPI_ISL_823886	2020-12-08	USA	New York	29749	Human	50	Male
VUM		B.1.526	GH/253G.V1	hCoV-19/USA/NY-NYCPHL-001924/2020	betacoronavirus	EPI_ISL_832270	2020-12-23	USA	New York	29772	Human	25	Female
VUM		B.1.526	GH/253G.V1	hCoV-19/USA/NY-NYCPHL-001940/2020	betacoronavirus	EPI_ISL_832271	2020-12-24	USA	New York	29772	Human	44	Male
VUM		B.1.526	GH/253G.V1	hCoV-19/USA/NY-Wadsworth-21005068-01/2020	betacoronavirus	EPI_ISL_854459	2020-12-27	USA	New York	29834	Human	23	Female
VUM		B.1.526	GH/253G.V1	hCoV-19/USA/NY-Wadsworth-21004930-01/2020	betacoronavirus	EPI_ISL_861244	2020-12-25	USA	New York	29849	Human	10	Male
VUM		B.1.526	GH/253G.V1	hCoV-19/USA/NY-Wadsworth-21004944-01/2020	betacoronavirus	EPI_ISL_861258	2020-12-25	USA	New York	29845	Human	5	Female
VUM		B.1.526	GH/253G.V1	hCoV-19/USA/NY-Wadsworth-21004976-01/2020	betacoronavirus	EPI_ISL_861278	2020-12-24	USA	New York	29849	Human	74	Male
VUM		B.1.526	GH/253G.V1	hCoV-19/USA/NY-Wadsworth-21004979-01/2020	betacoronavirus	EPI_ISL_861280	2020-12-24	USA	New York	29855	Human	21	Female
VUM		B.1.526	GH/253G.V1	hCoV-19/USA/NY-Wadsworth-21004982-01/2020	betacoronavirus	EPI_ISL_861283	2020-12-24	USA	New York	29852	Human	19	Female
VUM		B.1.526	GH/253G.V1	hCoV-19/USA/NY-Wadsworth-21004984-01/2020	betacoronavirus	EPI_ISL_861285	2020-12-25	USA	New York	29802	Human	47	Female
VUM		B.1.526	GH/253G.V1	hCoV-19/USA/NY-Wadsworth-21007567-01/2020	betacoronavirus	EPI_ISL_936036	2020-12-27	USA	New York	29802	Human	67	Male
VUM		B.1.526	GH/253G.V1	hCoV-19/USA/NY-PRL-2020_1229_00G05/2020	betacoronavirus	EPI_ISL_984771	2020-12-26	USA	New York	29734	Human	27	Female
VUM		B.1.526	GH/253G.V1	hCoV-19/USA/NY-PRL-2020_1229_00C05/2020	betacoronavirus	EPI_ISL_984772	2020-12-26	USA	New York	29733	Human	34	Male
VUM		B.1.526	GH/253G.V1	hCoV-19/USA/NY-PRL-2020_1229_01G01/2020	betacoronavirus	EPI_ISL_984773	2020-12-26	USA	New York	29736	Human	45	Male
VUM		B.1.526	GH/253G.V1	hCoV-19/USA/NY-PRL-2020_1229_01H03/2020	betacoronavirus	EPI_ISL_984816	2020-12-27	USA	New York	29733	Human	4	Female
VUM		B.1.526	GH/253G.V1	hCoV-19/USA/NY-PRL-2020_1229_01H04/2020	betacoronavirus	EPI_ISL_984817	2020-12-27	USA	New York	29736	Human	64	Male
VUM		B.1.617.1	G	hCoV-19/India/MH-NEERI-NGP-26041/2020	betacoronavirus	EPI_ISL_1360304	2020-12-05	India	Maharashtra	29839	Human	24	Male
VUM		B.1.617.1	G	hCoV-19/India/MH-NEERI-NGP-26336/2020	betacoronavirus	EPI_ISL_1360306	2020-12-07	India	Maharashtra	29838	Human	28	Male
VUM		B.1.617.1	G	hCoV-19/India/MH-NEERI-NGP-28141/2020	betacoronavirus	EPI_ISL_1360316	2020-12-17	India	Maharashtra	29839	Human	40	Male
VUM		B.1.617.1	G	hCoV-19/India/MH-NEERI-NGP-28251/2020	betacoronavirus	EPI_ISL_1360317	2020-12-18	India	Maharashtra	29838	Human	57	Female
VUM		B.1.617.1	G	hCoV-19/India/MH-NEERI-NGP-28440/2020	betacoronavirus	EPI_ISL_1360318	2020-12-19	India	Maharashtra	29839	Human	58	Male
VUM		B.1.617.1	G	hCoV-19/India/MH-NEERI-NGP-29787/2021	betacoronavirus	EPI_ISL_1360328	2021-01-05	India	Maharashtra	29839	Human	41	Male
VUM		B.1.617.1	G	hCoV-19/India/MH-NEERI-NGP-29989/2021	betacoronavirus	EPI_ISL_1360329	2021-01-06	India	Maharashtra	29839	Human	25	Male
VUM		B.1.617.1	G	hCoV-19/India/MH-NEERI-NGP-30174/2021	betacoronavirus	EPI_ISL_1360330	2021-01-07	India	Maharashtra	29838	Human	62	Female
VUM		B.1.617.1	G	hCoV-19/India/MH-NEERI-NGP-31246/2021	betacoronavirus	EPI_ISL_1360338	2021-01-15	India	Maharashtra	29839	Human	42	Female
VUM		B.1.617.1	G	hCoV-19/India/MH-NEERI-NGP-31600/2021	betacoronavirus	EPI_ISL_1360341	2021-01-18	India	Maharashtra	29839	Human	40	Male
VUM		B.1.617.1	G	hCoV-19/India/MH-NEERI-NGP-31713/2021	betacoronavirus	EPI_ISL_1360342	2021-01-19	India	Maharashtra	29837	Human	42	Female
VUM		B.1.617.1	G	hCoV-19/India/ILSGS00308/2020	betacoronavirus	EPI_ISL_1372093	2020-12-01	India	Odisha	29825	Human	58	Male
VUM		B.1.617.1	G	hCoV-19/India/MH-NCCS-CSPL19868/2021	betacoronavirus	EPI_ISL_1415214	2021-01-09	India	Maharashtra	29879	Human	27	Male
VUM		B.1.617.1	G	hCoV-19/India/MH-NCCS-BJ1/2021	betacoronavirus	EPI_ISL_1415216	2021-01-03	India	Maharashtra	29865	Human	57	Male
VUM		B.1.617.1	G	hCoV-19/India/MH-NCCS-BJ2/2021	betacoronavirus	EPI_ISL_1415270	2021-01-03	India	Maharashtra	29894	Human	54	Male
VUM		B.1.617.1	G	hCoV-19/India/MH-NCCS-BJ4/2021	betacoronavirus	EPI_ISL_1415274	2021-01-03	India	Maharashtra	29860	Human	unknown	unknown
VUM		B.1.617.1	G	hCoV-19/India/MH-NCCS-DHW50406/2020	betacoronavirus	EPI_ISL_1415298	2020-12-25	India	Maharashtra	29870	Human	38	Male
VUM		B.1.617.1	G	hCoV-19/India/MH-NCCS-BJ6/2021	betacoronavirus	EPI_ISL_1415359	2021-01-03	India	Maharashtra	29866	Human	unknown	unknown
VUM		B.1.617.1	G	hCoV-19/Indonesia/SS-NIHRD-WGS002222/2021	betacoronavirus	EPI_ISL_1969250	2021-01-14	Indonesia	South Sumatra	29819	Human	64	Female
VUM		B.1.617.1	G	hCoV-19/India/DL-NCDC-1209208/2021	betacoronavirus	EPI_ISL_2448197	2021-01-03	India	Delhi	29781	Human	69	Female
VUM		B.1.617.1	G	hCoV-19/India/DL-NCDC-1209382/2021	betacoronavirus	EPI_ISL_2448296	2021-01-03	India	Delhi	29781	Human	47	Female
VUM		B.1.617.1	G	hCoV-19/India/MP-NCDC-190935/2021	betacoronavirus	EPI_ISL_2460721	2021-01-03	India	Madhya Pradesh	29781	Human	58	Female
VUM		B.1.617.1	G	hCoV-19/India/DL-NCDC-1209201/2021	betacoronavirus	EPI_ISL_2504454	2021-01-03	India	Delhi	29796	Human	22	Male
VUM		B.1.617.1	G	hCoV-19/India/MP-NCDC-190933/2021	betacoronavirus	EPI_ISL_2556861	2021-01-03	India	Madhya Pradesh	29799	Human	58	Female
VUM		B.1.617.1	G	hCoV-19/India/DL-ILBS-111889/2021	betacoronavirus	EPI_ISL_3277086	2021-01-05	India	Delhi	29787	Human	57	Male
VUM		B.1.617.1	G	hCoV-19/India/MH-ICMR-MCL_5739_5794/2020	betacoronavirus	EPI_ISL_3473447	2020-12-01	India	Maharashtra	29873	Human	17	Female
VUM		B.1.617.1	G	hCoV-19/India/MH-ICMR-MCL_5741_5797/2020	betacoronavirus	EPI_ISL_3473604	2020-12-01	India	Maharashtra	29903	Human	16	Female
VUM		B.1.617.1	G	hCoV-19/India/MH-ICMR-MCL_5740_5796/2020	betacoronavirus	EPI_ISL_3473605	2020-12-01	India	Maharashtra	29899	Human	13	Female
VUM		B.1.617.1	G	hCoV-19/India/MH-ICMR-MCL_5726_5782/2020	betacoronavirus	EPI_ISL_3473615	2020-11-01	India	Maharashtra	29872	Human	12	Male
VUM		B.1.617.1	G	hCoV-19/India/MH-ICMR-MCL_5724_5780/2020	betacoronavirus	EPI_ISL_3473617	2020-11-01	India	Maharashtra	29903	Human	2	Male
VUM		B.1.617.1	G	hCoV-19/India/MH-ICMR-MCL_5722_5776/2020	betacoronavirus	EPI_ISL_3473619	2020-11-01	India	Maharashtra	29903	Human	18	Female
VUM		B.1.617.1	G	hCoV-19/India/MH-ICMR-MCL_5718_5774/2020	betacoronavirus	EPI_ISL_3473621	2020-10-01	India	Maharashtra	29877	Human	9	Female
VUM		B.1.617.1	G	hCoV-19/India/MH-ICMR-MCL_5714_5770/2020	betacoronavirus	EPI_ISL_3473624	2020-10-01	India	Maharashtra	29900	Human	11	Female
VUM		B.1.617.1	G	hCoV-19/India/MH-IGIB-Sample102/2021	betacoronavirus	EPI_ISL_4126749	2021-01-14	India	Maharashtra	29832	Human	34	Male
VUM		B.1.617.1	G	hCoV-19/India/AS-CVD-34936/2020	betacoronavirus	EPI_ISL_4192891	2020-12-02	India	Assam	29805	Human	63	Male
VUM		B.1.617.1	G	hCoV-19/India/MH-IISER-Pune-IP00924/2020	betacoronavirus	EPI_ISL_4743493	2020-12-19	India	Maharashtra	29784	Human	47	Male
VUM		B.1.617.1	G	hCoV-19/India/MH-IISER-Pune-IP00929/2020	betacoronavirus	EPI_ISL_4743496	2020-12-24	India	Maharashtra	29757	Human	66	Male
VUM		B.1.617.1	G	hCoV-19/India/MH-IISER-Pune-IP00930/2020	betacoronavirus	EPI_ISL_4743497	2020-12-28	India	Maharashtra	29292	Human	35	Male
VUM		B.1.617.1	G	hCoV-19/India/MH-IISER-Pune-IP00935/2021	betacoronavirus	EPI_ISL_4743500	2021-01-13	India	Maharashtra	29775	Human	24	Male
VUM		B.1.617.1	G	hCoV-19/India/MH-IISER-Pune-IP00940/2021	betacoronavirus	EPI_ISL_4743504	2021-01-21	India	Maharashtra	29680	Human	31	Male
VUM		B.1.617.1	G	hCoV-19/India/MH-IISER-Pune-IP00942/2021	betacoronavirus	EPI_ISL_4743506	2021-01-14	India	Maharashtra	29782	Human	37	Male
VUM		B.1.617.1	G	hCoV-19/India/DL-ILBS-B_72/2021	betacoronavirus	EPI_ISL_6025352	2021-01-23	India	Delhi	29810	Human	14	Male
VUM		B.1.617.1	G	hCoV-19/India/DL-ILBS-B_63/2021	betacoronavirus	EPI_ISL_6098110	2021-01-06	India	Delhi	29778	Human	6	Female
VUM		B.1.617.1	G	hCoV-19/India/DL-ILBS-B_70/2021	betacoronavirus	EPI_ISL_6098120	2021-01-17	India	Delhi	29784	Human	7	Female
VUM		B.1.617.1	G	hCoV-19/India/DL-ILBS-B_74/2021	betacoronavirus	EPI_ISL_6098128	2021-01-25	India	Delhi	29784	Human	12	Male
VUM		B.1.617.1	G	hCoV-19/India/MH-RFIP01523/2020	betacoronavirus	EPI_ISL_6151339	2020-12-26	India	Maharashtra	29844	Human	55	Male
VUM		B.1.617.1	G	hCoV-19/India/TG-RFCH00899_CIB3211/2021	betacoronavirus	EPI_ISL_6877931	2021-01-25	India	Telangana	29781	Human	46	Male
VUM		B.1.617.1	G	hCoV-19/India/TG-RFCH00914_CIB3226/2021	betacoronavirus	EPI_ISL_6877944	2021-01-23	India	Telangana	29739	Human	55	Female
VUM		B.1.617.1	G	hCoV-19/India/TG-RFCH00922_CIB3234/2021	betacoronavirus	EPI_ISL_6877952	2021-01-23	India	Telangana	29753	Human	47	Female
VUM		B.1.630	GH	hCoV-19/DominicanRepublic/21915/2021	betacoronavirus	EPI_ISL_2274018	2021-03-17	Dominican Republic		29690	Human	22	unkown
VUM		B.1.640	GH	hCoV-19/Congo/FCRM-100-A32.28.09.21/2021	betacoronavirus	EPI_ISL_5592661	2021-09-28	Republic of the Congo	Brazzaville	29683	Human	39	Female
VUM		B.1.640	GH	hCoV-19/Congo/FCRM-127-A23.20.10.21/2021	betacoronavirus	EPI_ISL_6077271	2021-10-20	Republic of the Congo	Brazzaville	29649	Human	4	Female
VUM		B.1.640	GH	hCoV-19/Congo/FCRM-117-12838/2021	betacoronavirus	EPI_ISL_6077285	2021-10-26	Republic of the Congo	Brazzaville	29683	Human	54	Female
VUM		B.1.640	GH	hCoV-19/Congo/FCRM-120-A2/2021	betacoronavirus	EPI_ISL_6077286	2021-10-25	Republic of the Congo	Brazzaville	29683	Human	35	Male
VUM		B.1.640	GH	hCoV-19/Congo/FCRM-112-045/2021	betacoronavirus	EPI_ISL_6077287	2021-10-26	Republic of the Congo	Brazzaville	29683	Human	40	Male
VUM		B.1.640	GH	hCoV-19/Congo/FCRM-118-A1/2021	betacoronavirus	EPI_ISL_6077288	2021-10-23	Republic of the Congo	Brazzaville	29714	Human	43	Female
VUM		B.1.640	GH	hCoV-19/Congo/FCRM-115-12574/2021	betacoronavirus	EPI_ISL_6077289	2021-10-19	Republic of the Congo	Brazzaville	29714	Human	32	Female
VUM		B.1.640	GH	hCoV-19/Congo/FCRM-144-13618/2021	betacoronavirus	EPI_ISL_6700813	2021-11-13	Republic of the Congo	Brazzaville	29667	Human	28	Male
VUM		B.1.640	G	hCoV-19/Congo/FCRM-143-13695/2021	betacoronavirus	EPI_ISL_6700814	2021-11-21	Republic of the Congo	Brazzaville	29687	Human	67	Male
VUM		B.1.640	GH	hCoV-19/Congo/FCRM-145-13186/2021	betacoronavirus	EPI_ISL_6700819	2021-11-02	Republic of the Congo	Brazzaville	29714	Human	22	Female
VUM		B.1.640	GH	hCoV-19/Congo/RC-244/2021	betacoronavirus	EPI_ISL_6951030	2021-09-24	Republic of the Congo	Ouenze	29683	Human	52	Female
VUM		B.1.640	GH	hCoV-19/Congo/RC-253/2021	betacoronavirus	EPI_ISL_6951033	2021-11-02	Republic of the Congo	Moungali	29714	Human	35	Male
VUM		B.1.640	GH	hCoV-19/Congo/RC-254/2021	betacoronavirus	EPI_ISL_6951034	2021-11-02	Republic of the Congo	Mfilou	29683	Human	42	Male
VUM		B.1.640	GH	hCoV-19/Congo/RC-270/2021	betacoronavirus	EPI_ISL_6951037	2021-11-04	Republic of the Congo	Mfilou	29683	Human	35	Male
VUM		B.1.640	GH	hCoV-19/Congo/RC-272/2021	betacoronavirus	EPI_ISL_6951038	2021-11-18	Republic of the Congo	Ouenze	29683	Human	24	Male
VUM		B.1.640	GH	hCoV-19/Congo/RC-292/2021	betacoronavirus	EPI_ISL_6951040	2021-11-13	Republic of the Congo	Moungali	28609	Human	49	Male
VUM		B.1.640	GH	hCoV-19/Congo/RC-294/2021	betacoronavirus	EPI_ISL_6951041	2021-11-05	Republic of the Congo	Moungali	29683	Human	23	Male
VUM		B.1.640	GH	hCoV-19/Congo/RC-302/2021	betacoronavirus	EPI_ISL_6951044	2021-11-09	Republic of the Congo	Talangai	29683	Human	57	Male
VUM		B.1.640	GH	hCoV-19/Congo/RC-304/2021	betacoronavirus	EPI_ISL_6951046	2021-11-10	Republic of the Congo	Ouenze	29683	Human	38	Male
VUM		B.1.640	GH	hCoV-19/Congo/RC-305/2021	betacoronavirus	EPI_ISL_6951047	2021-11-06	Republic of the Congo	Talangai	29683	Human	28	Male
VUM		B.1.640	GH	hCoV-19/Congo/RC-307/2021	betacoronavirus	EPI_ISL_6951048	2021-11-06	Republic of the Congo	Ouenze	29683	Human	28	Male
VUM		B.1.640	GH	hCoV-19/Congo/RC-311/2021	betacoronavirus	EPI_ISL_6951049	2021-11-08	Republic of the Congo	Kintele	29683	Human	30	Female
VUM		B.1.640	GH	hCoV-19/Congo/RC-314/2021	betacoronavirus	EPI_ISL_6951051	2021-11-05	Republic of the Congo	Bacongo	29683	Human	34	Female
VUM		B.1.640	GH	hCoV-19/Congo/RC-315/2021	betacoronavirus	EPI_ISL_6951052	2021-11-05	Republic of the Congo	Ouenze	29683	Human	38	Male
VUM		B.1.640	GH	hCoV-19/Congo/RC-319/2021	betacoronavirus	EPI_ISL_6951054	2021-11-05	Republic of the Congo	Talangai	29683	Human	53	Male
VUM		B.1.640	GH	hCoV-19/Congo/RC-320/2021	betacoronavirus	EPI_ISL_6951055	2021-11-13	Republic of the Congo	Ouenze	29683	Human	27	Male
VUM		B.1.640	GH	hCoV-19/Congo/RC-321/2021	betacoronavirus	EPI_ISL_6951056	2021-11-05	Republic of the Congo	Ouenze	29683	Human	26	Male
VUM		B.1.640	GH	hCoV-19/Congo/RC-322/2021	betacoronavirus	EPI_ISL_6951057	2021-11-08	Republic of the Congo	Moungali	29683	Human	40	Male
VUM		B.1.640	GH	hCoV-19/Congo/RC-325/2021	betacoronavirus	EPI_ISL_6951059	2021-11-04	Republic of the Congo	Kintele	29683	Human	62	Female
VUM		B.1.640	GH	hCoV-19/Congo/RC-327/2021	betacoronavirus	EPI_ISL_6951060	2021-11-04	Republic of the Congo	Ouenze	29687	Human	26	Male
VUM		B.1.640	GH	hCoV-19/Congo/RC-207/2021	betacoronavirus	EPI_ISL_6951062	2021-10-28	Republic of the Congo	Ouenze	29755	Human	50	Male
VUM		B.1.640	GH	hCoV-19/Congo/RC-216/2021	betacoronavirus	EPI_ISL_6951063	2021-10-27	Republic of the Congo	Talangai	29756	Human	81	Male
VUM		B.1.640	GH	hCoV-19/Congo/RC-250/2021	betacoronavirus	EPI_ISL_6951071	2021-10-20	Republic of the Congo	Talangai	29756	Human	45	Male
VUM		B.1.640	G	hCoV-19/Congo/RC-264/2021	betacoronavirus	EPI_ISL_6951072	2021-11-04	Republic of the Congo	Bacongo	29756	Human	37	Female
VUM		B.1.640	GH	hCoV-19/Congo/RC-330/2021	betacoronavirus	EPI_ISL_6951073	2021-11-04	Republic of the Congo	Makelekele	29753	Human	28	Male
VUM		B.1.640	GH	hCoV-19/Congo/RC-179/2021	betacoronavirus	EPI_ISL_6951076	2021-11-02	Republic of the Congo	Talangai	29729	Human	37	Male
VUM		B.1.640	GH	hCoV-19/Congo/RC-180/2021	betacoronavirus	EPI_ISL_6951077	2021-10-30	Republic of the Congo	Ouenze	29720	Human	27	Male
VUM		B.1.640	G	hCoV-19/Congo/RC-194/2021	betacoronavirus	EPI_ISL_6951080	2021-10-28	Republic of the Congo	Ouenze	29756	Human	43	Male
VUM		B.1.640	GH	hCoV-19/Congo/RC-195/2021	betacoronavirus	EPI_ISL_6951081	2021-10-27	Republic of the Congo	Ouenze	29756	Human	44	Female
VUM		B.1.640	GH	hCoV-19/Congo/RC-202/2021	betacoronavirus	EPI_ISL_6951087	2021-10-29	Republic of the Congo	Moungali	29140	Human	43	Male
VUM		C.1.2	GR	hCoV-19/SouthAfrica/NICD-N7033/2021	betacoronavirus	EPI_ISL_2662640	2021-05-16	South Africa	Gauteng	29762	Human	47	Female
VUM		C.1.2	GR	hCoV-19/SouthAfrica/KRISP-K018657/2021	betacoronavirus	EPI_ISL_2726854	2021-06-17	South Africa	Gauteng	29841	Human	19	Female
VUM		C.1.2	GR	hCoV-19/SouthAfrica/KRISP-K018739/2021	betacoronavirus	EPI_ISL_2770450	2021-06-05	South Africa	Gauteng	29761	Human	78	Male
VUM		C.1.2	GR	hCoV-19/SouthAfrica/NICD-N9628/2021	betacoronavirus	EPI_ISL_2827937	2021-06-20	South Africa	Limpopo	29751	Human	76	Female
VUM		C.1.2	GR	hCoV-19/SouthAfrica/NICD-N9382/2021	betacoronavirus	EPI_ISL_2828749	2021-06-16	South Africa	Gauteng	29748	Human	46	Female
VUM		C.1.2	GR	hCoV-19/SouthAfrica/VIDA-KRISP-K018954/2021	betacoronavirus	EPI_ISL_2841668	2021-06-24	South Africa	Gauteng	29798	Human	50	Female
VUM		C.1.2	GR	hCoV-19/SouthAfrica/NICD-N9826/2021	betacoronavirus	EPI_ISL_2942287	2021-06-15	South Africa	Gauteng	29748	Human	47	Female
VUM		C.1.2	GR	hCoV-19/SouthAfrica/KRISP-K019509/2021	betacoronavirus	EPI_ISL_3132529	2021-06-23	South Africa	Gauteng	29847	Human	33	Female
VUM		C.1.2	GR	hCoV-19/SouthAfrica/KRISP-K019696/2021	betacoronavirus	EPI_ISL_3132608	2021-06-30	South Africa	KwaZulu-Natal	29840	Human	47	Male
VUM		C.1.2	GR	hCoV-19/SouthAfrica/KRISP-K019725/2021	betacoronavirus	EPI_ISL_3132623	2021-06-28	South Africa	Gauteng	29844	Human	39	unknown
VUM		C.1.2	GR	hCoV-19/SouthAfrica/NICD-N10334/2021	betacoronavirus	EPI_ISL_3149307	2021-06-30	South Africa	Gauteng	29748	Human	42	unknown
VUM		C.1.2	GR	hCoV-19/SouthAfrica/NICD-CRDM09175/2021	betacoronavirus	EPI_ISL_3281600	2021-06-22	South Africa	Gauteng	29746	Human	75	Male
VUM		C.1.2	GR	hCoV-19/SouthAfrica/NICD-N8841/2021	betacoronavirus	EPI_ISL_3342732	2021-06-07	South Africa	Gauteng	29757	Human	17	Female
VUM		C.1.2	GR	hCoV-19/SouthAfrica/NICD-N9216/2021	betacoronavirus	EPI_ISL_3342734	2021-06-08	South Africa	Gauteng	29757	Human	64	Male
VUM		C.1.2	GR	hCoV-19/SouthAfrica/NICD-N10102/2021	betacoronavirus	EPI_ISL_3717994	2021-06-29	South Africa	Gauteng	29748	Human	42	Female
VUM		C.1.2	GR	hCoV-19/SouthAfrica/NICD-N12106/2021	betacoronavirus	EPI_ISL_3838375	2021-06-30	South Africa	Eastern Cape	29750	Human	48	Male
VUM		C.1.2	GR	hCoV-19/SouthAfrica/NICD-N8738/2021	betacoronavirus	EPI_ISL_5510294	2021-06-04	South Africa	Gauteng	29746	Human	72	Female
FMV		AT.1	GR	hCoV-19/Russia/SPE-117/2021	betacoronavirus	EPI_ISL_1259282	2021-01-22	Russia	Saint Petersburg	29564	Human	20	Female
FMV		AT.1	GR	hCoV-19/Russia/PSK-16/2021	betacoronavirus	EPI_ISL_1259283	2021-01-18	Russia	Pskov	29803	Human	32	Male
FMV		AT.1	GR	hCoV-19/Russia/SPE-RII-MH14654S/2021	betacoronavirus	EPI_ISL_1491610	2021-02-11	Russia	Saint Petersburg	29767	Human	31	Male
FMV		AT.1	GR	hCoV-19/Russia/SPE-RII-MH14691S/2021	betacoronavirus	EPI_ISL_1491611	2021-02-11	Russia	Saint Petersburg	29772	Human	43	Female
FMV		AT.1	GR	hCoV-19/Russia/SPE-RII-MH15656S/2021	betacoronavirus	EPI_ISL_1652545	2021-03-18	Russia	Saint Petersburg	29767	Human	42	Male
FMV		AT.1	GR	hCoV-19/Russia/SPE-RII-MH15670S/2021	betacoronavirus	EPI_ISL_1652557	2021-03-09	Russia	Saint Petersburg	29767	Human	35	Female
FMV		AT.1	GR	hCoV-19/Russia/SPE-RII-MH15694S/2021	betacoronavirus	EPI_ISL_1652580	2021-03-01	Russia	Saint Petersburg	29767	Human	27	Female
FMV		AT.1	GR	hCoV-19/Russia/SPE-RII-MH15699S/2021	betacoronavirus	EPI_ISL_1652585	2021-03-09	Russia	Saint Petersburg	29734	Human	60	Male
FMV		AT.1	GR	hCoV-19/Russia/SPE-RII-MH15729S/2021	betacoronavirus	EPI_ISL_1652607	2021-02-26	Russia	Saint Petersburg	29767	Human	37	Male
FMV		AT.1	GR	hCoV-19/Russia/SPE-RII-MH15731S/2021	betacoronavirus	EPI_ISL_1652608	2021-03-14	Russia	Saint Petersburg	29781	Human	31	Male
FMV		AT.1	GR	hCoV-19/Russia/SPE-RII-MH15747S/2021	betacoronavirus	EPI_ISL_1652622	2021-03-02	Russia	Saint Petersburg	29739	Human	60	Male
FMV		AT.1	GR	hCoV-19/Russia/SPE-RII-MH15764S/2021	betacoronavirus	EPI_ISL_1652635	2021-03-12	Russia	Saint Petersburg	29767	Human	31	Male
FMV		AT.1	GR	hCoV-19/Russia/SPE-RII-MH15769S/2021	betacoronavirus	EPI_ISL_1652639	2021-02-27	Russia	Saint Petersburg	29781	Human	29	Female
FMV		AT.1	GR	hCoV-19/Russia/LEN-RII-MH14792S/2021	betacoronavirus	EPI_ISL_1664699	2021-02-17	Russia	Leningrad	29767	Human	35	Female
FMV		AT.1	GR	hCoV-19/Russia/LEN-RII-MH14832S/2021	betacoronavirus	EPI_ISL_1664729	2021-02-13	Russia	Leningrad	29767	Human	24	Male
FMV		AT.1	GR	hCoV-19/Russia/MOW-CRIE-L188A0885/2021	betacoronavirus	EPI_ISL_1823178	2021-03-28	Russia	Moscow	29720	Human	27	Male
FMV		AT.1	GR	hCoV-19/Russia/MOW-CRIE-L188A0886/2021	betacoronavirus	EPI_ISL_1823179	2021-03-30	Russia	Moscow	29717	Human	46	Female
FMV		AT.1	GR	hCoV-19/Russia/MOW-RII-MH16061S/2021	betacoronavirus	EPI_ISL_1919459	2021-04-02	Russia	Moscow	29768	Human	47	Male
FMV		AT.1	GR	hCoV-19/Russia/SPE-RII-MH16297S/2021	betacoronavirus	EPI_ISL_1919575	2021-04-14	Russia	Saint Petersburg	29767	Human	31	Male
FMV		AT.1	GR	hCoV-19/Russia/MOW-CRIE-L188K0257hu/2021	betacoronavirus	EPI_ISL_2032642	2021-04-11	Russia	Moscow	29720	Human	79	Male
FMV		AT.1	GR	hCoV-19/Russia/MOW-CRIE-L188K0243u/2021	betacoronavirus	EPI_ISL_2038871	2021-04-13	Russia	Moscow	29723	Human	35	Female
FMV		AT.1	GR	hCoV-19/Russia/MOW-CRIE-L188K0259u/2021	betacoronavirus	EPI_ISL_2038886	2021-04-12	Russia	Moscow	29720	Human	72	Female
FMV		AT.1	GR	hCoV-19/Russia/MOW-CRIE-L188K0298u/2021	betacoronavirus	EPI_ISL_2038912	2021-04-08	Russia	Moscow	29720	Human	77	Male
FMV		AT.1	GR	hCoV-19/Russia/SPE-RII-29826S/2021	betacoronavirus	EPI_ISL_2245644	2021-03-18	Russia	Saint Petersburg	29767	Human	51	Female
FMV		AT.1	GR	hCoV-19/Russia/SPE-RII-30114S/2021	betacoronavirus	EPI_ISL_2245649	2021-03-19	Russia	Saint Petersburg	29767	Human	72	Male
FMV		AT.1	GR	hCoV-19/Russia/SPE-RII-32566S/2021	betacoronavirus	EPI_ISL_2245663	2021-04-20	Russia	Saint Petersburg	29767	Human	60	Female
FMV		AT.1	GR	hCoV-19/Russia/SPE-RII-32651S/2021	betacoronavirus	EPI_ISL_2245665	2021-04-21	Russia	Saint Petersburg	29767	Human	62	Male
FMV		AT.1	GR	hCoV-19/Russia/SPE-RII-32811S/2021	betacoronavirus	EPI_ISL_2245670	2021-04-23	Russia	Saint Petersburg	29767	Human	58	Male
FMV		AT.1	GR	hCoV-19/Russia/SPE-RII-32827S/2021	betacoronavirus	EPI_ISL_2245675	2021-04-23	Russia	Saint Petersburg	29767	Human	52	Male
FMV		AT.1	GR	hCoV-19/Russia/SPE-RII-32842S/2021	betacoronavirus	EPI_ISL_2245677	2021-04-24	Russia	Saint Petersburg	29767	Human	52	Male
FMV		AT.1	GR	hCoV-19/Russia/SPE-RII-32882S/2021	betacoronavirus	EPI_ISL_2245679	2021-04-25	Russia	Saint Petersburg	29767	Human	93	Female
FMV		AT.1	GR	hCoV-19/Russia/SPE-RII-32885S/2021	betacoronavirus	EPI_ISL_2245680	2021-04-25	Russia	Saint Petersburg	29781	Human	60	Female
FMV		AT.1	GR	hCoV-19/Russia/SPE-RII-MH16265S/2021	betacoronavirus	EPI_ISL_2245716	2021-04-19	Russia	Saint Petersburg	29767	Human	43	Female
FMV		AT.1	GR	hCoV-19/Russia/SPE-RII-MH16266S/2021	betacoronavirus	EPI_ISL_2245717	2021-04-19	Russia	Saint Petersburg	29767	Human	37	Female
FMV		AT.1	GR	hCoV-19/Russia/SPE-RII-MH16267S/2021	betacoronavirus	EPI_ISL_2245718	2021-04-15	Russia	Saint Petersburg	29794	Human	29	Female
FMV		AT.1	GR	hCoV-19/Russia/SPE-RII-MH16307S/2021	betacoronavirus	EPI_ISL_2245728	2021-04-18	Russia	Saint Petersburg	29767	Human	73	unknown
FMV		AT.1	GR	hCoV-19/Russia/SPE-RII-MH16369S/2021	betacoronavirus	EPI_ISL_2245737	2021-04-23	Russia	Saint Petersburg	29734	Human	58	unknown
FMV		AT.1	GR	hCoV-19/Russia/SPE-RII-MH16467S/2021	betacoronavirus	EPI_ISL_2245763	2021-04-24	Russia	Saint Petersburg	29767	Human	24	Female
FMV		AT.1	GR	hCoV-19/Russia/SPE-RII-MH17221S/2021	betacoronavirus	EPI_ISL_2385216	2021-04-13	Russia	Saint Petersburg	29764	Human	57	Male
FMV		AT.1	GR	hCoV-19/Russia/SPE-RII-MH17229S/2021	betacoronavirus	EPI_ISL_2385222	2021-04-13	Russia	Saint Petersburg	29804	Human	21	Female
FMV		AT.1	GR	hCoV-19/Russia/SPE-RII-MH17232S/2021	betacoronavirus	EPI_ISL_2385223	2021-04-23	Russia	Saint Petersburg	29772	Human	44	Female
FMV		AT.1	GR	hCoV-19/Russia/SPE-RII-MH17239S/2021	betacoronavirus	EPI_ISL_2385229	2021-04-13	Russia	Saint Petersburg	29767	Human	44	Male
FMV		AT.1	GR	hCoV-19/Russia/SPE-RII-MH17247S/2021	betacoronavirus	EPI_ISL_2385236	2021-04-23	Russia	Saint Petersburg	29794	Human	41	Female
FMV		AT.1	GR	hCoV-19/Russia/SPE-RII-MH17285S/2021	betacoronavirus	EPI_ISL_2385263	2021-04-23	Russia	Saint Petersburg	29764	Human	66	Female
FMV		AT.1	GR	hCoV-19/Russia/SPE-RII-MH17347S/2021	betacoronavirus	EPI_ISL_2385306	2021-04-23	Russia	Saint Petersburg	29767	Human	45	Male
FMV		AT.1	GR	hCoV-19/Russia/BEL-RII-MH17539S/2021	betacoronavirus	EPI_ISL_2385376	2021-04-19	Russia	Belgorod	29795	Human	55	unknown
FMV		AT.1	GR	hCoV-19/Russia/MOW-CRIE-L106D0822ub/2021	betacoronavirus	EPI_ISL_3101247	2021-04-07	Russia	Moscow	29712	Human	28	Male
FMV		AT.1	GR	hCoV-19/Russia/MOW-CRIE-L189D3700ub/2021	betacoronavirus	EPI_ISL_3101291	2021-04-07	Russia	Moscow	29730	Human	53	Male
FMV		AT.1	GR	hCoV-19/Russia/MOW-CRIE-L189E3109ub/2021	betacoronavirus	EPI_ISL_3101296	2021-04-10	Russia	Moscow	29725	Human	21	Female
FMV		AT.1	GR	hCoV-19/Russia/MOW-CRIE-L189E1787ub/2021	betacoronavirus	EPI_ISL_3101302	2021-04-09	Russia	Moscow	29724	Human	29	Male
FMV		AT.1	GR	hCoV-19/Russia/MOW-CRIE-L189F1202ubh/2021	betacoronavirus	EPI_ISL_3101315	2021-04-11	Russia	Moscow	29703	Human	36	Female
FMV		AT.1	GR	hCoV-19/Russia/OMS-RII-MH22444S/2021	betacoronavirus	EPI_ISL_3454808	2021-03-16	Russia	Omsk Region	29710	Human	35	Male
FMV		AT.1	GR	hCoV-19/Russia/OMS-RII-MH22451S/2021	betacoronavirus	EPI_ISL_3454818	2021-03-08	Russia	Omsk	29794	Human	59	Male
FMV		AT.1	GR	hCoV-19/Russia/SPE-RII-MH15764V1/2021	betacoronavirus	EPI_ISL_3454837	2021-03-12	Russia	Saint Petersburg	29810	Human	31	Male
FMV		AT.1	GR	hCoV-19/Russia/SPE-RII-MH15764V2/2021	betacoronavirus	EPI_ISL_3454841	2021-03-12	Russia	Saint Petersburg	29802	Human	31	Male
FMV		AV.1	GR	hCoV-19/England/QEUH-144D7A1/2021	betacoronavirus	EPI_ISL_1487728	2021-03-23	United Kingdom	England	29764	Human	unknown	unknown
FMV		AV.1	GR	hCoV-19/England/QEUH-148F257/2021	betacoronavirus	EPI_ISL_1595332	2021-03-28	United Kingdom	England	29764	Human	unknown	unknown
FMV		AV.1	GR	hCoV-19/England/QEUH-14C1E55/2021	betacoronavirus	EPI_ISL_1595406	2021-03-31	United Kingdom	England	29764	Human	unknown	unknown
FMV		AV.1	GR	hCoV-19/England/CAMC-1507EE9/2021	betacoronavirus	EPI_ISL_1698537	2021-04-14	United Kingdom	England	29764	Human	unknown	unknown
FMV		AV.1	GR	hCoV-19/England/QEUH-1540F5A/2021	betacoronavirus	EPI_ISL_1857609	2021-04-27	United Kingdom	England	29764	Human	unknown	unknown
FMV		AV.1	GR	hCoV-19/England/QEUH-154128D/2021	betacoronavirus	EPI_ISL_1857666	2021-04-27	United Kingdom	England	29764	Human	unknown	unknown
FMV		AV.1	GR	hCoV-19/England/QEUH-1541092/2021	betacoronavirus	EPI_ISL_1857753	2021-04-27	United Kingdom	England	29764	Human	unknown	unknown
FMV		AV.1	GR	hCoV-19/England/QEUH-1543115/2021	betacoronavirus	EPI_ISL_1857951	2021-04-27	United Kingdom	England	29764	Human	unknown	unknown
FMV		AV.1	GR	hCoV-19/England/ALDP-1543D8A/2021	betacoronavirus	EPI_ISL_1912100	2021-04-26	United Kingdom	England	29764	Human	unknown	unknown
FMV		AV.1	GR	hCoV-19/England/ALDP-154D5B5/2021	betacoronavirus	EPI_ISL_1921237	2021-04-29	United Kingdom	England	29764	Human	unknown	unknown
FMV		AV.1	GR	hCoV-19/England/SHEF-10DA497/2021	betacoronavirus	EPI_ISL_1980353	2021-04-28	United Kingdom	England	29764	Human	unknown	unknown
FMV		AV.1	GR	hCoV-19/England/SHEF-10DC3F2/2021	betacoronavirus	EPI_ISL_1980365	2021-04-30	United Kingdom	England	29764	Human	unknown	unknown
FMV		AV.1	GR	hCoV-19/England/SHEF-10E58AC/2021	betacoronavirus	EPI_ISL_1980414	2021-04-30	United Kingdom	England	29764	Human	unknown	unknown
FMV		AV.1	GR	hCoV-19/England/MILK-154CAC6/2021	betacoronavirus	EPI_ISL_1987067	2021-04-23	United Kingdom	England	29764	Human	unknown	unknown
FMV		AV.1	GR	hCoV-19/England/ALDP-1555F07/2021	betacoronavirus	EPI_ISL_2004376	2021-05-01	United Kingdom	England	29764	Human	unknown	unknown
FMV		AV.1	GR	hCoV-19/England/ALDP-15561A6/2021	betacoronavirus	EPI_ISL_2004581	2021-05-01	United Kingdom	England	29476	Human	unknown	unknown
FMV		AV.1	GR	hCoV-19/England/ALDP-1557F6F/2021	betacoronavirus	EPI_ISL_2004704	2021-05-01	United Kingdom	England	29764	Human	unknown	unknown
FMV		AV.1	GR	hCoV-19/England/QEUH-153D6F1/2021	betacoronavirus	EPI_ISL_2004900	2021-04-26	United Kingdom	England	29764	Human	unknown	unknown
FMV		AV.1	GR	hCoV-19/England/MILK-1541FD1/2021	betacoronavirus	EPI_ISL_2005439	2021-04-26	United Kingdom	England	29764	Human	unknown	unknown
FMV		AV.1	GR	hCoV-19/England/ALDP-1558E25/2021	betacoronavirus	EPI_ISL_2021628	2021-05-02	United Kingdom	England	29764	Human	unknown	unknown
FMV		AV.1	GR	hCoV-19/England/MILK-155DA68/2021	betacoronavirus	EPI_ISL_2021658	2021-05-04	United Kingdom	England	29756	Human	unknown	unknown
FMV		AV.1	GR	hCoV-19/England/ALDP-155C6DE/2021	betacoronavirus	EPI_ISL_2022182	2021-05-04	United Kingdom	England	29764	Human	unknown	unknown
FMV		AV.1	GR	hCoV-19/England/ALDP-155C86F/2021	betacoronavirus	EPI_ISL_2022294	2021-05-04	United Kingdom	England	29764	Human	unknown	unknown
FMV		AV.1	GR	hCoV-19/England/ALDP-1562857/2021	betacoronavirus	EPI_ISL_2092318	2021-05-06	United Kingdom	England	29476	Human	unknown	unknown
FMV		AV.1	GR	hCoV-19/England/ALDP-1548EBF/2021	betacoronavirus	EPI_ISL_2092569	2021-04-26	United Kingdom	England	29764	Human	unknown	unknown
FMV		AV.1	GR	hCoV-19/England/MILK-1567FA8/2021	betacoronavirus	EPI_ISL_2119669	2021-05-08	United Kingdom	England	29764	Human	unknown	unknown
FMV		AV.1	GR	hCoV-19/England/MILK-156C978/2021	betacoronavirus	EPI_ISL_2120273	2021-05-05	United Kingdom	England	29764	Human	unknown	unknown
FMV		AV.1	GR	hCoV-19/England/ALDP-156A01B/2021	betacoronavirus	EPI_ISL_2120895	2021-05-07	United Kingdom	England	29764	Human	unknown	unknown
FMV		AV.1	GR	hCoV-19/England/ALDP-1569E30/2021	betacoronavirus	EPI_ISL_2120960	2021-05-07	United Kingdom	England	29764	Human	unknown	unknown
FMV		AV.1	GR	hCoV-19/England/ALDP-156A1CD/2021	betacoronavirus	EPI_ISL_2120972	2021-05-06	United Kingdom	England	29764	Human	unknown	unknown
FMV		AV.1	GR	hCoV-19/England/MILK-1565B3D/2021	betacoronavirus	EPI_ISL_2121628	2021-05-06	United Kingdom	England	29764	Human	unknown	unknown
FMV		AV.1	GR	hCoV-19/England/ALDP-1562E73/2021	betacoronavirus	EPI_ISL_2122397	2021-05-06	United Kingdom	England	29764	Human	unknown	unknown
FMV		AV.1	GR	hCoV-19/England/ALDP-15654BA/2021	betacoronavirus	EPI_ISL_2122546	2021-05-08	United Kingdom	England	29764	Human	unknown	unknown
FMV		AV.1	GR	hCoV-19/England/NORT-1BA57A0/2021	betacoronavirus	EPI_ISL_2126474	2021-04-29	United Kingdom	England	29847	Human	unknown	unknown
FMV		AV.1	GR	hCoV-19/England/NORT-1BB90F9/2021	betacoronavirus	EPI_ISL_2127047	2021-05-07	United Kingdom	England	29764	Human	unknown	unknown
FMV		AV.1	GR	hCoV-19/England/NORT-1BB9132/2021	betacoronavirus	EPI_ISL_2127052	2021-05-07	United Kingdom	England	29764	Human	unknown	unknown
FMV		AV.1	GR	hCoV-19/England/SHEF-10D9A3C/2021	betacoronavirus	EPI_ISL_2128461	2021-05-07	United Kingdom	England	29764	Human	unknown	unknown
FMV		AV.1	GR	hCoV-19/England/ALDP-1573729/2021	betacoronavirus	EPI_ISL_2236937	2021-05-08	United Kingdom	England	29764	Human	unknown	unknown
FMV		AV.1	GR	hCoV-19/England/ALDP-1573668/2021	betacoronavirus	EPI_ISL_2236967	2021-05-08	United Kingdom	England	29764	Human	unknown	unknown
FMV		AV.1	GR	hCoV-19/England/ALDP-1573AB7/2021	betacoronavirus	EPI_ISL_2237157	2021-05-08	United Kingdom	England	29764	Human	unknown	unknown
FMV		AV.1	GR	hCoV-19/England/ALDP-156BE4D/2021	betacoronavirus	EPI_ISL_2238485	2021-05-04	United Kingdom	England	29764	Human	unknown	unknown
FMV		AV.1	GR	hCoV-19/England/NORT-1BB750B/2021	betacoronavirus	EPI_ISL_2239443	2021-05-04	United Kingdom	England	29847	Human	unknown	unknown
FMV		AV.1	GR	hCoV-19/England/NORT-1BB75ED/2021	betacoronavirus	EPI_ISL_2239457	2021-05-04	United Kingdom	England	29847	Human	unknown	unknown
FMV		AV.1	GR	hCoV-19/England/NORT-1BB785D/2021	betacoronavirus	EPI_ISL_2239489	2021-05-04	United Kingdom	England	29847	Human	unknown	unknown
FMV		AV.1	GR	hCoV-19/England/NORT-1BB7FFE/2021	betacoronavirus	EPI_ISL_2239580	2021-05-06	United Kingdom	England	29847	Human	unknown	unknown
FMV		AV.1	GR	hCoV-19/England/NORT-1BBC339/2021	betacoronavirus	EPI_ISL_2239978	2021-05-01	United Kingdom	England	29847	Human	unknown	unknown
FMV		AV.1	GR	hCoV-19/England/NORT-1BBCBE6/2021	betacoronavirus	EPI_ISL_2240079	2021-05-08	United Kingdom	England	29847	Human	unknown	unknown
FMV		AV.1	GR	hCoV-19/England/NORT-1BBCCA7/2021	betacoronavirus	EPI_ISL_2240090	2021-05-08	United Kingdom	England	29844	Human	unknown	unknown
FMV		AV.1	GR	hCoV-19/England/NORT-1BBCE92/2021	betacoronavirus	EPI_ISL_2240118	2021-05-08	United Kingdom	England	29843	Human	unknown	unknown
FMV		AV.1	GR	hCoV-19/England/NORT-1BBD9FA/2021	betacoronavirus	EPI_ISL_2240274	2021-04-29	United Kingdom	England	29847	Human	unknown	unknown
FMV		AV.1	GR	hCoV-19/England/NORT-1BBDB30/2021	betacoronavirus	EPI_ISL_2240292	2021-04-29	United Kingdom	England	29848	Human	unknown	unknown
FMV		AV.1	GR	hCoV-19/England/NORT-1BC1F5B/2021	betacoronavirus	EPI_ISL_2356235	2021-05-07	United Kingdom	England	29847	Human	unknown	unknown
FMV		AV.1	GR	hCoV-19/England/NORT-1BC491E/2021	betacoronavirus	EPI_ISL_2434355	2021-04-28	United Kingdom	England	29764	Human	unknown	unknown
FMV		AV.1	GR	hCoV-19/England/NORT-1BC5018/2021	betacoronavirus	EPI_ISL_2434445	2021-05-05	United Kingdom	England	29846	Human	unknown	unknown
FMV		AV.1	GR	hCoV-19/England/NORT-1BC5485/2021	betacoronavirus	EPI_ISL_2434509	2021-05-05	United Kingdom	England	29847	Human	unknown	unknown
FMV		AV.1	GR	hCoV-19/England/NORT-1BC618D/2021	betacoronavirus	EPI_ISL_2434695	2021-05-05	United Kingdom	England	29847	Human	unknown	unknown
FMV		AV.1	GR	hCoV-19/England/NORT-1BC6572/2021	betacoronavirus	EPI_ISL_2434746	2021-05-05	United Kingdom	England	29847	Human	unknown	unknown
FMV		B.1.1.519	GR	hCoV-19/Mexico/CMX-INMEGEN-12-04-01/2020	betacoronavirus	EPI_ISL_1005559	2020-11-20	Mexico	Mexico City	29782	Human	51	Male
FMV		B.1.1.519	GR	hCoV-19/Mexico/CMX-INMEGEN-12-04-10/2020	betacoronavirus	EPI_ISL_1005568	2020-11-23	Mexico	Mexico City	29782	Human	49	Female
FMV		B.1.1.519	GR	hCoV-19/Mexico/CMX-INMEGEN-02-09-18/2020	betacoronavirus	EPI_ISL_1095516	2020-11-13	Mexico	Mexico City	29782	Human	30	Female
FMV		B.1.1.519	GR	hCoV-19/USA/AZ-TG745909/2020	betacoronavirus	EPI_ISL_1182420	2020-11-07	USA	Arizona	29872	Human	unknown	unknown
FMV		B.1.1.519	GR	hCoV-19/Switzerland/SO-ETHZ-521398/2020	betacoronavirus	EPI_ISL_1260406	2020-11-30	Switzerland	Solothurn	29845	Human	unknown	unknown
FMV		B.1.1.519	GR	hCoV-19/USA/WY-WPHL-21025083/2020	betacoronavirus	EPI_ISL_1540418	2020-12-01	USA	Wyoming	29782	Human	11	Male
FMV		B.1.1.519	GR	hCoV-19/USA/WY-WPHL-21025173/2020	betacoronavirus	EPI_ISL_1540420	2020-12-01	USA	Wyoming	29782	Human	34	Female
FMV		B.1.1.519	GR	hCoV-19/USA/WY-WPHL-21024829/2020	betacoronavirus	EPI_ISL_1540433	2020-11-10	USA	Wyoming	29782	Human	13	Female
FMV		B.1.1.519	GR	hCoV-19/USA/WY-WPHL-21024802/2020	betacoronavirus	EPI_ISL_1540434	2020-11-10	USA	Wyoming	29782	Human	46	Male
FMV		B.1.1.519	GR	hCoV-19/Argentina/INEI096535/2020	betacoronavirus	EPI_ISL_2104757	2020-11-08	Argentina	Buenos Aires	29862	Human	30	Female
FMV		B.1.1.519	GR	hCoV-19/Argentina/INEI096662/2020	betacoronavirus	EPI_ISL_2104760	2020-11-11	Argentina		29798	Human	unknown	unknown
FMV		B.1.1.519	GR	hCoV-19/Argentina/INEI096663/2020	betacoronavirus	EPI_ISL_2104761	2020-11-11	Argentina		29875	Human	unknown	unknown
FMV		B.1.1.519	GR	hCoV-19/USA/UT-UPHL-2105650590/2020	betacoronavirus	EPI_ISL_2290980	2020-12-01	USA	Utah	29806	Human	unknown	unknown
FMV		B.1.1.519	GR	hCoV-19/Canada/BC-BCCDC-37476/2020	betacoronavirus	EPI_ISL_2499646	2020-12-01	Canada	British Columbia	29714	Human	unknown	unknown
FMV		B.1.1.519	GR	hCoV-19/Mexico/CMX-INMEGEN-03-10-80/2020	betacoronavirus	EPI_ISL_3839095	2020-11-18	Mexico	Mexico City	29791	Human	27	Male
FMV		B.1.1.519	GR	hCoV-19/Mexico/CMX-INER-IBT-0662/2020	betacoronavirus	EPI_ISL_4496616	2020-11-23	Mexico	Mexico City	29758	Human	60	Male
FMV		B.1.1.519	GR	hCoV-19/Mexico/CMX-INER-IBT-0667/2020	betacoronavirus	EPI_ISL_4496621	2020-11-15	Mexico	Mexico City	29758	Human	25	Male
FMV		B.1.1.519	GR	hCoV-19/Mexico/CMX-INER-IBT-0669/2020	betacoronavirus	EPI_ISL_4496623	2020-11-26	Mexico	Mexico City	29758	Human	40	Male
FMV		B.1.1.519	GR	hCoV-19/Mexico/CMX-INER-IBT-0697/2020	betacoronavirus	EPI_ISL_4496651	2020-12-02	Mexico	Mexico City	29753	Human	24	Female
FMV		B.1.1.519	GR	hCoV-19/Mexico/CMX-INER-IBT-0699/2020	betacoronavirus	EPI_ISL_4496653	2020-12-01	Mexico	Mexico City	29758	Human	64	Male
FMV		B.1.1.519	GR	hCoV-19/Mexico/CMX-INER-IBT-0712/2020	betacoronavirus	EPI_ISL_4496666	2020-12-03	Mexico	Mexico City	29758	Human	67	Female
FMV		B.1.1.519	GR	hCoV-19/Mexico/CMX-INER-IBT-0791/2020	betacoronavirus	EPI_ISL_4888464	2020-11-10	Mexico	Mexico City	29758	Human	29	Male
FMV		B.1.1.519	GR	hCoV-19/Mexico/CMX-INER-IBT-0936/2020	betacoronavirus	EPI_ISL_5194956	2020-12-01	Mexico	Mexico City	29758	Human	29	Male
FMV		B.1.1.519	GR	hCoV-19/Mexico/CMX-INER-IBT-0938/2020	betacoronavirus	EPI_ISL_5194958	2020-12-03	Mexico	Mexico City	29758	Human	60	Female
FMV		B.1.1.519	GR	hCoV-19/USA/CA-CDPH-2000001223/2020	betacoronavirus	EPI_ISL_5713225	2020-11-30	USA	California	29782	Human	unknown	unknown
FMV		B.1.1.519	GR	hCoV-19/USA/TX-HMH-MCoV-18761/2020	betacoronavirus	EPI_ISL_785098	2020-11-21	USA	Texas	29903	Human	unknown	unknown
FMV		B.1.1.519	GR	hCoV-19/USA/FL-BPHL-2798/2020	betacoronavirus	EPI_ISL_876555	2020-11-23	USA	Florida	29804	Human	unknown	unknown
FMV		B.1.1.519	GR	hCoV-19/Mexico/PUE-InDRE_157/2020	betacoronavirus	EPI_ISL_913959	2020-11-25	Mexico	Puebla	29830	Human	44	Female
FMV		B.1.1.519	GR	hCoV-19/Mexico/VER-InDRE_169/2020	betacoronavirus	EPI_ISL_913970	2020-11-21	Mexico	Veracruz	29830	Human	68	Female
FMV		B.1.1.519	GR	hCoV-19/Mexico/MEX-InDRE_170/2020	betacoronavirus	EPI_ISL_913971	2020-11-27	Mexico	State of Mexico	29830	Human	52	Female
FMV		B.1.1.519	GR	hCoV-19/Mexico/CMX-INMEGEN-11-11/2020	betacoronavirus	EPI_ISL_933520	2020-11-30	Mexico	Mexico City	29782	Human	21	Male
FMV		B.1.1.519	GR	hCoV-19/Mexico/CMX-INMEGEN-11-12/2020	betacoronavirus	EPI_ISL_933521	2020-11-30	Mexico	Mexico City	29782	Human	25	Male
FMV		B.1.1.519	GR	hCoV-19/Mexico/CMX-INMEGEN-11-13/2020	betacoronavirus	EPI_ISL_933522	2020-11-30	Mexico	Mexico City	29782	Human	33	Male
FMV		B.1.1.519	GR	hCoV-19/Mexico/CMX-INMEGEN-11-22/2020	betacoronavirus	EPI_ISL_933531	2020-11-30	Mexico	Mexico City	29782	Human	88	Female
FMV		B.1.1.519	GR	hCoV-19/Mexico/CMX-InDRE_230/2020	betacoronavirus	EPI_ISL_933707	2020-11-18	Mexico	Mexico City	29830	Human	31	Female
FMV		B.1.1.519	GR	hCoV-19/Mexico/CMX-INMEGEN-12-03-04/2020	betacoronavirus	EPI_ISL_955196	2020-11-20	Mexico	Mexico City	29782	Human	31	Male
FMV		B.1.1.519	GR	hCoV-19/Mexico/CMX-INMEGEN-12-03-13/2020	betacoronavirus	EPI_ISL_955203	2020-11-18	Mexico	Mexico City	29782	Human	20	Female
FMV		B.1.1.519	GR	hCoV-19/Mexico/CMX-INMEGEN-12-03-23/2020	betacoronavirus	EPI_ISL_955208	2020-11-19	Mexico	Mexico City	29782	Human	10	Female
FMV		B.1.1.523	G	hCoV-19/env/Austria/CeMM3682/2021	betacoronavirus	EPI_ISL_1008314	2021-01-31	Austria	Vienna	29782	Environment	unknown	unknown
FMV		B.1.1.523	G	hCoV-19/Switzerland/SO-ETHZ-470373/2021	betacoronavirus	EPI_ISL_1130286	2021-01-25	Switzerland	Solothurn	29847	Human	unknown	unknown
FMV		B.1.1.523	GR	hCoV-19/USA/NY-PRL-2021_03_01_01A12/2021	betacoronavirus	EPI_ISL_1172556	2021-02-26	USA	New York	29725	Human	36	Male
FMV		B.1.1.523	O	hCoV-19/Spain/CT-HUVH-90883/2021	betacoronavirus	EPI_ISL_1195240	2021-02-22	Spain	Catalunya	29867	Human	8	Male
FMV		B.1.1.523	G	hCoV-19/Germany/SN-RKI-I-032397/2021	betacoronavirus	EPI_ISL_1216580	2021-02-19	Germany	Saxony	29864	Human	unknown	unknown
FMV		B.1.1.523	G	hCoV-19/Italy/CAM-AMES-31-25/2021	betacoronavirus	EPI_ISL_1219093	2021-03-03	Italy	Campania	29320	Human	unknown	unknown
FMV		B.1.1.523	G	hCoV-19/Italy/CAM-AMES_33_53/2021	betacoronavirus	EPI_ISL_1229282	2021-03-01	Italy	Campania	29322	Human	1	Female
FMV		B.1.1.523	G	hCoV-19/Italy/CAM-AMES_33_70/2021	betacoronavirus	EPI_ISL_1229316	2021-03-02	Italy	Campania	29332	Human	37	Female
FMV		B.1.1.523	G	hCoV-19/Croatia/533/2021	betacoronavirus	EPI_ISL_1272029	2021-02-15	Croatia	Zagreb County	29595	Human	35	Male
FMV		B.1.1.523	GRY	hCoV-19/Israel/210757517/2021	betacoronavirus	EPI_ISL_1278486	2021-02-10	Israel		29764	Human	40-49	Male
FMV		B.1.1.523	G	hCoV-19/Italy/CAM-AMES-39-38/2021	betacoronavirus	EPI_ISL_1299040	2021-03-07	Italy	Campania	29331	Human	unknown	unknown
FMV		B.1.1.523	G	hCoV-19/Switzerland/BE-ETHZ-340029/2020	betacoronavirus	EPI_ISL_1496239	2020-10-23	Switzerland	Bern	29835	Human	unknown	unknown
FMV		B.1.1.523	G	hCoV-19/Finland/1538/2021	betacoronavirus	EPI_ISL_1497222	2021-02-08	Finland	Uusimaa	29833	Human	16	Female
FMV		B.1.1.523	GH	hCoV-19/USA/TX-GHRC-BV3-EQ04527243/2021	betacoronavirus	EPI_ISL_1528826	2021-02-05	USA	Texas	29836	Human	20	Male
FMV		B.1.1.523	O	hCoV-19/Germany/NW-RKI-I-065361/2021	betacoronavirus	EPI_ISL_1570462	2021-03-08	Germany	North Rhine-Westphalia	29709	Human	unknown	unknown
FMV		B.1.1.523	O	hCoV-19/Germany/NW-RKI-I-065363/2021	betacoronavirus	EPI_ISL_1570464	2021-03-08	Germany	North Rhine-Westphalia	29697	Human	unknown	unknown
FMV		B.1.1.523	O	hCoV-19/Germany/NW-RKI-I-065504/2021	betacoronavirus	EPI_ISL_1570605	2021-03-08	Germany	North Rhine-Westphalia	29702	Human	unknown	unknown
FMV		B.1.1.523	G	hCoV-19/Switzerland/AG-ETHZ-550052/2020	betacoronavirus	EPI_ISL_1598108	2020-12-07	Switzerland	Aargau	29864	Human	unknown	unknown
FMV		B.1.1.523	G	hCoV-19/Sweden/DC107832901/2021	betacoronavirus	EPI_ISL_1604475	2021-03-02	Sweden	Kalmar	29848	Human	unknown	unknown
FMV		B.1.1.523	GH	hCoV-19/Switzerland/BE-ETHZ-570088/2020	betacoronavirus	EPI_ISL_1657718	2020-12-16	Switzerland	Bern	29863	Human	unknown	unknown
FMV		B.1.1.523	G	hCoV-19/Switzerland/SH-ETHZ-570075/2020	betacoronavirus	EPI_ISL_1657741	2020-12-16	Switzerland	Schaffhausen	29864	Human	unknown	unknown
FMV		B.1.1.523	GR	hCoV-19/Russia/SVE-RII-MH15253S/2021	betacoronavirus	EPI_ISL_1664772	2021-02-19	Russia	Sverdlovsk	29773	Human	37	Male
FMV		B.1.1.523	G	hCoV-19/Qatar/QA-QU_18-4-G9/2021	betacoronavirus	EPI_ISL_1713659	2021-02-20	Qatar	Doha	29772	Human	41	Male
FMV		B.1.1.523	G	hCoV-19/India/DL-IGIB2010210562314/2021	betacoronavirus	EPI_ISL_1716798	2021-02-01	India	Delhi	29060	Human	45	Male
FMV		B.1.1.523	G	hCoV-19/Finland/V3015/2021	betacoronavirus	EPI_ISL_2031233	2021-02-22	Finland	Uusimaa	29834	Human	unknown	unknown
FMV		B.1.1.523	GR	hCoV-19/Russia/TAM-CRIE-L188F0166/2021	betacoronavirus	EPI_ISL_2031885	2021-03-05	Russia	Tambov	29730	Human	60	Female
FMV		B.1.1.523	GR	hCoV-19/SouthKorea/KDCA3563/2020	betacoronavirus	EPI_ISL_2161071	2020-11-02	South Korea		29730	Human	36	Male
FMV		B.1.1.523	GH	hCoV-19/USA/TX-HMH-MCoV-34702/2020	betacoronavirus	EPI_ISL_2215764	2020-12-01	USA	Texas	29799	Human	unknown	unknown
FMV		B.1.1.523	G	hCoV-19/USA/TX-HMH-MCoV-40922/2020	betacoronavirus	EPI_ISL_2224107	2020-07-22	USA	Texas	29716	Human	unknown	unknown
FMV		B.1.1.523	G	hCoV-19/USA/TX-HMH-MCoV-40953/2020	betacoronavirus	EPI_ISL_2224138	2020-07-22	USA	Texas	29748	Human	unknown	unknown
FMV		B.1.1.523	G	hCoV-19/France/PAC-IHU-3283_Illu1/2021	betacoronavirus	EPI_ISL_2286922	2021-02-01	France	Provence-Alpes-Cote d'Azur	29431	Human	unknown	unknown
FMV		B.1.1.523	GR	hCoV-19/Russia/MOW-CRIE-D186B0041/2021	betacoronavirus	EPI_ISL_2448704	2021-02-02	Russia	Moscow	29732	Human	66	Male
FMV		B.1.1.523	G	hCoV-19/India/PB-NCDC-1409375/2021	betacoronavirus	EPI_ISL_2504820	2021-02-17	India	Punjab	29726	Human	58	Female
FMV		B.1.1.523	G	hCoV-19/India/HP-NCDC-160916/2020	betacoronavirus	EPI_ISL_2505106	2020-12-14	India	Himachal Pradesh	29768	Human	45	Male
FMV		B.1.1.523	GR	hCoV-19/India/DL-NCDC-160983/2021	betacoronavirus	EPI_ISL_2505142	2021-02-10	India	Delhi	29578	Human	58	Female
FMV		B.1.1.523	GR	hCoV-19/USA/OR-PROV-900/2021	betacoronavirus	EPI_ISL_2551184	2021-03-01	USA	Oregon	29777	Human	unknown	Male
FMV		B.1.1.523	G	hCoV-19/India/UK-NCDC-1709111/2021	betacoronavirus	EPI_ISL_2556401	2021-02-03	India	Uttarakhand	29764	Human	54	Male
FMV		B.1.1.523	G	hCoV-19/India/UK-NCDC-1709114/2021	betacoronavirus	EPI_ISL_2556404	2021-02-14	India	Uttarakhand	29645	Human	36	Male
FMV		B.1.1.523	G	hCoV-19/India/DL-NCDC-1709146/2021	betacoronavirus	EPI_ISL_2556432	2021-02-08	India	Delhi	29763	Human	14	Male
FMV		B.1.1.523	G	hCoV-19/India/RJ-NCDC-1809145/2020	betacoronavirus	EPI_ISL_2556676	2020-09-02	India	Rajasthan	29758	Human	70	Male
FMV		B.1.1.523	G	hCoV-19/Finland/V6301/2021	betacoronavirus	EPI_ISL_2609454	2021-03-05	Finland	Uusimaa	29837	Human	unknown	unknown
FMV		B.1.1.523	GR	hCoV-19/Russia/MOW-CRIE-D186B0049/2021	betacoronavirus	EPI_ISL_2626349	2021-02-27	Russia	Moscow	29740	Human	1	Male
FMV		B.1.1.523	GR	hCoV-19/Russia/MOW-CRIE-D186B0049b/2021	betacoronavirus	EPI_ISL_2626431	2021-01-02	Russia	Moscow	29732	Human	61	Female
FMV		B.1.1.523	S	hCoV-19/Ghana/UHAS-BB139/2021	betacoronavirus	EPI_ISL_2864613	2021-02-05	Ghana	Volta	29611	Human	81	Male
FMV		B.1.1.523	GR	hCoV-19/Russia/MOW-CRIE-L106F0704ubh/2021	betacoronavirus	EPI_ISL_3101265	2021-02-10	Russia	Moscow	29734	Human	33	Female
FMV		B.1.1.523	GR	hCoV-19/Russia/MOS-CRIE-L189E1901ubh/2021	betacoronavirus	EPI_ISL_3101304	2021-02-09	Russia	Moscow Region	29758	Human	49	Female
FMV		B.1.1.523	G	hCoV-19/env/USA/CA-SEARCH-40188/2021	betacoronavirus	EPI_ISL_3231728	2021-02-19	USA	California	29833	Environment	N/A	N/A
FMV		B.1.1.523	G	hCoV-19/env/USA/CA-SEARCH-18394/2021	betacoronavirus	EPI_ISL_3231730	2021-02-25	USA	California	29771	Environment	N/A	N/A
FMV		B.1.1.523	G	hCoV-19/USA/FL-Miami-975/2021	betacoronavirus	EPI_ISL_4563070	2021-02-01	USA	Florida	29799	Human	unknown	unknown
FMV		B.1.1.523	GH	hCoV-19/USA/TX-HMH-MCoV-42627/2020	betacoronavirus	EPI_ISL_5074081	2020-07-19	USA	Texas	29832	Human	unknown	unknown
FMV		B.1.1.523	GR	hCoV-19/USA/TX-HMH-MCoV-49490/2020	betacoronavirus	EPI_ISL_5384262	2020-07-13	USA	Texas	29723	Human	unknown	unknown
FMV		B.1.1.523	GR	hCoV-19/USA/TX-HMH-MCoV-49795/2020	betacoronavirus	EPI_ISL_5384576	2020-07-16	USA	Texas	29776	Human	unknown	unknown
FMV		B.1.1.523	G	hCoV-19/England/LIVE-DF17D3/2021	betacoronavirus	EPI_ISL_949708	2021-01-29	United Kingdom	England	29780	Human	unknown	unknown
FMV		B.1.214.2	G	hCoV-19/Switzerland/BE-ETHZ-430578/2020	betacoronavirus	EPI_ISL_1129705	2020-12-30	Switzerland	Bern	29795	Human	unknown	unknown
FMV		B.1.214.2	G	hCoV-19/Switzerland/BL-ETHZ-431137/2020	betacoronavirus	EPI_ISL_1129772	2020-12-30	Switzerland	Basel-Landschaft	29798	Human	unknown	unknown
FMV		B.1.214.2	G	hCoV-19/Switzerland/BL-ETHZ-431019/2020	betacoronavirus	EPI_ISL_1129921	2020-12-28	Switzerland	Basel-Landschaft	29826	Human	unknown	unknown
FMV		B.1.214.2	G	hCoV-19/Switzerland/BL-UHB-65267663/2020	betacoronavirus	EPI_ISL_1296843	2020-11-22	Switzerland	Basel-Landschaft	29821	Human	unknown	unknown
FMV		B.1.214.2	G	hCoV-19/Togo/C5455/2020	betacoronavirus	EPI_ISL_1508956	2020-12-24	Togo	Lome	29858	Human	51	Male
FMV		B.1.214.2	G	hCoV-19/Switzerland/BL-ETHZ-571236/2020	betacoronavirus	EPI_ISL_1659198	2020-12-19	Switzerland	Basel-Landschaft	29839	Human	unknown	unknown
FMV		B.1.214.2	G	hCoV-19/Switzerland/BL-ETHZ-580820/2020	betacoronavirus	EPI_ISL_1750674	2020-12-28	Switzerland	Basel-Landschaft	29780	Human	unknown	unknown
FMV		B.1.214.2	G	hCoV-19/England/ALDP-CB0759/2020	betacoronavirus	EPI_ISL_760951	2020-12-05	United Kingdom	England	29750	Human	unknown	unknown
FMV		B.1.214.2	G	hCoV-19/France/un-20122280531/2020	betacoronavirus	EPI_ISL_913016	2020-12-28	France		29849	Human	79	Female
FMV		B.1.427&B.1.429	GH/452R.V1	hCoV-19/USA/CA-ACPHD-00310/2020	betacoronavirus	EPI_ISL_2304313	2020-04-11	USA	California	29782	Human	unknown	unknown
FMV		B.1.427&B.1.429	GH/452R.V1	hCoV-19/USA/NV-NSPHL-357909/2020	betacoronavirus	EPI_ISL_1675148	2020-04-15	USA	Nevada	29782	Human	30	unknown
FMV		B.1.466.2	GH	hCoV-19/Indonesia/JK-NIHRD-C00-21-00174/2020	betacoronavirus	EPI_ISL_1118206	2020-12-31	Indonesia	Jakarta	29834	Human	34	Female
FMV		B.1.466.2	GH	hCoV-19/Indonesia/KS-NIHRD-WGS00908/2020	betacoronavirus	EPI_ISL_1257851	2020-12-15	Indonesia	South Kalimantan	29834	Human	30	Male
FMV		B.1.466.2	GH	hCoV-19/Indonesia/KS-NIHRD-WGS00914/2020	betacoronavirus	EPI_ISL_1257852	2020-12-15	Indonesia	South Kalimantan	29834	Human	22	Female
FMV		B.1.466.2	GH	hCoV-19/Indonesia/SB-61-FKUA/2020	betacoronavirus	EPI_ISL_1533080	2020-12-02	Indonesia	West Sumatra	29859	Human	30	Female
FMV		B.1.466.2	GH	hCoV-19/Indonesia/BA-EIJK-UNWAR-165/2020	betacoronavirus	EPI_ISL_2101175	2020-12-29	Indonesia	Bali	29782	Human	30	Female
FMV		B.1.466.2	GH	hCoV-19/Indonesia/BA-EIJK-UNWAR-168/2020	betacoronavirus	EPI_ISL_2101178	2020-12-29	Indonesia	Bali	29782	Human	25	Female
FMV		B.1.466.2	GH	hCoV-19/Indonesia/BA-EIJK-UNWAR-174/2020	betacoronavirus	EPI_ISL_2101184	2020-12-30	Indonesia	Bali	29782	Human	46	Female
FMV		B.1.466.2	GH	hCoV-19/Indonesia/BA-EIJK-UNWAR-194/2020	betacoronavirus	EPI_ISL_2101205	2020-12-31	Indonesia	Bali	29782	Human	25	Female
FMV		B.1.466.2	GH	hCoV-19/Indonesia/BA-EIJK-UNWAR-201/2020	betacoronavirus	EPI_ISL_2101212	2020-12-31	Indonesia	Bali	29782	Human	15	Female
FMV		B.1.466.2	GH	hCoV-19/Indonesia/BA-EIJK-UNWAR-202/2020	betacoronavirus	EPI_ISL_2101213	2020-12-31	Indonesia	Bali	29782	Human	20	Female
FMV		B.1.466.2	GH	hCoV-19/Indonesia/BA-EIJK-UNWAR-284/2020	betacoronavirus	EPI_ISL_2101262	2020-12-30	Indonesia	Bali	29782	Human	47	Female
FMV		B.1.466.2	GH	hCoV-19/Indonesia/BA-EIJK-UNWAR-285/2020	betacoronavirus	EPI_ISL_2101263	2020-12-30	Indonesia	Bali	29782	Human	19	Male
FMV		B.1.466.2	GH	hCoV-19/Indonesia/NT-GS-GSILab-EOCRU-700439/2020	betacoronavirus	EPI_ISL_4417839	2020-12-15	Indonesia	East Nusa Tenggara	29782	Human	64	Female
FMV		B.1.466.2	GH	hCoV-19/Indonesia/NT-GS-GSILab-EOCRU-700436/2020	betacoronavirus	EPI_ISL_4417841	2020-11-30	Indonesia	East Nusa Tenggara	29776	Human	36	Female
FMV		B.1.466.2	GH	hCoV-19/Indonesia/NT-GS-GSILab-EOCRU-713940/2020	betacoronavirus	EPI_ISL_4491514	2020-11-21	Indonesia	East Nusa Tenggara	29782	Human	47	Female
FMV		B.1.466.2	GH	hCoV-19/Indonesia/JB-GS-WJHL-ITB-GS-032/2020	betacoronavirus	EPI_ISL_7472504	2020-12-08	Indonesia	West Java	29866	Human	17	Female
FMV		B.1.466.2	GH	hCoV-19/Indonesia/JB-GS-WJHL-ITB-GS-053/2020	betacoronavirus	EPI_ISL_7472518	2020-12-18	Indonesia	West Java	29867	Human	30	Female
FMV		B.1.466.2	GH	hCoV-19/Indonesia/JB-GS-WJHL-ITB-GS-257/2020	betacoronavirus	EPI_ISL_7472579	2020-11-10	Indonesia	West Java	29892	Human	37	Male
FMV		B.1.466.2	GH	hCoV-19/Indonesia/JB-GS-WJHL-ITB-GS-323/2020	betacoronavirus	EPI_ISL_7472609	2020-12-12	Indonesia	West Java	29866	Human	1	Male
FMV		B.1.466.2	GH	hCoV-19/Indonesia/JI-ITDua-33281NT/2020	betacoronavirus	EPI_ISL_877419	2020-12-11	Indonesia	East Java	29890	Human	60	Female
FMV		B.1.466.2	GH	hCoV-19/Indonesia/JI-ITDua-33807NT/2020	betacoronavirus	EPI_ISL_877456	2020-12-16	Indonesia	East Java	29877	Human	26	Female
FMV		B.1.466.2	GH	hCoV-19/Indonesia/JB-EIJK70/2020	betacoronavirus	EPI_ISL_888986	2020-11-12	Indonesia	West Java	29779	Human	58	Male
FMV		B.1.466.2	GH	hCoV-19/Indonesia/BT-EIJK75/2020	betacoronavirus	EPI_ISL_888988	2020-11-18	Indonesia	Banten	29779	Human	23	Female
FMV		B.1.466.2	GH	hCoV-19/Indonesia/JB-EIJK100/2020	betacoronavirus	EPI_ISL_888993	2020-12-10	Indonesia	West Java	29779	Human	72	Male
FMV		B.1.466.2	GH	hCoV-19/Indonesia/JK-EIJK115/2020	betacoronavirus	EPI_ISL_888994	2020-12-29	Indonesia	Jakarta	29779	Human	23	Female
FMV		B.1.466.2	GH	hCoV-19/Indonesia/BT-EIJK134/2020	betacoronavirus	EPI_ISL_889003	2020-12-31	Indonesia	Banten	29779	Human	70	Male
FMV		B.1.466.2	GH	hCoV-19/Indonesia/JB-EIJK95/2020	betacoronavirus	EPI_ISL_889012	2020-12-05	Indonesia	West Java	29779	Human	27	Female
FMV		B.1.466.2	GH	hCoV-19/Indonesia/BT-EIJK110/2020	betacoronavirus	EPI_ISL_889016	2020-12-17	Indonesia	Banten	29779	Human	24	Female
FMV		B.1.619	G	hCoV-19/France/un-HMN-21022230290/2021	betacoronavirus	EPI_ISL_1085349	2021-02-14	France		29650	Human	60	Male
FMV		B.1.619	G	hCoV-19/France/un-HMN-21022030415/2021	betacoronavirus	EPI_ISL_1085533	2021-02-03	France		29803	Human	51	Female
FMV		B.1.619	G	hCoV-19/Belgium/UZA-UA-CV0633966637/2021	betacoronavirus	EPI_ISL_1112932	2021-02-20	Belgium	Hoboken	29865	Human	66	Male
FMV		B.1.619	G	hCoV-19/Belgium/ULG-12536/2021	betacoronavirus	EPI_ISL_1113136	2021-02-16	Belgium	Hainaut	29704	Human	26	Male
FMV		B.1.619	G	hCoV-19/Germany/BE-RKI-I-020766/2021	betacoronavirus	EPI_ISL_1150929	2021-02-11	Germany	Berlin	29809	Human	unknown	unknown
FMV		B.1.619	G	hCoV-19/Germany/BE-RKI-I-025618/2021	betacoronavirus	EPI_ISL_1155801	2021-02-18	Germany	Berlin	29846	Human	unknown	unknown
FMV		B.1.619	G	hCoV-19/USA/CT-CDC-LC0015522/2021	betacoronavirus	EPI_ISL_1163004	2021-02-10	USA	Connecticut	29701	Human	58	Male
FMV		B.1.619	G	hCoV-19/Switzerland/GE-33348849/2021	betacoronavirus	EPI_ISL_1166758	2021-02-22	Switzerland	Geneva	29845	Human	unknown	unknown
FMV		B.1.619	G	hCoV-19/USA/MD-MDH-1212/2021	betacoronavirus	EPI_ISL_1181991	2021-02-24	USA	Maryland	29889	Human	unknown	unknown
FMV		B.1.619	G	hCoV-19/Cameroon/Yaounde-ECO19/2021	betacoronavirus	EPI_ISL_1190756	2021-01-30	Cameroon	Yaounde	29854	Human	41	Male
FMV		B.1.619	G	hCoV-19/Cameroon/Yaounde-ECO31/2021	betacoronavirus	EPI_ISL_1190760	2021-02-04	Cameroon	Yaounde	29880	Human	59	Female
FMV		B.1.619	G	hCoV-19/Switzerland/NE-ETHZ-510344/2021	betacoronavirus	EPI_ISL_1195005	2021-02-22	Switzerland	Neuchatel	29818	Human	unknown	unknown
FMV		B.1.619	G	hCoV-19/Germany/BE-RKI-I-029688/2021	betacoronavirus	EPI_ISL_1212838	2021-02-15	Germany	Berlin	29863	Human	unknown	unknown
FMV		B.1.619	G	hCoV-19/Cameroon/Douala-HGDCOV1946/2021	betacoronavirus	EPI_ISL_1257883	2021-01-28	Cameroon	Douala	29315	Human	27	Male
FMV		B.1.619	G	hCoV-19/Cameroon/Douala-58420/2021	betacoronavirus	EPI_ISL_1257891	2021-02-05	Cameroon	Douala	29318	Human	50	Male
FMV		B.1.619	G	hCoV-19/Cameroon/Douala-58530/2021	betacoronavirus	EPI_ISL_1257892	2021-02-06	Cameroon	Douala	29318	Human	56	Male
FMV		B.1.619	G	hCoV-19/USA/MD-MDH-1297/2021	betacoronavirus	EPI_ISL_1272216	2021-02-12	USA	Maryland	29819	Human	unknown	unknown
FMV		B.1.619	G	hCoV-19/Belgium/UZA-UA-CV2008078640/2021	betacoronavirus	EPI_ISL_1298434	2021-02-24	Belgium	Hoboken	29889	Human	13	Male
FMV		B.1.619	G	hCoV-19/Belgium/UZA-UA-CV2076389070/2021	betacoronavirus	EPI_ISL_1298448	2021-02-24	Belgium	Hemiksem	29892	Human	36	Female
FMV		B.1.619	G	hCoV-19/Rwanda/NRLNAT3049/2021	betacoronavirus	EPI_ISL_1301735	2021-01-20	Rwanda	Kigali	29704	Human	41	Male
FMV		B.1.619	G	hCoV-19/Switzerland/NE-PMI-2105-6524/2021	betacoronavirus	EPI_ISL_1302829	2021-02-06	Switzerland	Neuchatel	29772	Human	unknown	Female
FMV		B.1.619	G	hCoV-19/Switzerland/NE-PMI-2106-2639/2021	betacoronavirus	EPI_ISL_1302853	2021-02-09	Switzerland	Neuchatel	29772	Human	unknown	Male
FMV		B.1.619	G	hCoV-19/Switzerland/NE-PMI-2106-4688/2021	betacoronavirus	EPI_ISL_1302859	2021-02-10	Switzerland	Neuchatel	29772	Human	unknown	Male
FMV		B.1.619	G	hCoV-19/Switzerland/NE-PMI-2106-4786/2021	betacoronavirus	EPI_ISL_1302860	2021-02-11	Switzerland	Neuchatel	29772	Human	unknown	Male
FMV		B.1.619	G	hCoV-19/Switzerland/NE-PMI-2106-4789/2021	betacoronavirus	EPI_ISL_1302861	2021-02-11	Switzerland	Neuchatel	29772	Human	unknown	Female
FMV		B.1.619	G	hCoV-19/Switzerland/NE-PMI-2106-4793/2021	betacoronavirus	EPI_ISL_1302862	2021-02-11	Switzerland	Neuchatel	29772	Human	unknown	Male
FMV		B.1.619	G	hCoV-19/Switzerland/NE-PMI-2108-0802/2021	betacoronavirus	EPI_ISL_1302889	2021-02-22	Switzerland	Neuchatel	29772	Human	unknown	Female
FMV		B.1.619	G	hCoV-19/Switzerland/NE-PMI-2108-1278/2021	betacoronavirus	EPI_ISL_1302898	2021-02-22	Switzerland	Neuchatel	29772	Human	unknown	Male
FMV		B.1.619	G	hCoV-19/Switzerland/NE-PMI-2108-2508/2021	betacoronavirus	EPI_ISL_1302912	2021-02-23	Switzerland	Neuchatel	29773	Human	unknown	Female
FMV		B.1.619	G	hCoV-19/Switzerland/NE-PMI-2108-3310/2021	betacoronavirus	EPI_ISL_1302914	2021-02-24	Switzerland	Neuchatel	29773	Human	unknown	Male
FMV		B.1.619	G	hCoV-19/Switzerland/NE-PMI-2108-3621/2021	betacoronavirus	EPI_ISL_1302919	2021-02-24	Switzerland	Neuchatel	29773	Human	unknown	Male
FMV		B.1.619	G	hCoV-19/Belgium/rega-3649/2021	betacoronavirus	EPI_ISL_1312169	2021-02-21	Belgium	Aarschot	29772	Human	12	Female
FMV		B.1.619	G	hCoV-19/Belgium/rega-3861/2021	betacoronavirus	EPI_ISL_1322646	2021-02-22	Belgium	Hoboken	29772	Human	41	Female
FMV		B.1.619	G	hCoV-19/Belgium/rega-3805/2021	betacoronavirus	EPI_ISL_1322717	2021-02-23	Belgium	Schaarbeek	29772	Human	40	Male
FMV		B.1.619	G	hCoV-19/USA/MN-MDH-4452/2021	betacoronavirus	EPI_ISL_1446026	2021-02-23	USA	Minnesota	29804	Human	unknown	unknown
FMV		B.1.619	G	hCoV-19/France/IDF-HMN-21032030219/2021	betacoronavirus	EPI_ISL_1672793	2021-02-18	France	Ile-de-France	29808	Human	32	Female
FMV		B.1.619	G	hCoV-19/France/IDF-HMN-21032100375/2021	betacoronavirus	EPI_ISL_1706854	2021-02-16	France	Ile-de-France	29798	Human	33	Male
FMV		B.1.619	G	hCoV-19/Cameroon/CV994/2021	betacoronavirus	EPI_ISL_1715197	2021-02-03	Cameroon	Yaounde	29824	Human	27	Male
FMV		B.1.619	G	hCoV-19/Cameroon/Douala-57930/2021	betacoronavirus	EPI_ISL_1790064	2021-02-04	Cameroon	Douala	29789	Human	28	Male
FMV		B.1.619	G	hCoV-19/Cameroon/Douala-58478/2021	betacoronavirus	EPI_ISL_1790066	2021-02-06	Cameroon	Douala	29413	Human	29	Female
FMV		B.1.619	G	hCoV-19/Cameroon/Douala-58593/2021	betacoronavirus	EPI_ISL_1790067	2021-02-06	Cameroon	Douala	29829	Human	40	Female
FMV		B.1.619	G	hCoV-19/Cameroon/Yaounde-21V-06642/2021	betacoronavirus	EPI_ISL_1790116	2021-02-06	Cameroon	Yaounde	29547	Human	65	Male
FMV		B.1.619	G	hCoV-19/Cameroon/Yaounde-21V-06836/2021	betacoronavirus	EPI_ISL_1790119	2021-02-08	Cameroon	Yaounde	29810	Human	46	Male
FMV		B.1.619	G	hCoV-19/Cameroon/Yaounde-21V-08001/2021	betacoronavirus	EPI_ISL_1790128	2021-02-18	Cameroon	Yaounde	29740	Human	28	Male
FMV		B.1.619	G	hCoV-19/Cameroon/Yaounde-21V-08190/2021	betacoronavirus	EPI_ISL_1790132	2021-02-19	Cameroon	Yaounde	29846	Human	38	Female
FMV		B.1.619	G	hCoV-19/Belgium/UZA-UA-CV2007546655/2021	betacoronavirus	EPI_ISL_1841406	2021-02-19	Belgium	Wilrijk	29813	Human	5	Female
FMV		B.1.619	O	hCoV-19/CentralAfricanRepublic/23960/2020	betacoronavirus	EPI_ISL_2281232	2020-12-11	Central African Republic		29592	Human	44	Male
FMV		B.1.619	G	hCoV-19/USA/AZ-TG862518/2021	betacoronavirus	EPI_ISL_2281364	2021-02-22	USA	Arizona	29859	Human	unknown	unknown
FMV		B.1.619	G	hCoV-19/Switzerland/VD-CHUV-GEN3192/2021	betacoronavirus	EPI_ISL_2359952	2021-01-01	Switzerland	Vaud	29733	Human	unknown	unknown
FMV		B.1.619	G	hCoV-19/SouthKorea/KDCA4322/2021	betacoronavirus	EPI_ISL_2361092	2021-02-18	South Korea		29835	Human	34	Male
FMV		B.1.619	G	hCoV-19/USA/CA-CDPH-2000034129/2021	betacoronavirus	EPI_ISL_2782590	2021-01-27	USA	California	29859	Human	unknown	unknown
FMV		B.1.619	G	hCoV-19/USA/CA-CDPH-2000034191/2021	betacoronavirus	EPI_ISL_2797032	2021-01-27	USA	California	29866	Human	unknown	unknown
FMV		B.1.619	G	hCoV-19/Belgium/rega-7852/2021	betacoronavirus	EPI_ISL_2832460	2021-01-23	Belgium	Walshoutem	29772	Human	52	Female
FMV		B.1.619	S	hCoV-19/Madagascar/IPM-21067/2020	betacoronavirus	EPI_ISL_3716504	2020-07-06	Madagascar	Toliara	29584	Human	67	Female
FMV		B.1.619	G	hCoV-19/Madagascar/IPM-24500/2020	betacoronavirus	EPI_ISL_3716550	2020-07-13	Madagascar	Antsiranana	29841	Human	40	Female
FMV		B.1.619	G	hCoV-19/Switzerland/NE-PMI-2102-6206/2021	betacoronavirus	EPI_ISL_934981	2021-01-16	Switzerland	Neuchatel	29734	Human	56	Male
FMV		B.1.620	G	hCoV-19/Belgium/ULG-12917/2021	betacoronavirus	EPI_ISL_1241728	2021-03-01	Belgium	Li??ge	29684	Human	unknown	Male
FMV		B.1.620	G	hCoV-19/England/CAMC-1382B1E/2021	betacoronavirus	EPI_ISL_1242199	2021-03-01	United Kingdom	England	29739	Human	unknown	unknown
FMV		B.1.620	G	hCoV-19/England/CAMC-13B04C1/2021	betacoronavirus	EPI_ISL_1275749	2021-03-09	United Kingdom	England	29752	Human	unknown	unknown
FMV		B.1.620	G	hCoV-19/England/CAMC-139A928/2021	betacoronavirus	EPI_ISL_1275972	2021-03-04	United Kingdom	England	29464	Human	unknown	unknown
FMV		B.1.620	G	hCoV-19/England/CAMC-139AFAE/2021	betacoronavirus	EPI_ISL_1276088	2021-03-04	United Kingdom	England	29749	Human	unknown	unknown
FMV		B.1.620	G	hCoV-19/Germany/RP-RKI-I-037987/2021	betacoronavirus	EPI_ISL_1284252	2021-03-09	Germany	Rhineland-Palatinate	29789	Human	unknown	unknown
FMV		B.1.620	G	hCoV-19/England/CAMC-13AFBFD/2021	betacoronavirus	EPI_ISL_1316127	2021-03-06	United Kingdom	England	29752	Human	unknown	unknown
FMV		B.1.620	G	hCoV-19/England/CAMC-13D4360/2021	betacoronavirus	EPI_ISL_1327538	2021-03-12	United Kingdom	England	29752	Human	unknown	unknown
FMV		B.1.620	G	hCoV-19/England/CAMC-13B8441/2021	betacoronavirus	EPI_ISL_1329214	2021-03-10	United Kingdom	England	29752	Human	unknown	unknown
FMV		B.1.620	G	hCoV-19/England/CAMC-13B749D/2021	betacoronavirus	EPI_ISL_1329219	2021-03-08	United Kingdom	England	29752	Human	unknown	unknown
FMV		B.1.620	G	hCoV-19/England/CAMC-13B8423/2021	betacoronavirus	EPI_ISL_1329268	2021-03-10	United Kingdom	England	29752	Human	unknown	unknown
FMV		B.1.620	G	hCoV-19/Switzerland/GE-33576177/2021	betacoronavirus	EPI_ISL_1369646	2021-03-16	Switzerland	Geneva	29802	Human	unknown	unknown
FMV		B.1.620	G	hCoV-19/Belgium/rega-5050/2021	betacoronavirus	EPI_ISL_1382294	2021-03-14	Belgium	Sint-Joost-ten-Node	29752	Human	59	Male
FMV		B.1.620	G	hCoV-19/France/ARA-210013001901/2021	betacoronavirus	EPI_ISL_1406653	2021-02-26	France	Auvergne-Rhone-Alpes	29805	Human	43	Female
FMV		B.1.620	G	hCoV-19/France/PDL-IPP07069/2021	betacoronavirus	EPI_ISL_1495980	2021-03-18	France	Pays de la Loire	29752	Human	39	Female
FMV		B.1.620	G	hCoV-19/Belgium/UZA-UA-24912930/2021	betacoronavirus	EPI_ISL_1498300	2021-03-15	Belgium	Neder-Over-Heembeek	29887	Human	38	Male
FMV		B.1.620	G	hCoV-19/Lithuania/LSMULKKGMMK10C167/2021	betacoronavirus	EPI_ISL_1540680	2021-03-15	Lithuania	Vilnius	29847	Human	unknown	Male
FMV		B.1.620	G	hCoV-19/Lithuania/LSMULKKGMMK10C170/2021	betacoronavirus	EPI_ISL_1540683	2021-03-15	Lithuania	Vilnius	29848	Human	unknown	Female
FMV		B.1.620	G	hCoV-19/Germany/NI-RKI-I-059759/2021	betacoronavirus	EPI_ISL_1565237	2021-03-22	Germany	Lower Saxony	29822	Human	unknown	unknown
FMV		B.1.620	G	hCoV-19/Lithuania/LTU000_NMVRI55624/2021	betacoronavirus	EPI_ISL_1579527	2021-03-21	Lithuania	Vilniaus apskritis	29840	Human	55	Male
FMV		B.1.620	G	hCoV-19/Lithuania/LTU000_NMVRI56199/2021	betacoronavirus	EPI_ISL_1579571	2021-03-21	Lithuania	Vilniaus apskritis	29798	Human	36	Male
FMV		B.1.620	G	hCoV-19/Lithuania/LTU000_NMVRI54583/2021	betacoronavirus	EPI_ISL_1579607	2021-03-18	Lithuania	Vilniaus apskritis	29520	Human	31	Female
FMV		B.1.620	G	hCoV-19/Lithuania/LTU000_MB20223/2021	betacoronavirus	EPI_ISL_1579691	2021-03-16	Lithuania	Utenos apskritis	29839	Human	83	Female
FMV		B.1.620	G	hCoV-19/Lithuania/LTU000_NMVRI53742/2021	betacoronavirus	EPI_ISL_1579784	2021-03-16	Lithuania	Vilniaus apskritis	29782	Human	60	Female
FMV		B.1.620	G	hCoV-19/Lithuania/LTU000_NMVRI56871/2021	betacoronavirus	EPI_ISL_1579903	2021-03-22	Lithuania	Vilniaus apskritis	29837	Human	32	Female
FMV		B.1.620	G	hCoV-19/England/PORT-1E7B48B/2021	betacoronavirus	EPI_ISL_1638013	2021-03-22	United Kingdom	England	29755	Human	unknown	unknown
FMV		B.1.620	G	hCoV-19/Lithuania/LTU000_MB22164/2021	betacoronavirus	EPI_ISL_1656854	2021-03-24	Lithuania	Utenos	29837	Human	78	Male
FMV		B.1.620	G	hCoV-19/EquatorialGuinea/91946/2021	betacoronavirus	EPI_ISL_1673323	2021-02-06	Equatorial Guinea		29751	Human	unknown	unknown
FMV		B.1.620	G	hCoV-19/Belgium/UGent-4359/2021	betacoronavirus	EPI_ISL_1688635	2021-03-23	Belgium	Ghent	29752	Human	22	Male
FMV		B.1.620	G	hCoV-19/Belgium/UGent-4369/2021	betacoronavirus	EPI_ISL_1688660	2021-03-23	Belgium	Ghent	29752	Human	19	Female
FMV		B.1.620	G	hCoV-19/Cameroon/Yaounde-21V-07104/2021	betacoronavirus	EPI_ISL_1790123	2021-02-10	Cameroon	Yaounde	29783	Human	58	Male
FMV		B.1.620	G	hCoV-19/Cameroon/CAM-01/2021	betacoronavirus	EPI_ISL_1972305	2021-03-02	Cameroon	Yaounde	29804	Human	37	Female
FMV		B.1.620	G	hCoV-19/Cameroon/CAM-02/2021	betacoronavirus	EPI_ISL_1972306	2021-03-02	Cameroon	Yaounde	29795	Human	29	Female
FMV		B.1.620	G	hCoV-19/Cameroon/CAM057/2021	betacoronavirus	EPI_ISL_1972320	2021-03-03	Cameroon	Yaounde	29771	Human	unknown	unknown
FMV		B.1.620	G	hCoV-19/Cameroon/CAM077/2021	betacoronavirus	EPI_ISL_1972325	2021-03-01	Cameroon	Yaounde	29628	Human	unknown	unknown
FMV		B.1.620	G	hCoV-19/Philippines/PH-PGC-11583/2021	betacoronavirus	EPI_ISL_2171204	2021-03-09	Philippines	Central Visayas	29788	Human	32	Female
FMV		B.1.620	G	hCoV-19/Philippines/PH-PGC-11588/2021	betacoronavirus	EPI_ISL_2188829	2021-03-09	Philippines	Central Visayas	29851	Human	43	Male
FMV		B.1.620	G	hCoV-19/France/OCC-CHU-TLS-210611244701/2021	betacoronavirus	EPI_ISL_2278470	2021-02-25	France	Hautes-Pyrenees	29776	Human	13	Female
FMV		B.1.620	G	hCoV-19/CentralAfricanRepublic/24390/2021	betacoronavirus	EPI_ISL_2281255	2021-03-08	Central African Republic		29786	Human	72	Female
FMV		B.1.620	G	hCoV-19/CentralAfricanRepublic/24407/2021	betacoronavirus	EPI_ISL_2281260	2021-03-10	Central African Republic		29838	Human	49	Male
FMV		B.1.620	G	hCoV-19/CentralAfricanRepublic/24449/2021	betacoronavirus	EPI_ISL_2281267	2021-03-15	Central African Republic		29827	Human	53	Male
FMV		B.1.620	G	hCoV-19/CentralAfricanRepublic/24451/2021	betacoronavirus	EPI_ISL_2281268	2021-03-15	Central African Republic		29838	Human	30	Female
FMV		B.1.620	G	hCoV-19/CentralAfricanRepublic/24452/2021	betacoronavirus	EPI_ISL_2281269	2021-03-15	Central African Republic		29784	Human	55	Male
FMV		B.1.620	G	hCoV-19/CentralAfricanRepublic/24473/2021	betacoronavirus	EPI_ISL_2281271	2021-03-16	Central African Republic		29814	Human	27	Female
FMV		B.1.620	G	hCoV-19/CentralAfricanRepublic/24474/2021	betacoronavirus	EPI_ISL_2281272	2021-03-16	Central African Republic		29835	Human	47	Female
FMV		B.1.620	G	hCoV-19/CentralAfricanRepublic/24505/2021	betacoronavirus	EPI_ISL_2281276	2021-03-18	Central African Republic		29826	Human	23	Female
FMV		B.1.620	G	hCoV-19/CentralAfricanRepublic/24507/2021	betacoronavirus	EPI_ISL_2281277	2021-03-18	Central African Republic		29821	Human	59	Female
FMV		B.1.620	G	hCoV-19/CentralAfricanRepublic/24476/2021	betacoronavirus	EPI_ISL_2281280	2021-03-18	Central African Republic		29808	Human	unknown	Male
FMV		B.1.620	G	hCoV-19/CentralAfricanRepublic/245/2021	betacoronavirus	EPI_ISL_2365413	2021-03-02	Central African Republic	Bayanga	29752	Human	unknown	unknown
FMV		B.1.620	G	hCoV-19/Belgium/rega-5987/2021	betacoronavirus	EPI_ISL_2404477	2021-03-15	Belgium	Neder-Over-Heembeek	29464	Human	28	Female
FMV		B.1.620	G	hCoV-19/France/IDF-HB_112105007545/2021	betacoronavirus	EPI_ISL_2467769	2021-02-05	France	Ile-de-France	29756	Human	unknown	unknown
FMV		B.1.620	G	hCoV-19/Luxembourg/LNS8630070/2021	betacoronavirus	EPI_ISL_3145495	2021-03-17	Luxembourg		29688	Human	26	Female
FMV		B.1.620	G	hCoV-19/Gabon/LPDG364/2021	betacoronavirus	EPI_ISL_3356351	2021-03-07	Gabon	Libreville	29684	Human	18	Male
FMV		B.1.620	O	hCoV-19/France/PAC-IHU-22794-N1/2021	betacoronavirus	EPI_ISL_3802271	2021-03-12	France	Marseille	29755	Human	unknown	unknown
FMV		B.1.620	G	hCoV-19/Cameroon/NPHL-NS2.7/2021	betacoronavirus	EPI_ISL_4345144	2021-03-12	Cameroon	Centre	29755	Human	26	Male
FMV		C.36.3	GR	hCoV-19/England/CAMC-1322D38/2021	betacoronavirus	EPI_ISL_1246276	2021-02-22	United Kingdom	England	29775	Human	unknown	unknown
FMV		C.36.3	GR	hCoV-19/Italy/LOM-UnINSU/2021	betacoronavirus	EPI_ISL_1509923	2021-02-20	Italy	Lombardy	29713	Human	81	Female
FMV		C.36.3	GR	hCoV-19/Israel/CVL-7920/2021	betacoronavirus	EPI_ISL_2083186	2021-02-28	Israel		29838	Human	unknown	unknown
FMV		C.36.3	GR	hCoV-19/Israel/CVL-7921/2021	betacoronavirus	EPI_ISL_2083187	2021-02-28	Israel		29853	Human	unknown	unknown
FMV		C.36.3	GR	hCoV-19/Egypt/CCHE57357_Wave_3_A006/2021	betacoronavirus	EPI_ISL_2566471	2021-03-01	Egypt		29903	Human	unknown	unknown
FMV		C.36.3	GR	hCoV-19/Egypt/CCHE57357_Wave_3_A049/2021	betacoronavirus	EPI_ISL_2566498	2021-03-01	Egypt		29903	Human	unknown	unknown
FMV		C.36.3	GR	hCoV-19/Egypt/CCHE57357_Wave_3_A050/2021	betacoronavirus	EPI_ISL_2566499	2021-03-01	Egypt		29903	Human	unknown	unknown
FMV		C.36.3	GR	hCoV-19/Jordan/Biolab0089/2021	betacoronavirus	EPI_ISL_2658768	2021-01-26	Jordan	Amman	29793	Human	unknown	unknown
FMV		C.36.3	GR	hCoV-19/Egypt/CPHL-A4/2021	betacoronavirus	EPI_ISL_3274160	2021-01-06	Egypt	Sohage	29829	Human	46	Male
FMV		C.36.3	GR	hCoV-19/USA/CA-CDPH-2000019057/2021	betacoronavirus	EPI_ISL_3460757	2021-01-04	USA	California	29791	Human	unknown	unknown
FMV		P.2	GR/484K.V2	hCoV-19/Brazil/RJ-FIOCRUZ-2188-1P/2020	betacoronavirus	EPI_ISL_2157561	2020-04-13	Brazil	Rio de Janeiro	29778	Human	unknown	Female
FMV		P.2	GR/484K.V2	hCoV-19/Brazil/SP-2733R2/2020	betacoronavirus	EPI_ISL_2614543	2020-05-29	Brazil	Sao Paulo	29768	Human	41	Female
FMV		P.2	GR/484K.V2	hCoV-19/Brazil/PA-ITV-17/2020	betacoronavirus	EPI_ISL_3356365	2020-05-04	Brazil	Para	29823	Human	61	Male
FMV		P.2	GR/484K.V2	hCoV-19/Brazil/CE-IEC-177339/2020	betacoronavirus	EPI_ISL_918536	2020-04-15	Brazil	Ceara	29779	Human	50	Male
FMV		P.3	GR	hCoV-19/Philippines/PH-PGC-04810/2021	betacoronavirus	EPI_ISL_1122426	2021-02-02	Philippines	Central Visayas	29876	Human	34	Male
FMV		P.3	GR	hCoV-19/Philippines/PH-PGC-04829/2021	betacoronavirus	EPI_ISL_1122427	2021-02-01	Philippines	Central Visayas	29830	Human	45	Female
FMV		P.3	GR	hCoV-19/Philippines/PH-PGC-04833/2021	betacoronavirus	EPI_ISL_1122428	2021-02-02	Philippines	Central Visayas	29809	Human	48	Female
FMV		P.3	GR	hCoV-19/Philippines/PH-PGC-04778/2021	betacoronavirus	EPI_ISL_1122429	2021-02-01	Philippines	Central Visayas	29849	Human	17	Male
FMV		P.3	GR	hCoV-19/Philippines/PH-PGC-04779/2021	betacoronavirus	EPI_ISL_1122430	2021-02-01	Philippines	Central Visayas	29849	Human	7	Male
FMV		P.3	GR	hCoV-19/Philippines/PH-PGC-04780/2021	betacoronavirus	EPI_ISL_1122431	2021-02-01	Philippines	Central Visayas	29877	Human	16	Female
FMV		P.3	GR	hCoV-19/Philippines/PH-PGC-04781/2021	betacoronavirus	EPI_ISL_1122432	2021-02-01	Philippines	Central Visayas	29877	Human	13	Male
FMV		P.3	GR	hCoV-19/Philippines/PH-PGC-04782/2021	betacoronavirus	EPI_ISL_1122433	2021-02-02	Philippines	Central Visayas	29853	Human	11	Female
FMV		P.3	GR	hCoV-19/Philippines/PH-PGC-04783/2021	betacoronavirus	EPI_ISL_1122434	2021-02-02	Philippines	Central Visayas	29857	Human	11	Male
FMV		P.3	GR	hCoV-19/Philippines/PH-PGC-04784/2021	betacoronavirus	EPI_ISL_1122435	2021-02-02	Philippines	Central Visayas	29850	Human	7	Male
FMV		P.3	GR	hCoV-19/Philippines/PH-PGC-04785/2021	betacoronavirus	EPI_ISL_1122436	2021-01-31	Philippines	Central Visayas	29840	Human	36	Male
FMV		P.3	GR	hCoV-19/Philippines/PH-PGC-04789/2021	betacoronavirus	EPI_ISL_1122437	2021-02-01	Philippines	Central Visayas	29855	Human	39	Male
FMV		P.3	GR	hCoV-19/Philippines/PH-PGC-04792/2021	betacoronavirus	EPI_ISL_1122438	2021-02-01	Philippines	Central Visayas	29852	Human	63	Male
FMV		P.3	GR	hCoV-19/Philippines/PH-PGC-04793/2021	betacoronavirus	EPI_ISL_1122439	2021-02-01	Philippines	Central Visayas	29812	Human	25	Female
FMV		P.3	GR	hCoV-19/Philippines/PH-PGC-04797/2021	betacoronavirus	EPI_ISL_1122440	2021-02-01	Philippines	Central Visayas	29853	Human	39	Female
FMV		P.3	GR	hCoV-19/Philippines/PH-PGC-04798/2021	betacoronavirus	EPI_ISL_1122441	2021-02-01	Philippines	Central Visayas	29856	Human	69	Female
FMV		P.3	GR	hCoV-19/Philippines/PH-PGC-04799/2021	betacoronavirus	EPI_ISL_1122442	2021-02-01	Philippines	Central Visayas	29857	Human	32	Female
FMV		P.3	GR	hCoV-19/Philippines/PH-PGC-04800/2021	betacoronavirus	EPI_ISL_1122443	2021-02-01	Philippines	Central Visayas	29804	Human	51	Male
FMV		P.3	GR	hCoV-19/Philippines/PH-PGC-04801/2021	betacoronavirus	EPI_ISL_1122444	2021-02-01	Philippines	Central Visayas	29805	Human	26	Male
FMV		P.3	GR	hCoV-19/Philippines/PH-PGC-04804/2021	betacoronavirus	EPI_ISL_1122445	2021-02-01	Philippines	Central Visayas	29870	Human	64	Female
FMV		P.3	GR	hCoV-19/Philippines/PH-PGC-04805/2021	betacoronavirus	EPI_ISL_1122446	2021-02-01	Philippines	Central Visayas	29811	Human	35	Female
FMV		P.3	GR	hCoV-19/Philippines/PH-PGC-04806/2021	betacoronavirus	EPI_ISL_1122447	2021-02-02	Philippines	Central Visayas	29855	Human	20	Male
FMV		P.3	GR	hCoV-19/Philippines/PH-PGC-04808/2021	betacoronavirus	EPI_ISL_1122448	2021-02-02	Philippines	Central Visayas	29813	Human	28	Female
FMV		P.3	GR	hCoV-19/Philippines/PH-PGC-04811/2021	betacoronavirus	EPI_ISL_1122449	2021-02-02	Philippines	Central Visayas	29881	Human	45	Female
FMV		P.3	GR	hCoV-19/Philippines/PH-PGC-04813/2021	betacoronavirus	EPI_ISL_1122450	2021-02-02	Philippines	Central Visayas	29877	Human	39	Female
FMV		P.3	GR	hCoV-19/Philippines/PH-PGC-04816/2021	betacoronavirus	EPI_ISL_1122451	2021-01-31	Philippines	Central Visayas	29855	Human	31	Female
FMV		P.3	GR	hCoV-19/Philippines/PH-PGC-04820/2021	betacoronavirus	EPI_ISL_1122452	2021-02-01	Philippines	Central Visayas	29809	Human	35	Male
FMV		P.3	GR	hCoV-19/Philippines/PH-PGC-04828/2021	betacoronavirus	EPI_ISL_1122453	2021-02-01	Philippines	Central Visayas	29833	Human	66	Female
FMV		P.3	GR	hCoV-19/Philippines/PH-PGC-04830/2021	betacoronavirus	EPI_ISL_1122454	2021-02-01	Philippines	Central Visayas	29786	Human	44	Male
FMV		P.3	GR	hCoV-19/Philippines/PH-PGC-04290/2021	betacoronavirus	EPI_ISL_1122455	2021-01-23	Philippines	Davao Region	29850	Human	42	Male
FMV		P.3	GR	hCoV-19/Philippines/PH-PGC-04430/2021	betacoronavirus	EPI_ISL_1122456	2021-01-28	Philippines	National Capital Region	29811	Human	36	Male
FMV		P.3	GR	hCoV-19/Philippines/PH-PGC-04222/2021	betacoronavirus	EPI_ISL_1122457	2021-02-01	Philippines	National Capital Region	29805	Human	31	Female
FMV		P.3	GR	hCoV-19/Philippines/PH-PGC-02772/2021	betacoronavirus	EPI_ISL_1122458	2021-01-16	Philippines	National Capital Region	29796	Human	47	Male
FMV		P.3	GR	hCoV-19/Philippines/PH-PGC-06698/2021	betacoronavirus	EPI_ISL_1213504	2021-02-03	Philippines	Central Visayas	29803	Human	36	Female
FMV		P.3	GR	hCoV-19/Philippines/PH-PGC-06695/2021	betacoronavirus	EPI_ISL_1213509	2021-02-03	Philippines	Central Visayas	29800	Human	31	Male
FMV		P.3	GR	hCoV-19/Philippines/PH-PGC-06694/2021	betacoronavirus	EPI_ISL_1213518	2021-02-03	Philippines	Central Visayas	29804	Human	40	Female
FMV		P.3	GR	hCoV-19/Philippines/PH-PGC-06697/2021	betacoronavirus	EPI_ISL_1213521	2021-02-03	Philippines	Central Visayas	29801	Human	37	Female
FMV		P.3	GR	hCoV-19/Philippines/PH-PGC-06700/2021	betacoronavirus	EPI_ISL_1213523	2021-02-04	Philippines	Central Visayas	29801	Human	25	Male
FMV		P.3	GR	hCoV-19/Philippines/PH-PGC-06699/2021	betacoronavirus	EPI_ISL_1213524	2021-02-04	Philippines	Central Visayas	29794	Human	47	Male
FMV		P.3	GR	hCoV-19/Philippines/PH-PGC-06696/2021	betacoronavirus	EPI_ISL_1213531	2021-02-03	Philippines	Central Visayas	29799	Human	43	Male
FMV		P.3	GR	hCoV-19/Philippines/PH-PGC-04790/2021	betacoronavirus	EPI_ISL_1213533	2021-02-01	Philippines	Central Visayas	29809	Human	50	Female
FMV		P.3	GR	hCoV-19/Philippines/PH-PGC-03940/2021	betacoronavirus	EPI_ISL_1213568	2021-01-26	Philippines	National Capital Region	29799	Human	47	Male
FMV		P.3	GR	hCoV-19/Philippines/PH-PGC-05004/2021	betacoronavirus	EPI_ISL_1213571	2021-01-17	Philippines	Central Visayas	29850	Human	5	Male
FMV		P.3	GR	hCoV-19/Philippines/PH-PGC-05029/2021	betacoronavirus	EPI_ISL_1213573	2021-01-08	Philippines	Central Visayas	29855	Human	7	Male
FMV		P.3	GR	hCoV-19/Philippines/PH-PGC-04909/2021	betacoronavirus	EPI_ISL_1213583	2021-02-03	Philippines	Western Visayas	29883	Human	53	Male
FMV		P.3	GR	hCoV-19/Philippines/PH-PGC-04739/2021	betacoronavirus	EPI_ISL_1219701	2021-02-03	Philippines	National Capital Region	29847	Human	23	Female
FMV		P.3	GR	hCoV-19/Philippines/PH-PGC-04812/2021	betacoronavirus	EPI_ISL_2091458	2021-02-02	Philippines	Central Visayas	29807	Human	37	Female
FMV		P.3	GR	hCoV-19/Philippines/PH-PGC-04766/2021	betacoronavirus	EPI_ISL_2105320	2021-01-31	Philippines	Central Visayas	29812	Human	15	Male
FMV		P.3	GR	hCoV-19/Philippines/PH-PGC-04765/2021	betacoronavirus	EPI_ISL_2105327	2021-01-31	Philippines	Central Visayas	29810	Human	17	Female
FMV		P.3	GR	hCoV-19/Philippines/PH-PGC-04821/2021	betacoronavirus	EPI_ISL_2105379	2021-02-01	Philippines	Central Visayas	29809	Human	44	Male
FMV		P.3	G	hCoV-19/Philippines/PH-PGC-04764/2021	betacoronavirus	EPI_ISL_2155587	2021-01-31	Philippines	Central Visayas	29812	Human	2	Male
FMV		P.3	G	hCoV-19/Philippines/PH-PGC-04809/2021	betacoronavirus	EPI_ISL_2155590	2021-02-02	Philippines	Central Visayas	29856	Human	52	Male
FMV		P.3	GR	hCoV-19/Philippines/PH-PGC-02824/2021	betacoronavirus	EPI_ISL_2156599	2021-01-20	Philippines	Cordillera Administrative Region	29820	Human	38	Female
FMV		P.3	GR	hCoV-19/Philippines/PH-RITM-208/2021	betacoronavirus	EPI_ISL_4459359	2021-01-21	Philippines	National Capital Region	29849	Human	25	Male
FMV		R.1	GR	hCoV-19/USA/TX-HMH-MCoV-20045/2021	betacoronavirus	EPI_ISL_1074484	2021-01-03	USA	Texas	29859	Human	unknown	unknown
FMV		R.1	GR	hCoV-19/USA/TX-HMH-MCoV-20978/2021	betacoronavirus	EPI_ISL_1075422	2021-01-05	USA	Texas	29834	Human	unknown	unknown
FMV		R.1	GR	hCoV-19/Japan/PG-20054/2021	betacoronavirus	EPI_ISL_1123468	2021-01-01	Japan	Shizuoka	29781	Human	unknown	unknown
FMV		R.1	GR	hCoV-19/Japan/PG-20167/2021	betacoronavirus	EPI_ISL_1123472	2021-01-01	Japan	Niigata	29781	Human	unknown	unknown
FMV		R.1	GR	hCoV-19/Japan/PG-20174/2021	betacoronavirus	EPI_ISL_1123473	2021-01-04	Japan	Niigata	29781	Human	unknown	unknown
FMV		R.1	GR	hCoV-19/Japan/PG-18354/2021	betacoronavirus	EPI_ISL_1127158	2021-01-04	Japan		29781	Human	unknown	unknown
FMV		R.1	GR	hCoV-19/Japan/PG-18369/2021	betacoronavirus	EPI_ISL_1127159	2021-01-04	Japan		29781	Human	unknown	unknown
FMV		R.1	GR	hCoV-19/Japan/PG-18380/2021	betacoronavirus	EPI_ISL_1127160	2021-01-06	Japan		29781	Human	unknown	unknown
FMV		R.1	GR	hCoV-19/Japan/PG-18381/2021	betacoronavirus	EPI_ISL_1127161	2021-01-06	Japan		29781	Human	unknown	unknown
FMV		R.1	GR	hCoV-19/Japan/PG-19276/2021	betacoronavirus	EPI_ISL_1127164	2021-01-02	Japan	Chiba	29781	Human	unknown	unknown
FMV		R.1	GR	hCoV-19/Japan/PG-19280/2021	betacoronavirus	EPI_ISL_1127165	2021-01-03	Japan	Chiba	29781	Human	unknown	unknown
FMV		R.1	GR	hCoV-19/Japan/PG-19282/2021	betacoronavirus	EPI_ISL_1127166	2021-01-04	Japan	Chiba	29781	Human	unknown	unknown
FMV		R.1	GR	hCoV-19/Japan/PG-19283/2021	betacoronavirus	EPI_ISL_1127167	2021-01-05	Japan	Chiba	29781	Human	unknown	unknown
FMV		R.1	GR	hCoV-19/Japan/PG-19284/2021	betacoronavirus	EPI_ISL_1127168	2021-01-05	Japan	Chiba	29781	Human	unknown	unknown
FMV		R.1	GR	hCoV-19/Japan/PG-19288/2021	betacoronavirus	EPI_ISL_1127169	2021-01-06	Japan	Chiba	29781	Human	unknown	unknown
FMV		R.1	GR	hCoV-19/Japan/PG-19289/2021	betacoronavirus	EPI_ISL_1127170	2021-01-06	Japan	Chiba	29781	Human	unknown	unknown
FMV		R.1	GR	hCoV-19/Japan/PG-19290/2021	betacoronavirus	EPI_ISL_1127171	2021-01-06	Japan	Chiba	29781	Human	unknown	unknown
FMV		R.1	GR	hCoV-19/Japan/PG-19291/2021	betacoronavirus	EPI_ISL_1127172	2021-01-06	Japan	Chiba	29781	Human	unknown	unknown
FMV		R.1	GR	hCoV-19/Japan/PG-19292/2021	betacoronavirus	EPI_ISL_1127173	2021-01-06	Japan	Chiba	29781	Human	unknown	unknown
FMV		R.1	GR	hCoV-19/Japan/PG-19349/2021	betacoronavirus	EPI_ISL_1127184	2021-01-05	Japan	Tochigi	29781	Human	unknown	unknown
FMV		R.1	GR	hCoV-19/Japan/PG-25707/2021	betacoronavirus	EPI_ISL_1427700	2021-01-04	Japan	Saitama	29781	Human	unknown	unknown
FMV		R.1	GR	hCoV-19/Japan/PG-27276/2021	betacoronavirus	EPI_ISL_1430818	2021-01-03	Japan	Kanagawa	29780	Human	unknown	unknown
FMV		R.1	GR	hCoV-19/Japan/PG-27277/2021	betacoronavirus	EPI_ISL_1430819	2021-01-03	Japan	Kanagawa	29780	Human	unknown	unknown
FMV		R.1	GR	hCoV-19/Japan/PG-28222/2021	betacoronavirus	EPI_ISL_1431731	2021-01-06	Japan	Okinawa	29780	Human	unknown	unknown
FMV		R.1	GR	hCoV-19/Japan/PG-28256/2021	betacoronavirus	EPI_ISL_1431765	2021-01-02	Japan	Saitama	29780	Human	unknown	unknown
FMV		R.1	GR	hCoV-19/Japan/PG-28257/2021	betacoronavirus	EPI_ISL_1431766	2021-01-02	Japan	Saitama	29780	Human	unknown	unknown
FMV		R.1	GR	hCoV-19/Japan/PG-28269/2021	betacoronavirus	EPI_ISL_1431778	2021-01-06	Japan	Nagano	29780	Human	unknown	unknown
FMV		R.1	GR	hCoV-19/Japan/PG-28304/2021	betacoronavirus	EPI_ISL_1431808	2021-01-04	Japan	Saitama	29780	Human	unknown	unknown
FMV		R.1	GR	hCoV-19/Japan/PG-28358/2021	betacoronavirus	EPI_ISL_1431838	2021-01-04	Japan	Tokyo	29780	Human	unknown	unknown
FMV		R.1	GR	hCoV-19/India/TN-10_S22_R1_001/2021	betacoronavirus	EPI_ISL_1708456	2021-01-01	India	Tamil Nadu	29819	Human	unknown	unknown
FMV		R.1	GR	hCoV-19/Japan/TMDU_No033/2021	betacoronavirus	EPI_ISL_1761335	2021-01-05	Japan	Tokyo	29774	Human	9	Male
FMV		R.1	GR	hCoV-19/Japan/PG-29196/2021	betacoronavirus	EPI_ISL_1927488	2021-01-02	Japan	Okinawa	29780	Human	unknown	unknown
FMV		R.1	GR	hCoV-19/Japan/PG-29197/2021	betacoronavirus	EPI_ISL_1927490	2021-01-02	Japan	Okinawa	29780	Human	unknown	unknown
FMV		R.1	GR	hCoV-19/Japan/PG-29198/2021	betacoronavirus	EPI_ISL_1927491	2021-01-02	Japan	Okinawa	29780	Human	unknown	unknown
FMV		R.1	GR	hCoV-19/Japan/PG-29199/2021	betacoronavirus	EPI_ISL_1927492	2021-01-02	Japan	Okinawa	29780	Human	unknown	unknown
FMV		R.1	GR	hCoV-19/Japan/PG-29200/2021	betacoronavirus	EPI_ISL_1927494	2021-01-02	Japan	Okinawa	29780	Human	unknown	unknown
FMV		R.1	GR	hCoV-19/Japan/PG-29201/2021	betacoronavirus	EPI_ISL_1927496	2021-01-06	Japan	Okinawa	29780	Human	unknown	unknown
FMV		R.1	GR	hCoV-19/USA/IA-GMF-46406/2021	betacoronavirus	EPI_ISL_806807	2021-01-03	USA	Iowa	29834	Human	unknown	unknown
FMV		R.1	GR	hCoV-19/USA/IA-GMF-47250/2021	betacoronavirus	EPI_ISL_806808	2021-01-05	USA	Iowa	29829	Human	unknown	unknown
FMV		R.1	GR	hCoV-19/USA/PA-CDC-LC0004419/2021	betacoronavirus	EPI_ISL_886810	2021-01-04	USA	Pennsylvania	29713	Human	21	Female
