# Supplementary material for: Omicron: a chimera of two early SARS-CoV-2 lineages
Source: Signal Transduct Target Ther. 2022 Mar 17;7:90. doi: 10.1038/s41392-022-00949-5 (PMC8927754; doi:10.1038/s41392-022-00949-5)
Supplement: Supplementary file 3 — Table S2. Information of PANGO lineages of SARS-CoV-2 retrieval from NCBI [file 41392_2022_949_MOESM3_ESM.xlsx]

## Sheet: Extended Data 2, Tab. S2
Accession	Pangolin	Molecule_type	Length	Geo_Location	Country	Host	Isolation_Source	Collection_Date
MT291826	A	ssRNA(+)	29807	China: Wuhan	China	Homo sapiens	lung	2019-12-30
MN938384	A	ssRNA(+)	29838	China: Shenzhen	China	Homo sapiens	oronasopharynx	2020-01-10
MN975262	A	ssRNA(+)	29891	China	China	Homo sapiens	lung, oronasopharynx	2020-01-11
MZ468053	A.1	ssRNA(+)	29825	USA	USA	Homo sapiens		2020-01-19
MW811435	A.1	ssRNA(+)	29861	USA: Washington, Snohomish County	USA	Homo sapiens	oronasopharynx	2020-01-22
MZ824621	A.1	ssRNA(+)	29903	China	China	Homo sapiens	oronasopharynx	2020-02-02
MT890230	A.11	ssRNA(+)	29823	Ghana	Ghana	Homo sapiens	oronasopharynx	2020-05-24
MT872492	A.12	ssRNA(+)	29897	Sierra Leone	Sierra Leone	Homo sapiens	oronasopharynx	2020-04-10
MT872496	A.12	ssRNA(+)	29898	Sierra Leone	Sierra Leone	Homo sapiens	oronasopharynx	2020-04-10
MT872498	A.12	ssRNA(+)	29901	Sierra Leone: Freetown	Sierra Leone	Homo sapiens	oronasopharynx	2020-04-14
MW521759	A.19	ssRNA(+)	29782	USA: NY	USA	Homo sapiens		2020-08-23
MT233519	A.2	ssRNA(+)	29782	Spain: Valencia	Spain	Homo sapiens		2020-02-27
LR884127	A.2	ssRNA(+)	29751	Spain	Spain	Homo sapiens		2020-03-02
MT292574	A.2	ssRNA(+)	29782	Spain	Spain	Homo sapiens	oronasopharynx	2020-03-02
MT451033	A.2.2	ssRNA(+)	29812	Australia: Victoria	Australia	Homo sapiens		2020-03-20
MT451242	A.2.2	ssRNA(+)	29813	Australia: Victoria	Australia	Homo sapiens		2020-03-20
MT451131	A.2.2	ssRNA(+)	29789	Australia: Victoria	Australia	Homo sapiens		2020-03-21
OA966204	A.2.3	ssRNA(+)	29782	United Kingdom:Scotland	United Kingdom	Homo sapiens		2020-03-20
OA966212	A.2.3	ssRNA(+)	29782	United Kingdom:Scotland	United Kingdom	Homo sapiens		2020-03-21
OA966215	A.2.3	ssRNA(+)	29782	United Kingdom:Scotland	United Kingdom	Homo sapiens		2020-03-21
MZ779302	A.2.4	ssRNA(+)	29867	USA: MP	USA	Homo sapiens		2020-12-24
OK548508	A.2.5	ssRNA(+)	29601	USA: California,San Diego	USA	Homo sapiens	oronasopharynx	2020-07-07
OL913104	A.2.5	ssRNA(+)	29903	China	China	Rodentia	lung	2020-08-26
MW586586	A.2.5	ssRNA(+)	29740	USA: FL	USA	Homo sapiens		2021-01-16
MW931439	A.2.5.1	ssRNA(+)	29831	USA: California	USA	Homo sapiens	oronasopharynx	2021-03-29
MZ009545	A.2.5.1	ssRNA(+)	29836	USA: Massachusetts	USA	Homo sapiens	oronasopharynx	2021-03-31
MZ538878	A.2.5.1	ssRNA(+)	29782	USA: FL	USA	Homo sapiens		2021-04-06
MW689883	A.2.5.2	ssRNA(+)	29833	USA: FL	USA	Homo sapiens		2021-02-13
MW780563	A.2.5.2	ssRNA(+)	29732	USA: Arizona	USA	Homo sapiens	oronasopharynx	2021-02-26
MW810328	A.2.5.2	ssRNA(+)	29782	USA: FL	USA	Homo sapiens		2021-03-02
MZ036460	A.2.5.3	ssRNA(+)	29716	USA: Florida	USA	Homo sapiens	oronasopharynx	2021-04-07
MZ194286	A.2.5.3	ssRNA(+)	29831	USA: Minnesota	USA	Homo sapiens		2021-04-24
MZ237178	A.2.5.3	ssRNA(+)	29825	USA: New York	USA	Homo sapiens	oronasopharynx	2021-04-30
OL448870	A.21	ssRNA(+)	29903	Mali	Mali	Homo sapiens		2020-06-10
OL698796	A.21	ssRNA(+)	29879	USA	USA	Homo sapiens	oronasopharynx	2021-01-06
MW571124	A.21	ssRNA(+)	29783	Ghana	Ghana	Homo sapiens		2021-01-07
OL701748	A.23	ssRNA(+)	29831	USA: TN	USA	Homo sapiens		2020-12-19
OL454628	A.23	ssRNA(+)	29777	Kenya	Kenya	Homo sapiens		2020-10-28
OK449157	A.23	ssRNA(+)	29782	Kenya	Kenya	Homo sapiens		2020-11-23
MZ287347	A.23.1	ssRNA(+)	29824	Uganda	Uganda	Homo sapiens	oronasopharynx	2020-11-04
MZ287364	A.23.1	ssRNA(+)	29818	Uganda	Uganda	Homo sapiens	oronasopharynx	2020-11-13
MZ287368	A.23.1	ssRNA(+)	29855	Uganda	Uganda	Homo sapiens	oronasopharynx	2020-11-14
MW853560	A.24	ssRNA(+)	29806	Uzbekistan: Tashkent	Uzbekistan	Homo sapiens	oronasopharynx	2020-10-14
OK449077	A.25	ssRNA(+)	29782	Kenya	Kenya	Homo sapiens		2020-06-08
MT972166	A.25	ssRNA(+)	29850	Australia: Victoria	Australia	Homo sapiens		2020-06-22
OA973477	A.25	ssRNA(+)	29902	United Kingdom:England	United Kingdom	Homo sapiens		2020-08-31
OA971809	A.26	ssRNA(+)	29782	United Kingdom:England	United Kingdom	Homo sapiens		2020-03-31
OA971824	A.26	ssRNA(+)	29782	United Kingdom:England	United Kingdom	Homo sapiens		2020-04-02
OA971911	A.26	ssRNA(+)	29782	United Kingdom:England	United Kingdom	Homo sapiens		2020-04-06
OU394407	A.27	ssRNA(+)	29903	United Kingdom:England	United Kingdom	Homo sapiens		2021-01-29
OD983071	A.27	ssRNA(+)	29888	United Kingdom:England	United Kingdom	Homo sapiens		2021-02-10
MW467456	A.28	ssRNA(+)	29903	Egypt	Egypt	Homo sapiens	oronasopharynx	2020-07-28
MW547503	A.28	ssRNA(+)	29793	Egypt	Egypt	Homo sapiens	oronasopharynx	2020-12-25
MW504609	A.28	ssRNA(+)	29787	Egypt	Egypt	Homo sapiens	oronasopharynx	2020-12-25
MW938154	A.29	ssRNA(+)	29857	USA: IA	USA	Homo sapiens		2021-03-01
OU423624	A.29	ssRNA(+)	29893	United Kingdom:England	United Kingdom	Homo sapiens		2021-05-09
OU389851	A.29	ssRNA(+)	29893	United Kingdom:England	United Kingdom	Homo sapiens		2021-05-16
MW279438	A.3	ssRNA(+)	29882	USA	USA	Homo sapiens	oronasopharynx	2020-03-11
MT509475	A.3	ssRNA(+)	29782	USA: Maryland	USA	Homo sapiens	oronasopharynx	2020-03-11
MW191288	A.3	ssRNA(+)	29773	USA: UT	USA	Homo sapiens		2020-03-12
MW191285	A.4	ssRNA(+)	29782	USA: UT	USA	Homo sapiens		2020-03-13
MT706143	A.4	ssRNA(+)	29782	USA: Wisconsin	USA	Homo sapiens	oronasopharynx	2020-03-13
MT706190	A.4	ssRNA(+)	29782	USA: Wisconsin, Dane County	USA	Homo sapiens	oronasopharynx	2020-03-19
LR884163	A.5	ssRNA(+)	29751	Spain	Spain	Homo sapiens		2020-02-27
LR884020	A.5	ssRNA(+)	29751	Spain	Spain	Homo sapiens		2020-03-01
LR884176	A.5	ssRNA(+)	29751	Spain	Spain	Homo sapiens		2020-03-03
MT447166	A.6	ssRNA(+)	29820	Thailand	Thailand	Homo sapiens		2020-01-23
MT447158	A.6	ssRNA(+)	29827	Thailand	Thailand	Homo sapiens		2020-01-25
MT447163	A.6	ssRNA(+)	29833	Thailand	Thailand	Homo sapiens		2020-02-22
MW828339	A.7	ssRNA(+)	29839	India	India	Homo sapiens	oronasopharynx	2020-05-09
MW828343	A.7	ssRNA(+)	29866	India	India	Homo sapiens	oronasopharynx	2020-05-12
MW828330	A.7	ssRNA(+)	29807	India	India	Homo sapiens	oronasopharynx	2020-05-13
OC997728	AA.1	ssRNA(+)	29903	United Kingdom:England	United Kingdom	Homo sapiens		2020-11-09
OD909111	AA.2	ssRNA(+)	29903	United Kingdom:Wales	United Kingdom	Homo sapiens		2020-12-08
OD936539	AA.2	ssRNA(+)	29880	United Kingdom:Wales	United Kingdom	Homo sapiens		2020-12-18
OD935746	AA.2	ssRNA(+)	29906	United Kingdom:Wales	United Kingdom	Homo sapiens		2020-12-30
OD905767	AA.3	ssRNA(+)	29903	United Kingdom:Wales	United Kingdom	Homo sapiens		2020-11-01
OD905487	AA.3	ssRNA(+)	29903	United Kingdom:Wales	United Kingdom	Homo sapiens		2020-11-20
OD905511	AA.3	ssRNA(+)	29903	United Kingdom:Wales	United Kingdom	Homo sapiens		2020-11-20
OB990384	AA.4	ssRNA(+)	29903	United Kingdom:Wales	United Kingdom	Homo sapiens		2020-10-22
OB989731	AA.4	ssRNA(+)	29903	United Kingdom:Wales	United Kingdom	Homo sapiens		2020-10-26
OB995726	AA.4	ssRNA(+)	29903	United Kingdom:Wales	United Kingdom	Homo sapiens		2020-11-02
OD936320	AA.5	ssRNA(+)	29903	United Kingdom:Wales	United Kingdom	Homo sapiens		2020-12-19
OD928842	AA.5	ssRNA(+)	29903	United Kingdom:England	United Kingdom	Homo sapiens		2020-12-31
OD979489	AA.5	ssRNA(+)	29903	United Kingdom:Wales	United Kingdom	Homo sapiens		2021-01-16
OB990383	AA.6	ssRNA(+)	29903	United Kingdom:Wales	United Kingdom	Homo sapiens		2020-10-22
OD905789	AA.6	ssRNA(+)	29903	United Kingdom:Wales	United Kingdom	Homo sapiens		2020-11-01
OD976191	AA.6	ssRNA(+)	29903	United Kingdom:Wales	United Kingdom	Homo sapiens		2020-11-22
OD905898	AA.7	ssRNA(+)	29903	United Kingdom:Wales	United Kingdom	Homo sapiens		2020-11-20
OD936272	AA.7	ssRNA(+)	29903	United Kingdom:Wales	United Kingdom	Homo sapiens		2020-12-19
OD936014	AA.7	ssRNA(+)	29903	United Kingdom:Wales	United Kingdom	Homo sapiens		2020-12-24
OD936235	AA.8	ssRNA(+)	29903	United Kingdom:Wales	United Kingdom	Homo sapiens		2020-12-19
OD936244	AA.8	ssRNA(+)	29903	United Kingdom:Wales	United Kingdom	Homo sapiens		2020-12-19
OD936330	AA.8	ssRNA(+)	29903	United Kingdom:Wales	United Kingdom	Homo sapiens		2020-12-19
OB986902	AC.1	ssRNA(+)	29903	United Kingdom:England	United Kingdom	Homo sapiens		2020-10-21
OB986903	AC.1	ssRNA(+)	29903	United Kingdom:England	United Kingdom	Homo sapiens		2020-10-21
OB986908	AC.1	ssRNA(+)	29903	United Kingdom:England	United Kingdom	Homo sapiens		2020-10-21
OA970102	AD.2	ssRNA(+)	29903	United Kingdom:Scotland	United Kingdom	Homo sapiens		2020-07-28
OA969738	AD.2	ssRNA(+)	29903	United Kingdom:Scotland	United Kingdom	Homo sapiens		2020-07-31
OA969681	AD.2	ssRNA(+)	29903	United Kingdom:Scotland	United Kingdom	Homo sapiens		2020-08-01
OA978948	AE.1	ssRNA(+)	29903	United Kingdom:England	United Kingdom	Homo sapiens		2020-07-16
OA978887	AE.1	ssRNA(+)	29903	United Kingdom:England	United Kingdom	Homo sapiens		2020-07-18
OA974127	AE.1	ssRNA(+)	29903	United Kingdom:England	United Kingdom	Homo sapiens		2020-08-27
MT742782	AE.2	ssRNA(+)	29885	Bahrain	Bahrain	Homo sapiens	oronasopharynx	2020-06-23
MW227483	AE.2	ssRNA(+)	29778	Bahrain	Bahrain	Homo sapiens		2020-08-25
MW332552	AE.2	ssRNA(+)	29846	Bahrain	Bahrain	Homo sapiens		2020-09-10
MT742784	AE.4	ssRNA(+)	29766	Bahrain	Bahrain	Homo sapiens	oronasopharynx	2020-06-23
MW341478	AE.4	ssRNA(+)	29840	Bahrain	Bahrain	Homo sapiens		2020-10-11
MW341469	AE.4	ssRNA(+)	29841	Bahrain	Bahrain	Homo sapiens		2020-10-13
OA978639	AE.5	ssRNA(+)	29903	United Kingdom:England	United Kingdom	Homo sapiens		2020-07-20
MW341471	AE.6	ssRNA(+)	29864	Bahrain	Bahrain	Homo sapiens		2020-10-11
MW332533	AE.6	ssRNA(+)	29840	Bahrain	Bahrain	Homo sapiens		2020-10-13
MW228264	AE.6	ssRNA(+)	29782	Bahrain	Bahrain	Homo sapiens		2020-10-13
MW227484	AE.7	ssRNA(+)	29782	Bahrain	Bahrain	Homo sapiens		2020-07-09
MW227482	AE.7	ssRNA(+)	29777	Bahrain	Bahrain	Homo sapiens		2020-08-28
MW655538	AE.7	ssRNA(+)	29782	Bahrain	Bahrain	Homo sapiens		2020-09-04
OD899743	AH.3	ssRNA(+)	29903	United Kingdom:England	United Kingdom	Homo sapiens		2020-11-14
OD899750	AH.3	ssRNA(+)	29903	United Kingdom:England	United Kingdom	Homo sapiens		2020-11-14
OD901248	AH.3	ssRNA(+)	29903	United Kingdom:England	United Kingdom	Homo sapiens		2020-11-14
OA994770	AK.1	ssRNA(+)	29903	United Kingdom:England	United Kingdom	Homo sapiens		2020-09-03
OA982394	AK.1	ssRNA(+)	29903	United Kingdom:Wales	United Kingdom	Homo sapiens		2020-09-10
OA999363	AK.1	ssRNA(+)	29903	United Kingdom:England	United Kingdom	Homo sapiens		2020-09-19
OD927369	AM.1	ssRNA(+)	29903	United Kingdom:England	United Kingdom	Homo sapiens		2021-01-02
OU393227	AM.3	ssRNA(+)	29903	United Kingdom:England	United Kingdom	Homo sapiens		2020-12-01
OU394563	AM.3	ssRNA(+)	29903	United Kingdom:England	United Kingdom	Homo sapiens		2020-11-25
OA993138	AN.1	ssRNA(+)	29894	United Kingdom:England	United Kingdom	Homo sapiens		2020-09-25
OA990376	AP.1	ssRNA(+)	29903	United Kingdom:Wales	United Kingdom	Homo sapiens		2020-09-20
OA999396	AP.1	ssRNA(+)	29903	United Kingdom:Wales	United Kingdom	Homo sapiens		2020-09-20
OU813409	AP.1	ssRNA(+)	29894	United Kingdom:Wales	United Kingdom	Homo sapiens		2020-10-01
OB994676	AS.1	ssRNA(+)	29903	United Kingdom:England	United Kingdom	Homo sapiens		2020-11-03
OC997121	AS.1	ssRNA(+)	29903	United Kingdom:England	United Kingdom	Homo sapiens		2020-11-05
OB996542	AS.1	ssRNA(+)	29903	United Kingdom:England	United Kingdom	Homo sapiens		2020-11-08
OA991632	AS.2	ssRNA(+)	29903	United Kingdom:England	United Kingdom	Homo sapiens		2020-10-05
OA991596	AS.2	ssRNA(+)	29903	United Kingdom:England	United Kingdom	Homo sapiens		2020-10-06
OA995200	AS.2	ssRNA(+)	29903	United Kingdom:England	United Kingdom	Homo sapiens		2020-10-08
MW750605	AT.1	ssRNA(+)	29564	Russia	Russia	Homo sapiens		2021-01-22
MW750606	AT.1	ssRNA(+)	29803	Russia	Russia	Homo sapiens		2021-01-18
OU385599	AV.1	ssRNA(+)	29885	United Kingdom:England	United Kingdom	Homo sapiens		2021-04-28
OU423351	AV.1	ssRNA(+)	29885	United Kingdom:England	United Kingdom	Homo sapiens		2021-04-29
OU388823	AV.1	ssRNA(+)	29885	United Kingdom:England	United Kingdom	Homo sapiens		2021-04-29
OU347842	AY.1	ssRNA(+)	29897	United Kingdom:England	United Kingdom	Homo sapiens		2021-04-24
OU348275	AY.1	ssRNA(+)	29896	United Kingdom:England	United Kingdom	Homo sapiens		2021-05-04
OU858075	AY.1	ssRNA(+)	29896	Slovakia	Slovakia	Homo sapiens		2021-06-09
OU390325	AY.10	ssRNA(+)	29896	United Kingdom:England	United Kingdom	Homo sapiens		2021-04-22
OU423649	AY.10	ssRNA(+)	29896	United Kingdom:England	United Kingdom	Homo sapiens		2021-05-01
OU395723	AY.10	ssRNA(+)	29896	United Kingdom:England	United Kingdom	Homo sapiens		2021-05-10
OV103967	AY.100	ssRNA(+)	29850	Slovakia	Slovakia	Homo sapiens		2021-02-09
OV104221	AY.100	ssRNA(+)	29854	Slovakia	Slovakia	Homo sapiens		2021-02-09
OL543619	AY.100	ssRNA(+)	29865	USA	USA	Homo sapiens		2021-06-25
MZ558143	AY.101	ssRNA(+)	29837	India	India	Homo sapiens		2021-06-12
OU979564	AY.101	ssRNA(+)	29896	United Kingdom:England	United Kingdom	Homo sapiens		2021-10-12
OV115101	AY.101	ssRNA(+)	29890	Slovakia	Slovakia	Homo sapiens		2021-11-06
OU706450	AY.102	ssRNA(+)	29896	Slovakia	Slovakia	Homo sapiens		2021-04-01
OU814304	AY.102	ssRNA(+)	29890	United Kingdom:England	United Kingdom	Homo sapiens		2021-05-25
OU804472	AY.102	ssRNA(+)	29890	United Kingdom:England	United Kingdom	Homo sapiens		2021-05-27
OM040548	AY.103	ssRNA(+)	29772	USA	USA	Homo sapiens		2021-02-20
OL964453	AY.103	ssRNA(+)	29701	USA: Texas	USA	Homo sapiens	oronasopharynx	2021-03-30
OL707558	AY.103	ssRNA(+)	29702	USA: Arkansas	USA	Homo sapiens		2021-06-07
OL711168	AY.104	ssRNA(+)	29812	USA: New York	USA	Homo sapiens		2021-11-11
OL764816	AY.104	ssRNA(+)	29836	USA: NJ	USA	Homo sapiens		2021-11-12
OL743688	AY.104	ssRNA(+)	29836	USA: NJ	USA	Homo sapiens		2021-11-12
OL706764	AY.105	ssRNA(+)	29701	USA: Arkansas	USA	Homo sapiens		2021-06-12
OL707565	AY.105	ssRNA(+)	29702	USA: Arkansas	USA	Homo sapiens		2021-06-30
OL964474	AY.105	ssRNA(+)	29701	USA: Texas	USA	Homo sapiens	oronasopharynx	2021-08-02
OL779040	AY.106	ssRNA(+)	29725	Malawi	Malawi	Homo sapiens		2021-07-01
OK028609	AY.106	ssRNA(+)	29829	USA: Florida	USA	Homo sapiens		2021-07-31
OK104645	AY.106	ssRNA(+)	29903	Egypt	Egypt	Homo sapiens	oronasopharynx	2021-08-31
MZ998478	AY.107	ssRNA(+)	29786	USA: Colorado	USA	Homo sapiens	oronasopharynx	2021-08-06
OL700890	AY.107	ssRNA(+)	29769	USA	USA	Homo sapiens		2021-08-29
OL850282	AY.107	ssRNA(+)	29816	USA	USA	Homo sapiens		2021-09-07
OL522540	AY.108	ssRNA(+)	29861	USA: Florida	USA	Homo sapiens	oronasopharynx	2021-07-06
OK550214	AY.108	ssRNA(+)	29591	USA: California,San Diego	USA	Homo sapiens	oronasopharynx	2021-07-21
OU593904	AY.108	ssRNA(+)	29890	United Kingdom:England	United Kingdom	Homo sapiens		2021-07-21
OU798538	AY.109	ssRNA(+)	29884	United Kingdom:England	United Kingdom	Homo sapiens		2021-09-01
OU804370	AY.109	ssRNA(+)	29884	United Kingdom:England	United Kingdom	Homo sapiens		2021-09-01
OU858295	AY.109	ssRNA(+)	29896	United Kingdom:England	United Kingdom	Homo sapiens		2021-09-28
OU348525	AY.11	ssRNA(+)	29891	United Kingdom:England	United Kingdom	Homo sapiens		2021-05-08
OU348130	AY.11	ssRNA(+)	29890	United Kingdom:England	United Kingdom	Homo sapiens		2021-05-11
OU348263	AY.11	ssRNA(+)	29890	United Kingdom:England	United Kingdom	Homo sapiens		2021-05-16
MZ634176	AY.110	ssRNA(+)	29766	USA: Louisiana, Orleans	USA	Homo sapiens	oronasopharynx	2021-07-19
OL866250	AY.110	ssRNA(+)	29852	USA: Raleigh, NC	USA	Homo sapiens	oronasopharynx	2021-07-25
OL802193	AY.110	ssRNA(+)	29801	USA: Michigan	USA	Homo sapiens	swab	2021-08-03
OU394359	AY.111	ssRNA(+)	29890	United Kingdom:England	United Kingdom	Homo sapiens		2021-04-28
OU385380	AY.111	ssRNA(+)	29890	United Kingdom:England	United Kingdom	Homo sapiens		2021-04-29
OU392274	AY.111	ssRNA(+)	29890	United Kingdom:England	United Kingdom	Homo sapiens		2021-04-29
MZ798359	AY.113	ssRNA(+)	29765	USA: Louisiana, Vermilion	USA	Homo sapiens	oronasopharynx	2021-07-23
OL754448	AY.113	ssRNA(+)	29701	USA: Texas	USA	Homo sapiens	oronasopharynx	2021-07-29
OL706779	AY.113	ssRNA(+)	29702	USA: Arkansas	USA	Homo sapiens		2021-08-01
OL966460	AY.114	ssRNA(+)	29812	Bangladesh	Bangladesh	Homo sapiens	oronasopharynx	2021-07-13
MZ712932	AY.114	ssRNA(+)	29756	USA: Louisiana, Livingston	USA	Homo sapiens	oronasopharynx	2021-07-20
MZ798315	AY.114	ssRNA(+)	29765	USA: Louisiana, Orleans	USA	Homo sapiens	oronasopharynx	2021-08-01
OL779139	AY.116	ssRNA(+)	29725	Malawi	Malawi	Homo sapiens		2021-07-02
OL351408	AY.116	ssRNA(+)	29903	Egypt	Egypt	Homo sapiens	oronasopharynx	2021-10-19
OL351393	AY.116	ssRNA(+)	29903	Egypt	Egypt	Homo sapiens	oronasopharynx	2021-10-21
OL847760	AY.116.1	ssRNA(+)	29861	USA	USA	Homo sapiens		2021-07-06
OL847855	AY.116.1	ssRNA(+)	29873	USA	USA	Homo sapiens		2021-07-08
OL977303	AY.116.1	ssRNA(+)	29769	USA: California, Los Angeles County	USA	Homo sapiens		2021-07-29
OU348241	AY.117	ssRNA(+)	29890	United Kingdom:England	United Kingdom	Homo sapiens		2021-06-04
OL754434	AY.117	ssRNA(+)	29701	USA: Texas	USA	Homo sapiens	oronasopharynx	2021-07-27
OL964493	AY.117	ssRNA(+)	29701	USA: Texas	USA	Homo sapiens	oronasopharynx	2021-07-28
OV103623	AY.118	ssRNA(+)	29854	Slovakia	Slovakia	Homo sapiens		2021-02-09
OV104272	AY.118	ssRNA(+)	29860	Slovakia	Slovakia	Homo sapiens		2021-02-09
OL847802	AY.118	ssRNA(+)	29872	USA	USA	Homo sapiens		2021-07-08
OK246768	AY.119	ssRNA(+)	29896	USA: Pennsylvania	USA	Homo sapiens		2021-05-19
OL847786	AY.119	ssRNA(+)	29862	USA	USA	Homo sapiens		2021-07-08
OL847939	AY.119	ssRNA(+)	29862	USA	USA	Homo sapiens		2021-07-08
OL729897	AY.119.1	ssRNA(+)	29823	USA: California	USA	Homo sapiens		2021-11-04
OL952157	AY.119.1	ssRNA(+)	29816	USA: Texas	USA	Homo sapiens		2021-11-09
OL775954	AY.119.1	ssRNA(+)	29803	USA: New Mexico	USA	Homo sapiens		2021-11-10
OU348286	AY.120	ssRNA(+)	29891	United Kingdom:England	United Kingdom	Homo sapiens		2021-05-08
OU347809	AY.120	ssRNA(+)	29891	United Kingdom:England	United Kingdom	Homo sapiens		2021-05-09
OU348220	AY.120	ssRNA(+)	29896	United Kingdom:England	United Kingdom	Homo sapiens		2021-05-09
OL984113	AY.120.1	ssRNA(+)	29808	USA: Canyon, ID	USA	Homo sapiens		2021-06-05
OL984117	AY.120.1	ssRNA(+)	29806	USA: Canyon, ID	USA	Homo sapiens		2021-06-21
OM003761	AY.120.1	ssRNA(+)	29832	USA: Washington,Whitman County	USA	Homo sapiens		2021-07-29
OU806114	AY.120.2	ssRNA(+)	29896	United Kingdom:England	United Kingdom	Homo sapiens		2021-06-01
OU806439	AY.120.2	ssRNA(+)	29896	United Kingdom:England	United Kingdom	Homo sapiens		2021-06-03
OU421950	AY.120.2	ssRNA(+)	29897	United Kingdom:England	United Kingdom	Homo sapiens		2021-07-01
OV085568	AY.120.2.1	ssRNA(+)	29878	United Kingdom:England	United Kingdom	Homo sapiens
OU733161	AY.120.2.1	ssRNA(+)	29896	United Kingdom:England	United Kingdom	Homo sapiens		2021-07-31
OU395010	AY.121	ssRNA(+)	29888	United Kingdom:England	United Kingdom	Homo sapiens		2021-06-07
OU420128	AY.121	ssRNA(+)	29888	United Kingdom:England	United Kingdom	Homo sapiens		2021-06-08
OU488887	AY.121	ssRNA(+)	29890	United Kingdom:England	United Kingdom	Homo sapiens		2021-07-04
OV195467	AY.121.1	ssRNA(+)	29890	United Kingdom:England	United Kingdom	Homo sapiens		2021-11-11
OL887057	AY.121.1	ssRNA(+)	29811	USA: Massachusetts	USA	Homo sapiens		2021-11-17
OL714086	AY.121.1	ssRNA(+)	29871	USA: Massachusetts	USA	Homo sapiens		2021-11-18
OV103680	AY.122	ssRNA(+)	29886	Slovakia	Slovakia	Homo sapiens		2021-01-09
OV103802	AY.122	ssRNA(+)	29853	Slovakia	Slovakia	Homo sapiens		2021-01-09
OV104214	AY.122	ssRNA(+)	29844	Slovakia	Slovakia	Homo sapiens		2021-01-09
OM001144	AY.122.1	ssRNA(+)	29836	USA: NY	USA	Homo sapiens	oronasopharynx	2021-09-12
OL730910	AY.122.1	ssRNA(+)	29823	USA: Illinois	USA	Homo sapiens		2021-11-05
OL765214	AY.122.1	ssRNA(+)	29836	USA: NJ	USA	Homo sapiens		2021-11-09
OV006332	AY.123	ssRNA(+)	29890	United Kingdom:England	United Kingdom	Homo sapiens		2021-10-10
OV026268	AY.123	ssRNA(+)	29892	United Kingdom:England	United Kingdom	Homo sapiens		2021-11-03
OL948165	AY.123	ssRNA(+)	29823	USA: New Jersey	USA	Homo sapiens		2021-11-05
OV104015	AY.124	ssRNA(+)	29888	Slovakia	Slovakia	Homo sapiens		2021-01-09
OV104007	AY.124	ssRNA(+)	29883	Slovakia	Slovakia	Homo sapiens		2021-02-09
OV104452	AY.124	ssRNA(+)	29823	Slovakia	Slovakia	Homo sapiens		2021-02-09
OU706371	AY.125	ssRNA(+)	29896	Slovakia	Slovakia	Homo sapiens		2021-07-08
OU857488	AY.125	ssRNA(+)	29880	Slovakia	Slovakia	Homo sapiens		2021-07-09
OU706518	AY.125	ssRNA(+)	29896	Slovakia	Slovakia	Homo sapiens		2021-07-09
OV103676	AY.126	ssRNA(+)	29868	Slovakia	Slovakia	Homo sapiens		2021-01-09
OV103966	AY.126	ssRNA(+)	29859	Slovakia	Slovakia	Homo sapiens		2021-01-09
OV104100	AY.126	ssRNA(+)	29848	Slovakia	Slovakia	Homo sapiens		2021-01-09
MZ702716	AY.127	ssRNA(+)	29789	India	India	Homo sapiens	oronasopharynx	2021-04-15
OU418624	AY.127	ssRNA(+)	29890	United Kingdom:England	United Kingdom	Homo sapiens		2021-05-11
OU389889	AY.127	ssRNA(+)	29890	United Kingdom:England	United Kingdom	Homo sapiens		2021-05-15
OU803825	AY.13	ssRNA(+)	29887	United Kingdom:England	United Kingdom	Homo sapiens		2021-05-30
MZ505746	AY.13	ssRNA(+)	29860	USA: Louisiana, Orleans	USA	Homo sapiens	oronasopharynx	2021-06-21
MZ716836	AY.13	ssRNA(+)	29773	USA: Florida	USA	Homo sapiens	oronasopharynx	2021-06-28
OL706796	AY.14	ssRNA(+)	29702	USA: Arkansas	USA	Homo sapiens		2021-06-22
OL847738	AY.14	ssRNA(+)	29862	USA	USA	Homo sapiens		2021-07-06
OL847750	AY.14	ssRNA(+)	29870	USA	USA	Homo sapiens		2021-07-06
OL913853	AY.16	ssRNA(+)	29815	Bangladesh	Bangladesh	Homo sapiens	oronasopharynx	2021-07-09
OL966470	AY.16	ssRNA(+)	29800	Bangladesh	Bangladesh	Homo sapiens	oronasopharynx	2021-07-13
OV104437	AY.16	ssRNA(+)	29875	Slovakia	Slovakia	Homo sapiens		2021-08-29
OU807484	AY.16.1	ssRNA(+)	29896	United Kingdom:England	United Kingdom	Homo sapiens		2021-05-23
MZ769220	AY.16.1	ssRNA(+)	29820	Bahrain	Bahrain	Homo sapiens		2021-07-27
MZ769253	AY.16.1	ssRNA(+)	29820	Bahrain	Bahrain	Homo sapiens		2021-08-01
OU491030	AY.17	ssRNA(+)	29890	United Kingdom:England	United Kingdom	Homo sapiens		2021-07-18
OU534367	AY.19	ssRNA(+)	29896	United Kingdom:England	United Kingdom	Homo sapiens		2021-07-25
OU534560	AY.19	ssRNA(+)	29896	United Kingdom:England	United Kingdom	Homo sapiens		2021-07-20
MZ436591	AY.2	ssRNA(+)	29844	USA: Louisiana	USA	Homo sapiens	oronasopharynx	2021-06-01
OK512340	AY.2	ssRNA(+)	29710	USA: Arizona	USA	Homo sapiens	oronasopharynx	2021-06-09
OK232944	AY.2	ssRNA(+)	29710	USA: Arizona	USA	Homo sapiens	oronasopharynx	2021-06-09
OU798285	AY.20	ssRNA(+)	29896	United Kingdom:England	United Kingdom	Homo sapiens		2021-05-22
OU792323	AY.20	ssRNA(+)	29890	United Kingdom:England	United Kingdom	Homo sapiens		2021-05-29
OL847744	AY.20	ssRNA(+)	29862	USA	USA	Homo sapiens		2021-07-06
OV107417	AY.20.1	ssRNA(+)	29890	Slovakia	Slovakia	Homo sapiens		2021-10-18
OV109538	AY.20.1	ssRNA(+)	29890	Slovakia	Slovakia	Homo sapiens		2021-11-06
OV250949	AY.20.1	ssRNA(+)	29890	Slovakia	Slovakia	Homo sapiens		2021-11-11
OL935717	AY.21	ssRNA(+)	29823	USA: Minnesota	USA	Homo sapiens	oronasopharynx	2021-12-02
OM017117	AY.22	ssRNA(+)	29823	Portugal: Coimbra	Portugal	Homo sapiens	oronasopharynx	2021-12-08
OL996199	AY.22	ssRNA(+)	29813	USA: North Carolina	USA	Homo sapiens		2021-12-08
OK668280	AY.23	ssRNA(+)	29818	Myanmar	Myanmar	Homo sapiens	oronasopharynx	2021-06-07
BS001323	AY.23	ssRNA(+)	29828	Japan:Shizuoka, center	Japan	Homo sapiens	saliva, oronasopharynx	2021-07-05
BS001324	AY.23	ssRNA(+)	29817	Japan:Shizuoka, east	Japan	Homo sapiens	saliva, oronasopharynx	2021-07-06
OL948899	AY.23.1	ssRNA(+)	29816	USA: Illinois	USA	Homo sapiens		2021-11-06
OV104394	AY.23.2	ssRNA(+)	29888	Slovakia	Slovakia	Homo sapiens		2021-01-09
OV104448	AY.23.2	ssRNA(+)	29890	Slovakia	Slovakia	Homo sapiens		2021-01-09
OV104460	AY.23.2	ssRNA(+)	29874	Slovakia	Slovakia	Homo sapiens		2021-08-29
OL910970	AY.24	ssRNA(+)	29815	Bangladesh	Bangladesh	Homo sapiens	oronasopharynx	2021-06-29
OU795509	AY.24	ssRNA(+)	29890	United Kingdom:England	United Kingdom	Homo sapiens		2021-07-17
OL866691	AY.24	ssRNA(+)	29831	USA: Colfax, NC	USA	Homo sapiens	oronasopharynx	2021-08-17
OL977652	AY.25	ssRNA(+)	29769	USA: California, Los Angeles County	USA	Homo sapiens		2021-01-06
OL804345	AY.25	ssRNA(+)	29702	USA: New Mexico	USA	Homo sapiens		2021-05-17
MZ558104	AY.25	ssRNA(+)	29837	India	India	Homo sapiens		2021-05-18
OL795611	AY.25.1	ssRNA(+)	29767	USA	USA	Homo sapiens	oronasopharynx	2021-09-05
OL702619	AY.25.1	ssRNA(+)	29769	USA	USA	Homo sapiens		2021-10-14
OL734494	AY.25.1	ssRNA(+)	29770	USA: Arizona	USA	Homo sapiens	oronasopharynx	2021-11-07
OV104547	AY.26	ssRNA(+)	29873	Slovakia	Slovakia	Homo sapiens		2021-01-09
OV104551	AY.26	ssRNA(+)	29870	Slovakia	Slovakia	Homo sapiens		2021-01-09
OK246827	AY.26	ssRNA(+)	29896	USA: Pennsylvania	USA	Homo sapiens		2021-04-21
OL941038	AY.27	ssRNA(+)	29793	USA: Oklahoma, Tulsa	USA	Homo sapiens		2021-09-25
OL740818	AY.27	ssRNA(+)	29802	USA: Washington,Whitman County	USA	Homo sapiens		2021-10-07
OL714940	AY.27	ssRNA(+)	29787	USA: Colorado	USA	Homo sapiens	oronasopharynx	2021-11-05
OK570746	AY.28	ssRNA(+)	29813	USA: FL	USA	Homo sapiens		2021-07-24
OK385873	AY.28	ssRNA(+)	29842	USA	USA	Homo sapiens		2021-08-02
BS001325	AY.29	ssRNA(+)	29807	Japan:Shizuoka, east	Japan	Homo sapiens	oronasopharynx	2021-07-02
BS001327	AY.29	ssRNA(+)	29816	Japan:Shizuoka, east	Japan	Homo sapiens	saliva, oronasopharynx	2021-07-05
BS001363	AY.29	ssRNA(+)	29818	Japan:Shizuoka, center	Japan	Homo sapiens	saliva, oronasopharynx	2021-07-05
MZ491704	AY.3	ssRNA(+)	29779	USA: Texas	USA	Homo sapiens	oronasopharynx	2021-06-09
OL842190	AY.3	ssRNA(+)	29817	USA	USA	Homo sapiens		2021-06-29
MZ690414	AY.3	ssRNA(+)	29775	USA: South Carolina	USA	Homo sapiens	oronasopharynx	2021-07-05
MZ505747	AY.3.1	ssRNA(+)	29853	USA: Louisiana, Jefferson	USA	Homo sapiens	oronasopharynx	2021-06-18
MZ577497	AY.3.1	ssRNA(+)	29653	USA: Louisiana, Orleans	USA	Homo sapiens	oronasopharynx	2021-07-06
MZ577502	AY.3.1	ssRNA(+)	29649	USA: Louisiana, Jefferson	USA	Homo sapiens	oronasopharynx	2021-07-07
OL721301	AY.30	ssRNA(+)	29812	USA: California	USA	Homo sapiens	oronasopharynx	2021-11-24
OL715836	AY.30	ssRNA(+)	29812	USA: California	USA	Homo sapiens	oronasopharynx	2021-11-27
OL785306	AY.30	ssRNA(+)	29845	USA: California	USA	Homo sapiens	oronasopharynx	2021-11-29
OU420842	AY.32	ssRNA(+)	29891	United Kingdom:England	United Kingdom	Homo sapiens		2021-07-01
OK104619	AY.32	ssRNA(+)	29903	Egypt	Egypt	Homo sapiens	oronasopharynx	2021-09-02
OK104620	AY.32	ssRNA(+)	29903	Egypt	Egypt	Homo sapiens	oronasopharynx	2021-09-02
OV104530	AY.33	ssRNA(+)	29852	Slovakia	Slovakia	Homo sapiens		2021-04-09
OU422833	AY.33	ssRNA(+)	29887	United Kingdom:England	United Kingdom	Homo sapiens		2021-05-21
OU706270	AY.33	ssRNA(+)	29896	Slovakia	Slovakia	Homo sapiens		2021-06-27
OU706615	AY.34	ssRNA(+)	29902	Slovakia	Slovakia	Homo sapiens		2021-07-23
OU819600	AY.34	ssRNA(+)	29899	Slovakia	Slovakia	Homo sapiens		2021-07-26
OU819934	AY.34	ssRNA(+)	29899	Slovakia	Slovakia	Homo sapiens		2021-07-26
OU594393	AY.34.1	ssRNA(+)	29893	United Kingdom:England	United Kingdom	Homo sapiens		2021-08-02
OU737833	AY.34.1	ssRNA(+)	29893	United Kingdom:England	United Kingdom	Homo sapiens		2021-08-26
OU802737	AY.34.1	ssRNA(+)	29893	United Kingdom:England	United Kingdom	Homo sapiens		2021-09-02
OL730589	AY.34.1.1	ssRNA(+)	29823	USA: Minnesota	USA	Homo sapiens		2021-11-04
OU801451	AY.34.2	ssRNA(+)	29899	United Kingdom:England	United Kingdom	Homo sapiens		2021-08-31
OU814922	AY.34.2	ssRNA(+)	29893	United Kingdom:England	United Kingdom	Homo sapiens		2021-09-14
OU858277	AY.34.2	ssRNA(+)	29893	United Kingdom:England	United Kingdom	Homo sapiens		2021-09-29
MZ236962	AY.35	ssRNA(+)	29819	USA: Florida	USA	Homo sapiens	oronasopharynx	2021-04-28
MZ278889	AY.35	ssRNA(+)	29823	USA: Florida	USA	Homo sapiens	oronasopharynx	2021-05-03
MZ290293	AY.35	ssRNA(+)	29821	USA: Florida	USA	Homo sapiens	oronasopharynx	2021-05-05
OU594421	AY.36	ssRNA(+)	29890	United Kingdom:England	United Kingdom	Homo sapiens		2021-07-21
OU737520	AY.36	ssRNA(+)	29887	United Kingdom:England	United Kingdom	Homo sapiens		2021-07-30
OL866410	AY.36	ssRNA(+)	29839	USA: Hillsborough, NC	USA	Homo sapiens	oronasopharynx	2021-08-07
OU819584	AY.37	ssRNA(+)	29896	Slovakia	Slovakia	Homo sapiens		2021-07-24
OV195736	AY.37	ssRNA(+)	29890	United Kingdom:England	United Kingdom	Homo sapiens		2021-07-28
OL799383	AY.37	ssRNA(+)	29792	USA: Michigan	USA	Homo sapiens	swab	2021-08-09
OM039735	AY.38	ssRNA(+)	29812	USA: California	USA	Homo sapiens	oronasopharynx	2021-12-18
OU390449	AY.39	ssRNA(+)	29896	United Kingdom:England	United Kingdom	Homo sapiens		2021-04-18
OU422516	AY.39	ssRNA(+)	29890	United Kingdom:England	United Kingdom	Homo sapiens		2021-05-02
OU417955	AY.39	ssRNA(+)	29890	United Kingdom:England	United Kingdom	Homo sapiens		2021-05-03
OL866168	AY.39.1	ssRNA(+)	29852	USA: Durham, NC	USA	Homo sapiens	oronasopharynx	2021-07-12
OL866190	AY.39.1	ssRNA(+)	29852	USA: Mebane, NC	USA	Homo sapiens	oronasopharynx	2021-07-16
OL866202	AY.39.1	ssRNA(+)	29831	USA: Durham, NC	USA	Homo sapiens	oronasopharynx	2021-07-18
OL795630	AY.39.1.1	ssRNA(+)	29703	USA	USA	Homo sapiens	oronasopharynx	2021-09-06
OL795696	AY.39.1.1	ssRNA(+)	29734	USA	USA	Homo sapiens	oronasopharynx	2021-09-07
OV108577	AY.39.1.1	ssRNA(+)	29887	Slovakia	Slovakia	Homo sapiens		2021-11-02
OL946844	AY.39.2	ssRNA(+)	29817	USA: California	USA	Homo sapiens		2021-11-04
OL923461	AY.39.2	ssRNA(+)	29816	USA: Connecticut	USA	Homo sapiens		2021-11-14
OL731553	AY.39.2	ssRNA(+)	29814	USA: New York	USA	Homo sapiens		2021-11-14
OU807204	AY.4	ssRNA(+)	29890	United Kingdom:England	United Kingdom	Homo sapiens		2020-10-27
OV103798	AY.4	ssRNA(+)	29861	Slovakia	Slovakia	Homo sapiens		2021-01-09
OV104388	AY.4	ssRNA(+)	29859	Slovakia	Slovakia	Homo sapiens		2021-01-09
OU423442	AY.4.1	ssRNA(+)	29890	United Kingdom:England	United Kingdom	Homo sapiens		2021-06-16
OU395327	AY.4.1	ssRNA(+)	29890	United Kingdom:England	United Kingdom	Homo sapiens		2021-06-27
OU800400	AY.4.1	ssRNA(+)	29890	United Kingdom:England	United Kingdom	Homo sapiens		2021-07-14
OU815347	AY.4.2	ssRNA(+)	29890	United Kingdom:England	United Kingdom	Homo sapiens		2021-05-13
OU395189	AY.4.2	ssRNA(+)	29890	United Kingdom:England	United Kingdom	Homo sapiens		2021-06-23
OU814705	AY.4.2	ssRNA(+)	29890	United Kingdom:England	United Kingdom	Homo sapiens		2021-06-27
OU394864	AY.4.2.1	ssRNA(+)	29890	United Kingdom:England	United Kingdom	Homo sapiens		2021-06-11
OU813404	AY.4.2.1	ssRNA(+)	29896	United Kingdom:England	United Kingdom	Homo sapiens		2021-07-14
OU815578	AY.4.2.1	ssRNA(+)	29890	United Kingdom:England	United Kingdom	Homo sapiens		2021-07-15
OU804284	AY.4.2.2	ssRNA(+)	29896	United Kingdom:England	United Kingdom	Homo sapiens		2021-07-13
OU811364	AY.4.2.2	ssRNA(+)	29896	United Kingdom:England	United Kingdom	Homo sapiens		2021-08-31
OU813763	AY.4.2.2	ssRNA(+)	29890	United Kingdom:England	United Kingdom	Homo sapiens		2021-09-02
OU421185	AY.4.2.3	ssRNA(+)	29890	United Kingdom:England	United Kingdom	Homo sapiens		2021-06-08
OU732427	AY.4.2.3	ssRNA(+)	29890	United Kingdom:England	United Kingdom	Homo sapiens		2021-07-31
OL989407	AY.4.2.3	ssRNA(+)	29815	Bangladesh	Bangladesh	Homo sapiens	oronasopharynx	2021-08-12
OU801261	AY.4.3	ssRNA(+)	29896	United Kingdom:England	United Kingdom	Homo sapiens		2021-07-15
OU859879	AY.4.3	ssRNA(+)	29890	United Kingdom:England	United Kingdom	Homo sapiens		2021-09-23
OU893797	AY.4.3	ssRNA(+)	29896	United Kingdom:England	United Kingdom	Homo sapiens		2021-09-26
OV103636	AY.4.4	ssRNA(+)	29860	Slovakia	Slovakia	Homo sapiens		2021-03-09
OU857579	AY.4.4	ssRNA(+)	29890	Slovakia	Slovakia	Homo sapiens		2021-06-09
OU857780	AY.4.4	ssRNA(+)	29896	Slovakia	Slovakia	Homo sapiens		2021-06-09
OU447774	AY.4.5	ssRNA(+)	29890	United Kingdom:England	United Kingdom	Homo sapiens		2021-07-09
OU491538	AY.4.5	ssRNA(+)	29891	United Kingdom:England	United Kingdom	Homo sapiens		2021-07-16
OU706459	AY.4.5	ssRNA(+)	29896	Slovakia	Slovakia	Homo sapiens		2021-07-20
OU659542	AY.4.6	ssRNA(+)	29890	United Kingdom:England	United Kingdom	Homo sapiens		2021-01-27
OU793087	AY.4.6	ssRNA(+)	29890	United Kingdom:England	United Kingdom	Homo sapiens		2021-06-01
OU417887	AY.4.6	ssRNA(+)	29896	United Kingdom:England	United Kingdom	Homo sapiens		2021-06-01
OU390668	AY.41	ssRNA(+)	29890	United Kingdom:England	United Kingdom	Homo sapiens		2021-06-23
OU706505	AY.41	ssRNA(+)	29896	Slovakia	Slovakia	Homo sapiens		2021-07-16
OU820029	AY.41	ssRNA(+)	29896	Slovakia	Slovakia	Homo sapiens		2021-07-22
OV103774	AY.42	ssRNA(+)	29860	Slovakia	Slovakia	Homo sapiens		2021-01-09
OV103791	AY.42	ssRNA(+)	29873	Slovakia	Slovakia	Homo sapiens		2021-01-09
OV104042	AY.42	ssRNA(+)	29878	Slovakia	Slovakia	Homo sapiens		2021-01-09
OV103587	AY.43	ssRNA(+)	29852	Slovakia	Slovakia	Homo sapiens		2021-01-09
OV103932	AY.43	ssRNA(+)	29808	Slovakia	Slovakia	Homo sapiens		2021-01-09
OV104284	AY.43	ssRNA(+)	29885	Slovakia	Slovakia	Homo sapiens		2021-01-09
OV077955	AY.43.1	ssRNA(+)	29889	Slovakia	Slovakia	Homo sapiens		2021-10-26
OV077720	AY.43.1	ssRNA(+)	29881	Slovakia	Slovakia	Homo sapiens		2021-10-29
OV077630	AY.43.1	ssRNA(+)	29890	Slovakia	Slovakia	Homo sapiens		2021-10-30
OK659945	AY.43.3	ssRNA(+)	29888	USA: Florida	USA	Homo sapiens	oronasopharynx	2021-10-07
OL765073	AY.43.3	ssRNA(+)	29836	USA: NY	USA	Homo sapiens		2021-11-01
OL743886	AY.43.3	ssRNA(+)	29836	USA: NY	USA	Homo sapiens		2021-11-01
OV104159	AY.43.4	ssRNA(+)	29863	Slovakia	Slovakia	Homo sapiens		2021-08-17
OU979847	AY.43.4	ssRNA(+)	29890	United Kingdom:England	United Kingdom	Homo sapiens		2021-10-14
OL993951	AY.43.4	ssRNA(+)	29703	USA: Idaho	USA	Homo sapiens	oronasopharynx	2021-12-08
OL857289	AY.44	ssRNA(+)	29769	USA: Arkansas	USA	Homo sapiens	oronasopharynx	2021-04-22
MZ363028	AY.44	ssRNA(+)	29818	USA	USA	Homo sapiens		2021-05-05
MZ363067	AY.44	ssRNA(+)	29826	USA	USA	Homo sapiens		2021-05-05
OU491986	AY.45	ssRNA(+)	29896	United Kingdom:England	United Kingdom	Homo sapiens		2021-07-04
OU487944	AY.45	ssRNA(+)	29890	United Kingdom:England	United Kingdom	Homo sapiens		2021-07-05
OU488897	AY.45	ssRNA(+)	29896	United Kingdom:England	United Kingdom	Homo sapiens		2021-07-05
OV104057	AY.46	ssRNA(+)	29805	Slovakia	Slovakia	Homo sapiens		2021-01-09
OU807616	AY.46	ssRNA(+)	29896	United Kingdom:England	United Kingdom	Homo sapiens		2021-05-24
OU808928	AY.46	ssRNA(+)	29884	United Kingdom:England	United Kingdom	Homo sapiens		2021-05-24
OL782944	AY.46.1	ssRNA(+)	29764	USA: Virginia	USA	Homo sapiens		2021-09-20
OL782943	AY.46.1	ssRNA(+)	29764	USA: Virginia	USA	Homo sapiens		2021-09-21
OL782888	AY.46.1	ssRNA(+)	29764	USA: Virginia	USA	Homo sapiens		2021-09-28
OL704423	AY.46.2	ssRNA(+)	29648	USA: Louisiana, Lafourche	USA	Homo sapiens	oronasopharynx	2021-08-15
OV104017	AY.46.2	ssRNA(+)	29853	Slovakia	Slovakia	Homo sapiens		2021-08-30
OL791471	AY.46.2	ssRNA(+)	29793	USA	USA	Homo sapiens		2021-09-15
OL858582	AY.46.3	ssRNA(+)	29815	USA: Minnesota	USA	Homo sapiens	oronasopharynx	2021-11-28
OU819701	AY.46.4	ssRNA(+)	29896	Slovakia	Slovakia	Homo sapiens		2021-06-12
MZ637354	AY.46.4	ssRNA(+)	29767	USA: Louisiana, Orleans	USA	Homo sapiens	oronasopharynx	2021-07-18
MZ637371	AY.46.4	ssRNA(+)	29765	USA: Louisiana, Orleans	USA	Homo sapiens	oronasopharynx	2021-07-18
OU861395	AY.46.5	ssRNA(+)	29890	United Kingdom:England	United Kingdom	Homo sapiens		2021-02-09
OU808742	AY.46.5	ssRNA(+)	29890	United Kingdom:England	United Kingdom	Homo sapiens		2021-05-31
OU385196	AY.46.5	ssRNA(+)	29890	United Kingdom:England	United Kingdom	Homo sapiens		2021-06-15
OV104542	AY.46.6	ssRNA(+)	29888	Slovakia	Slovakia	Homo sapiens		2021-01-09
OV103956	AY.46.6	ssRNA(+)	29860	Slovakia	Slovakia	Homo sapiens		2021-02-09
OV104065	AY.46.6	ssRNA(+)	29876	Slovakia	Slovakia	Homo sapiens		2021-02-09
OU393480	AY.47	ssRNA(+)	29896	United Kingdom:England	United Kingdom	Homo sapiens		2021-05-03
OU385104	AY.47	ssRNA(+)	29890	United Kingdom:England	United Kingdom	Homo sapiens		2021-05-04
OU390058	AY.47	ssRNA(+)	29890	United Kingdom:England	United Kingdom	Homo sapiens		2021-05-05
MZ193484	AY.48	ssRNA(+)	29820	USA: Minnesota	USA	Homo sapiens		2021-04-20
OU799897	AY.48	ssRNA(+)	29895	United Kingdom:England	United Kingdom	Homo sapiens		2021-05-30
MZ714377	AY.48	ssRNA(+)	29896	USA: Ohio	USA	Homo sapiens	oronasopharynx	2021-07-11
MZ558110	AY.49	ssRNA(+)	29836	India	India	Homo sapiens		2021-05-20
MZ741333	AY.49	ssRNA(+)	29835	USA: Florida	USA	Homo sapiens		2021-07-17
OK023876	AY.49	ssRNA(+)	29835	USA: Florida	USA	Homo sapiens		2021-07-24
OU593375	AY.5	ssRNA(+)	29896	United Kingdom:England	United Kingdom	Homo sapiens		2020-11-15
OU809154	AY.5	ssRNA(+)	29896	United Kingdom:England	United Kingdom	Homo sapiens		2021-01-02
OU418994	AY.5	ssRNA(+)	29890	United Kingdom:England	United Kingdom	Homo sapiens		2021-04-23
OU862325	AY.5.2	ssRNA(+)	29890	United Kingdom:England	United Kingdom	Homo sapiens		2021-09-22
OL866252	AY.5.3	ssRNA(+)	29852	USA: Durham, NC	USA	Homo sapiens	oronasopharynx	2021-07-23
OL866257	AY.5.3	ssRNA(+)	29829	USA: Raleigh, NC	USA	Homo sapiens	oronasopharynx	2021-07-24
OK240413	AY.5.3	ssRNA(+)	29730	USA: Colorado	USA	Homo sapiens	oronasopharynx	2021-07-25
OU385681	AY.5.4	ssRNA(+)	29896	United Kingdom:England	United Kingdom	Homo sapiens		2021-05-13
OU805926	AY.5.4	ssRNA(+)	29896	United Kingdom:England	United Kingdom	Homo sapiens		2021-05-31
OU804610	AY.5.4	ssRNA(+)	29896	United Kingdom:England	United Kingdom	Homo sapiens		2021-06-02
OK342106	AY.50	ssRNA(+)	29875	India	India	Homo sapiens		2021-04-19
OK093194	AY.50	ssRNA(+)	29775	USA	USA	Homo sapiens		2021-07-30
OK042812	AY.50	ssRNA(+)	29775	USA	USA	Homo sapiens		2021-07-30
OU489940	AY.51	ssRNA(+)	29890	United Kingdom:England	United Kingdom	Homo sapiens		2021-07-25
OU662624	AY.51	ssRNA(+)	29890	United Kingdom:England	United Kingdom	Homo sapiens		2021-08-07
OK350815	AY.51	ssRNA(+)	29829	USA: GA	USA	Homo sapiens		2021-09-19
OL847800	AY.52	ssRNA(+)	29881	USA	USA	Homo sapiens		2021-07-08
OL847987	AY.52	ssRNA(+)	29862	USA	USA	Homo sapiens		2021-07-08
OU417717	AY.52	ssRNA(+)	29896	United Kingdom:England	United Kingdom	Homo sapiens		2021-05-03
OU706294	AY.53	ssRNA(+)	29896	Slovakia	Slovakia	Homo sapiens		2021-07-01
OU706368	AY.53	ssRNA(+)	29896	Slovakia	Slovakia	Homo sapiens		2021-07-02
OU706565	AY.53	ssRNA(+)	29896	Slovakia	Slovakia	Homo sapiens		2021-07-02
OL701640	AY.54	ssRNA(+)	29822	USA: TN	USA	Homo sapiens		2021-07-04
OL701641	AY.54	ssRNA(+)	29822	USA: TN	USA	Homo sapiens		2021-07-04
OL847749	AY.54	ssRNA(+)	29867	USA	USA	Homo sapiens		2021-07-06
OL866255	AY.55	ssRNA(+)	29852	USA: Elizabethtown, NC	USA	Homo sapiens	oronasopharynx	2021-07-26
OL800009	AY.55	ssRNA(+)	29802	USA: Michigan	USA	Homo sapiens	swab	2021-08-14
OL800012	AY.55	ssRNA(+)	29802	USA: Michigan	USA	Homo sapiens	swab	2021-08-14
OK189643	AY.56	ssRNA(+)	29886	India	India	Homo sapiens		2021-09-10
OU811183	AY.57	ssRNA(+)	29890	United Kingdom:England	United Kingdom	Homo sapiens		2021-07-20
OL797925	AY.57	ssRNA(+)	29869	USA: New Hampshire	USA	Homo sapiens		2021-11-29
OL773839	AY.57	ssRNA(+)	29812	USA: California	USA	Homo sapiens	oronasopharynx	2021-11-29
OU391742	AY.58	ssRNA(+)	29890	United Kingdom:England	United Kingdom	Homo sapiens		2021-05-04
OU393243	AY.58	ssRNA(+)	29890	United Kingdom:England	United Kingdom	Homo sapiens		2021-05-04
OU423021	AY.58	ssRNA(+)	29890	United Kingdom:England	United Kingdom	Homo sapiens		2021-05-11
MZ558101	AY.59	ssRNA(+)	29837	India	India	Homo sapiens		2021-05-16
MZ558086	AY.59	ssRNA(+)	29837	India	India	Homo sapiens		2021-05-21
MZ558087	AY.59	ssRNA(+)	29837	India	India	Homo sapiens		2021-05-21
OL779084	AY.6	ssRNA(+)	29725	Malawi	Malawi	Homo sapiens		2021-02-04
OU395798	AY.6	ssRNA(+)	29890	United Kingdom:England	United Kingdom	Homo sapiens		2021-05-10
OU387916	AY.6	ssRNA(+)	29890	United Kingdom:England	United Kingdom	Homo sapiens		2021-05-18
OU706400	AY.60	ssRNA(+)	29896	Slovakia	Slovakia	Homo sapiens		2021-07-04
OU706299	AY.60	ssRNA(+)	29896	Slovakia	Slovakia	Homo sapiens		2021-07-05
OU706274	AY.60	ssRNA(+)	29896	Slovakia	Slovakia	Homo sapiens		2021-07-08
OU348289	AY.61	ssRNA(+)	29890	United Kingdom:England	United Kingdom	Homo sapiens		2020-07-07
OU348053	AY.61	ssRNA(+)	29896	United Kingdom:England	United Kingdom	Homo sapiens		2021-04-28
OU393504	AY.61	ssRNA(+)	29896	United Kingdom:England	United Kingdom	Homo sapiens		2021-05-16
MZ716097	AY.62	ssRNA(+)	29775	USA: New Jersey	USA	Homo sapiens	oronasopharynx	2021-06-25
MZ716194	AY.62	ssRNA(+)	29775	USA: New Jersey	USA	Homo sapiens	oronasopharynx	2021-06-25
MZ591180	AY.62	ssRNA(+)	29775	USA: Florida	USA	Homo sapiens	oronasopharynx	2021-06-29
OV195568	AY.63	ssRNA(+)	29890	United Kingdom:England	United Kingdom	Homo sapiens
OV133652	AY.63	ssRNA(+)	29890	Slovakia	Slovakia	Homo sapiens		2021-09-17
OL731750	AY.63	ssRNA(+)	29816	USA: Nevada	USA	Homo sapiens		2021-11-09
MZ917741	AY.64	ssRNA(+)	29797	USA: Arizona, Mohave	USA	Homo sapiens		2021-06-04
OL942727	AY.64	ssRNA(+)	29770	USA: Oklahoma	USA	Homo sapiens		2021-08-06
OL770416	AY.64	ssRNA(+)	29701	USA: Texas	USA	Homo sapiens	oronasopharynx	2021-08-09
OU814162	AY.65	ssRNA(+)	29890	United Kingdom:England	United Kingdom	Homo sapiens		2021-05-27
OU392138	AY.65	ssRNA(+)	29890	United Kingdom:England	United Kingdom	Homo sapiens		2021-05-28
MZ683347	AY.65	ssRNA(+)	29820	Bahrain	Bahrain	Homo sapiens		2021-06-26
OM009371	AY.67	ssRNA(+)	29769	USA	USA	Homo sapiens		2021-07-06
OL847727	AY.67	ssRNA(+)	29874	USA	USA	Homo sapiens		2021-07-06
OL847731	AY.67	ssRNA(+)	29861	USA	USA	Homo sapiens		2021-07-06
OU857433	AY.68	ssRNA(+)	29890	Slovakia	Slovakia	Homo sapiens		2021-06-09
MZ519580	AY.68	ssRNA(+)	29763	USA: Minnesota	USA	Homo sapiens		2021-06-21
OU706448	AY.68	ssRNA(+)	29896	Slovakia	Slovakia	Homo sapiens		2021-06-28
OL788890	AY.69	ssRNA(+)	29769	USA: Washington	USA	Homo sapiens	oronasopharynx	2021-11-26
OU706356	AY.69	ssRNA(+)	29896	Slovakia	Slovakia	Homo sapiens		2021-07-01
OU387010	AY.7	ssRNA(+)	29890	United Kingdom:England	United Kingdom	Homo sapiens		2021-05-15
OU387651	AY.7	ssRNA(+)	29890	United Kingdom:England	United Kingdom	Homo sapiens		2021-05-15
OU391959	AY.7	ssRNA(+)	29890	United Kingdom:England	United Kingdom	Homo sapiens		2021-05-19
OV104393	AY.7.1	ssRNA(+)	29853	Slovakia	Slovakia	Homo sapiens		2021-02-09
OU799889	AY.7.1	ssRNA(+)	29896	United Kingdom:England	United Kingdom	Homo sapiens		2021-05-29
OU802391	AY.7.1	ssRNA(+)	29896	United Kingdom:England	United Kingdom	Homo sapiens		2021-05-29
MZ558154	AY.7.2	ssRNA(+)	29838	India	India	Homo sapiens		2021-06-22
OU706488	AY.7.2	ssRNA(+)	29896	Slovakia	Slovakia	Homo sapiens		2021-07-12
OU706909	AY.7.2	ssRNA(+)	29896	Slovakia	Slovakia	Homo sapiens		2021-08-13
OU393732	AY.70	ssRNA(+)	29890	United Kingdom:England	United Kingdom	Homo sapiens		2021-04-22
OU386810	AY.70	ssRNA(+)	29896	United Kingdom:England	United Kingdom	Homo sapiens		2021-04-24
MZ390874	AY.70	ssRNA(+)	29775	USA: Ohio	USA	Homo sapiens	oronasopharynx	2021-05-21
OU857756	AY.71	ssRNA(+)	29890	Slovakia	Slovakia	Homo sapiens		2021-04-09
MZ558119	AY.71	ssRNA(+)	29837	India	India	Homo sapiens		2021-05-25
OU396798	AY.71	ssRNA(+)	29888	United Kingdom:England	United Kingdom	Homo sapiens		2021-05-30
OM037209	AY.72	ssRNA(+)	29837	USA: Virginia	USA	Homo sapiens		2021-11-25
OL837781	AY.72	ssRNA(+)	29758	USA: Pennsylvania	USA	Homo sapiens	oronasopharynx	2021-11-26
OU859154	AY.72	ssRNA(+)	29881	United Kingdom:England	United Kingdom	Homo sapiens		2021-09-07
MZ859114	AY.73	ssRNA(+)	29638	USA: Florida	USA	Homo sapiens	oronasopharynx	2021-07-30
OL702280	AY.73	ssRNA(+)	29769	USA	USA	Homo sapiens		2021-10-21
OL815913	AY.73	ssRNA(+)	29764	USA	USA	Homo sapiens		2021-11-02
OM000262	AY.74	ssRNA(+)	29730	USA: Washington	USA	Homo sapiens		2021-07-15
OU662440	AY.74	ssRNA(+)	29890	United Kingdom:England	United Kingdom	Homo sapiens		2021-08-07
OK287896	AY.74	ssRNA(+)	29818	USA: Louisiana, Terrebonne	USA	Homo sapiens	oronasopharynx	2021-08-10
OU386248	AY.75	ssRNA(+)	29890	United Kingdom:England	United Kingdom	Homo sapiens		2021-04-21
OU388900	AY.75	ssRNA(+)	29896	United Kingdom:England	United Kingdom	Homo sapiens		2021-05-03
OU385871	AY.75	ssRNA(+)	29896	United Kingdom:England	United Kingdom	Homo sapiens		2021-05-05
OL966510	AY.75.2	ssRNA(+)	29814	Bangladesh	Bangladesh	Homo sapiens	oronasopharynx	2021-07-14
OK386464	AY.75.2	ssRNA(+)	29868	USA	USA	Homo sapiens		2021-08-03
OL850521	AY.76	ssRNA(+)	29787	USA	USA	Homo sapiens		2021-10-11
OV077979	AY.76	ssRNA(+)	29889	Slovakia	Slovakia	Homo sapiens		2021-10-28
OL850640	AY.76	ssRNA(+)	29786	USA	USA	Homo sapiens		2021-11-15
OM045101	AY.77	ssRNA(+)	29769	USA	USA	Homo sapiens		2021-11-04
OL921409	AY.77	ssRNA(+)	29816	USA: Pennsylvania	USA	Homo sapiens		2021-11-10
OL921700	AY.77	ssRNA(+)	29815	USA: California	USA	Homo sapiens		2021-11-10
OL708266	AY.78	ssRNA(+)	29787	USA: Colorado	USA	Homo sapiens	oronasopharynx	2021-11-03
OM059615	AY.78	ssRNA(+)	29764	USA	USA	Homo sapiens		2021-11-12
OL829447	AY.78	ssRNA(+)	29787	USA: Colorado	USA	Homo sapiens	oronasopharynx	2021-11-12
OM057606	AY.79	ssRNA(+)	29764	USA: Minnesota	USA	Homo sapiens		2021-09-12
OM038127	AY.79	ssRNA(+)	29769	USA: FL	USA	Homo sapiens		2021-09-24
OM001154	AY.79	ssRNA(+)	29836	USA: TX	USA	Homo sapiens	oronasopharynx	2021-10-20
OU031856	AY.8	ssRNA(+)	29890	United Kingdom:England	United Kingdom	Homo sapiens		2021-04-22
OU348121	AY.8	ssRNA(+)	29890	United Kingdom:England	United Kingdom	Homo sapiens		2021-05-03
OU422085	AY.8	ssRNA(+)	29890	United Kingdom:England	United Kingdom	Homo sapiens		2021-05-06
OL910965	AY.80	ssRNA(+)	29811	Bangladesh	Bangladesh	Homo sapiens	oronasopharynx	2021-06-29
OL911018	AY.80	ssRNA(+)	29800	Bangladesh	Bangladesh	Homo sapiens	oronasopharynx	2021-06-29
OL958520	AY.80	ssRNA(+)	29810	Bangladesh	Bangladesh	Homo sapiens	oronasopharynx	2021-07-11
OL901792	AY.81	ssRNA(+)	29794	USA	USA	Homo sapiens		2021-08-30
OL791642	AY.81	ssRNA(+)	29793	USA	USA	Homo sapiens		2021-09-06
OL791390	AY.81	ssRNA(+)	29789	USA	USA	Homo sapiens		2021-09-08
OL939146	AY.82	ssRNA(+)	29822	USA: New York	USA	Homo sapiens		2021-11-23
OK104614	AY.83	ssRNA(+)	29903	Egypt	Egypt	Homo sapiens	oronasopharynx	2021-09-01
OK104599	AY.83	ssRNA(+)	29903	Egypt	Egypt	Homo sapiens	oronasopharynx	2021-09-04
OL850160	AY.83	ssRNA(+)	29822	USA	USA	Homo sapiens		2021-09-28
OV103943	AY.84	ssRNA(+)	29860	Slovakia	Slovakia	Homo sapiens		2021-04-09
OU422781	AY.84	ssRNA(+)	29891	United Kingdom:England	United Kingdom	Homo sapiens		2021-05-29
OU443282	AY.84	ssRNA(+)	29891	United Kingdom:England	United Kingdom	Homo sapiens		2021-06-07
OL757800	AY.85	ssRNA(+)	29809	Myanmar	Myanmar	Homo sapiens	oronasopharynx	2021-11-03
OL757804	AY.85	ssRNA(+)	29813	Myanmar	Myanmar	Homo sapiens	oronasopharynx	2021-11-12
OL784898	AY.85	ssRNA(+)	29837	USA: California	USA	Homo sapiens	oronasopharynx	2021-11-29
OL966472	AY.86	ssRNA(+)	29808	Bangladesh	Bangladesh	Homo sapiens	oronasopharynx	2021-07-13
OL922780	AY.86	ssRNA(+)	29809	USA: Minnesota	USA	Homo sapiens		2021-11-12
OL718291	AY.86	ssRNA(+)	29886	USA: Massachusetts	USA	Homo sapiens		2021-11-20
OU813265	AY.87	ssRNA(+)	29890	United Kingdom:England	United Kingdom	Homo sapiens		2021-05-22
OU813720	AY.87	ssRNA(+)	29890	United Kingdom:England	United Kingdom	Homo sapiens		2021-05-26
OU798191	AY.87	ssRNA(+)	29896	United Kingdom:England	United Kingdom	Homo sapiens		2021-05-28
OU390271	AY.88	ssRNA(+)	29890	United Kingdom:England	United Kingdom	Homo sapiens		2021-06-18
OU802953	AY.88	ssRNA(+)	29890	United Kingdom:England	United Kingdom	Homo sapiens		2021-06-27
OU814635	AY.88	ssRNA(+)	29890	United Kingdom:England	United Kingdom	Homo sapiens		2021-06-27
OU421406	AY.89	ssRNA(+)	29895	United Kingdom:England	United Kingdom	Homo sapiens		2021-06-15
OU706284	AY.89	ssRNA(+)	29896	Slovakia	Slovakia	Homo sapiens		2021-07-08
OU819540	AY.89	ssRNA(+)	29890	Switzerland:TI	Switzerland	Homo sapiens		2021-08-27
OU391621	AY.9	ssRNA(+)	29890	United Kingdom:England	United Kingdom	Homo sapiens		2021-04-19
OU390879	AY.9	ssRNA(+)	29890	United Kingdom:England	United Kingdom	Homo sapiens		2021-04-22
OU390131	AY.9	ssRNA(+)	29890	United Kingdom:England	United Kingdom	Homo sapiens		2021-04-25
OV103805	AY.9.2	ssRNA(+)	29887	Slovakia	Slovakia	Homo sapiens		2021-01-09
OV103831	AY.9.2	ssRNA(+)	29889	Slovakia	Slovakia	Homo sapiens		2021-01-09
OU857593	AY.9.2	ssRNA(+)	29890	Slovakia	Slovakia	Homo sapiens		2021-01-09
OU533554	AY.90	ssRNA(+)	29890	United Kingdom:England	United Kingdom	Homo sapiens		2021-05-25
OU419101	AY.90	ssRNA(+)	29890	United Kingdom:England	United Kingdom	Homo sapiens		2021-05-29
OU422482	AY.90	ssRNA(+)	29890	United Kingdom:England	United Kingdom	Homo sapiens		2021-05-29
OV082160	AY.91	ssRNA(+)	29873	United Kingdom:England	United Kingdom	Homo sapiens		2021-10-25
OL705801	AY.91	ssRNA(+)	29806	USA	USA	Homo sapiens		2021-10-26
OV086140	AY.91	ssRNA(+)	29873	United Kingdom:England	United Kingdom	Homo sapiens		2021-10-27
OU388217	AY.92	ssRNA(+)	29891	United Kingdom:England	United Kingdom	Homo sapiens		2021-06-07
OU389100	AY.92	ssRNA(+)	29896	United Kingdom:England	United Kingdom	Homo sapiens		2021-06-07
OU488816	AY.92	ssRNA(+)	29890	United Kingdom:England	United Kingdom	Homo sapiens		2021-07-05
OU706611	AY.93	ssRNA(+)	29896	Slovakia	Slovakia	Homo sapiens		2021-07-15
OU737421	AY.93	ssRNA(+)	29890	United Kingdom:England	United Kingdom	Homo sapiens		2021-08-25
OL834175	AY.93	ssRNA(+)	29767	USA: California	USA	Homo sapiens	oronasopharynx	2021-11-20
OU819459	AY.94	ssRNA(+)	29890	Slovakia	Slovakia	Homo sapiens		2021-07-20
OU706754	AY.94	ssRNA(+)	29896	Slovakia	Slovakia	Homo sapiens		2021-08-01
OU819851	AY.94	ssRNA(+)	29890	Slovakia	Slovakia	Homo sapiens		2021-08-02
OV082762	AY.95	ssRNA(+)	29903	United Kingdom:England	United Kingdom	Homo sapiens		2021-10-27
OL729553	AY.95	ssRNA(+)	29823	USA: Colorado	USA	Homo sapiens		2021-11-03
OL739594	AY.95	ssRNA(+)	29890	USA: Ohio	USA	Homo sapiens	oronasopharynx	2021-11-14
OU388681	AY.96	ssRNA(+)	29896	United Kingdom:England	United Kingdom	Homo sapiens		2021-04-28
OU390364	AY.96	ssRNA(+)	29901	United Kingdom:England	United Kingdom	Homo sapiens		2021-05-27
OU804546	AY.96	ssRNA(+)	29896	United Kingdom:England	United Kingdom	Homo sapiens		2021-06-05
OU819603	AY.97	ssRNA(+)	29895	Slovakia	Slovakia	Homo sapiens		2021-08-14
OU999514	AY.97	ssRNA(+)	29890	United Kingdom:England	United Kingdom	Homo sapiens		2021-10-10
OV009784	AY.97	ssRNA(+)	29890	United Kingdom:England	United Kingdom	Homo sapiens		2021-10-12
OU384636	AY.98	ssRNA(+)	29890	United Kingdom:England	United Kingdom	Homo sapiens		2021-06-01
OU390290	AY.98	ssRNA(+)	29890	United Kingdom:England	United Kingdom	Homo sapiens		2021-06-01
OU393253	AY.98	ssRNA(+)	29890	United Kingdom:England	United Kingdom	Homo sapiens		2021-06-01
OV103689	AY.98.1	ssRNA(+)	29888	Slovakia	Slovakia	Homo sapiens		2021-01-09
OV104177	AY.98.1	ssRNA(+)	29869	Slovakia	Slovakia	Homo sapiens		2021-03-09
MZ356904	AY.98.1	ssRNA(+)	29836	India	India	Homo sapiens	oronasopharynx	2021-04-16
OU489838	AY.99	ssRNA(+)	29890	United Kingdom:England	United Kingdom	Homo sapiens		2021-07-18
OU593642	AY.99	ssRNA(+)	29896	United Kingdom:England	United Kingdom	Homo sapiens		2021-07-30
OU797780	AY.99	ssRNA(+)	29890	United Kingdom:England	United Kingdom	Homo sapiens		2021-09-01
OL788745	AY.99.1	ssRNA(+)	29769	USA: Florida	USA	Homo sapiens	oronasopharynx	2021-11-21
OK189619	AY.99.2	ssRNA(+)	29888	India	India	Homo sapiens		2021-09-10
OV010982	AY.99.2	ssRNA(+)	29896	United Kingdom:England	United Kingdom	Homo sapiens		2021-10-14
OL730259	AY.99.2	ssRNA(+)	29823	USA: Tennessee	USA	Homo sapiens	oronasopharynx	2021-11-04
OU706634	AZ.2	ssRNA(+)	29888	Slovakia	Slovakia	Homo sapiens		2021-07-08
OU706689	AZ.2	ssRNA(+)	29888	Slovakia	Slovakia	Homo sapiens		2021-07-09
OU391272	AZ.4	ssRNA(+)	29873	United Kingdom:England	United Kingdom	Homo sapiens		2021-04-30
OU396539	AZ.4	ssRNA(+)	29872	United Kingdom:England	United Kingdom	Homo sapiens		2021-05-11
MT019529	B	ssRNA(+)	29899	China: Hubei, Wuhan	China	Homo sapiens	lung	2019-12-23
MT291827	B	ssRNA(+)	29858	China: Wuhan	China	Homo sapiens	lung	2019-12-30
MT291828	B	ssRNA(+)	29858	China: Wuhan	China	Homo sapiens	lung	2019-12-30
MZ824628	B.1	ssRNA(+)	29903	China	China	Homo sapiens	oronasopharynx	2020-01-26
MW368440	B.1	ssRNA(+)	29782	Germany	Germany	Homo sapiens		2020-01-28
MT270101	B.1	ssRNA(+)	29782	Germany: Bavaria	Germany	Homo sapiens		2020-01-28
OU572558	B.1	ssRNA(+)	29903	Switzerland:GE	Switzerland	Homo sapiens		2021-07-08
OU572493	B.1	ssRNA(+)	29903	Switzerland:GE	Switzerland	Homo sapiens		2021-07-04
OU572559	B.1	ssRNA(+)	29897	Switzerland	Switzerland	Homo sapiens		2021-07-05
OU572568	B.1	ssRNA(+)	29897	Switzerland:GE	Switzerland	Homo sapiens		2021-07-08
MW672632	B.1.1	ssRNA(+)	29817	Israel	Israel	Homo sapiens		2020-02-27
LR878220	B.1.1	ssRNA(+)	29782	Netherlands:Delft	Netherlands	Homo sapiens		2020-02-28
LR878222	B.1.1	ssRNA(+)	29761	Netherlands:Diemen	Netherlands	Homo sapiens		2020-02-28
FR996805	B.1.1.1	ssRNA(+)	29782	United Kingdom:England	United Kingdom	Homo sapiens		2020-03-04
FR996801	B.1.1.1	ssRNA(+)	29782	United Kingdom:England	United Kingdom	Homo sapiens		2020-03-07
OL817241	B.1.1.1	ssRNA(+)	29812	USA: Michigan	USA	Homo sapiens	swab	2020-03-09
OA967506	B.1.1.10	ssRNA(+)	29782	United Kingdom:England	United Kingdom	Homo sapiens		2020-03-08
FR996846	B.1.1.10	ssRNA(+)	29782	United Kingdom:England	United Kingdom	Homo sapiens		2020-03-12
FR996371	B.1.1.10	ssRNA(+)	29782	United Kingdom:England	United Kingdom	Homo sapiens		2020-03-13
MT953887	B.1.1.101	ssRNA(+)	29800	India: Patan	India	Homo sapiens		2020-07-06
MT953890	B.1.1.101	ssRNA(+)	29800	India: Patan	India	Homo sapiens		2020-07-06
OL473993	B.1.1.101	ssRNA(+)	29714	USA	USA	Homo sapiens	oronasopharynx	2021-01-25
OA976647	B.1.1.107	ssRNA(+)	29903	United Kingdom:England	United Kingdom	Homo sapiens		2020-06-07
OA976656	B.1.1.107	ssRNA(+)	29903	United Kingdom:England	United Kingdom	Homo sapiens		2020-06-07
OA976197	B.1.1.107	ssRNA(+)	29903	United Kingdom:England	United Kingdom	Homo sapiens		2020-06-08
OA980800	B.1.1.109	ssRNA(+)	29903	United Kingdom:England	United Kingdom	Homo sapiens		2020-06-01
OA981192	B.1.1.109	ssRNA(+)	29903	United Kingdom:England	United Kingdom	Homo sapiens		2020-06-01
OA976195	B.1.1.109	ssRNA(+)	29903	United Kingdom:England	United Kingdom	Homo sapiens		2020-06-08
MW030272	B.1.1.110	ssRNA(+)	29520	Peru	Peru	Homo sapiens		2020-05-04
OD905577	B.1.1.111	ssRNA(+)	29903	United Kingdom:England	United Kingdom	Homo sapiens		2020-10-12
MW940528	B.1.1.113	ssRNA(+)	29782	USA	USA	Homo sapiens	oronasopharynx	2020-03-18
MW940529	B.1.1.113	ssRNA(+)	29782	USA	USA	Homo sapiens	oronasopharynx	2020-03-18
MW190335	B.1.1.113	ssRNA(+)	29782	USA: CA	USA	Homo sapiens		2020-03-19
OA990331	B.1.1.115	ssRNA(+)	29903	United Kingdom:England	United Kingdom	Homo sapiens		2020-05-09
OA976177	B.1.1.115	ssRNA(+)	29903	United Kingdom:England	United Kingdom	Homo sapiens		2020-06-08
OA980426	B.1.1.115	ssRNA(+)	29903	United Kingdom:England	United Kingdom	Homo sapiens		2020-06-09
MT831840	B.1.1.116	ssRNA(+)	29882	USA: Washington,Benton County	USA	Homo sapiens		2020-06-17
MW593583	B.1.1.116	ssRNA(+)	29798	USA: Washington	USA	Homo sapiens	oronasopharynx	2020-07-07
MW593666	B.1.1.116	ssRNA(+)	29798	USA: Washington	USA	Homo sapiens	oronasopharynx	2020-07-27
OA979386	B.1.1.117	ssRNA(+)	29903	United Kingdom:England	United Kingdom	Homo sapiens		2020-07-16
OK650103	B.1.1.117	ssRNA(+)	29800	USA	USA	Homo sapiens		2020-12-01
OL844085	B.1.1.117	ssRNA(+)	29825	USA	USA	Homo sapiens		2020-12-02
MW752984	B.1.1.118	ssRNA(+)	29725	USA: TX	USA	Homo sapiens	oronasopharynx	2020-06-28
MW738834	B.1.1.118	ssRNA(+)	29725	USA: TX	USA	Homo sapiens	oronasopharynx	2020-06-26
MW738836	B.1.1.118	ssRNA(+)	29725	USA: TX	USA	Homo sapiens	oronasopharynx	2020-06-26
OA965620	B.1.1.119	ssRNA(+)	29782	United Kingdom:Northern Ireland	United Kingdom	Homo sapiens		2020-04-15
OA966050	B.1.1.119	ssRNA(+)	29782	United Kingdom:Northern Ireland	United Kingdom	Homo sapiens		2020-04-17
FR999067	B.1.1.119	ssRNA(+)	29782	United Kingdom:Northern Ireland	United Kingdom	Homo sapiens		2020-04-18
OA980741	B.1.1.12	ssRNA(+)	29903	United Kingdom:England	United Kingdom	Homo sapiens		2020-06-02
OA981206	B.1.1.12	ssRNA(+)	29903	United Kingdom:England	United Kingdom	Homo sapiens		2020-06-04
OA981208	B.1.1.12	ssRNA(+)	29903	United Kingdom:England	United Kingdom	Homo sapiens		2020-06-04
OA980813	B.1.1.120	ssRNA(+)	29894	United Kingdom:England	United Kingdom	Homo sapiens		2020-06-01
OA981184	B.1.1.120	ssRNA(+)	29894	United Kingdom:England	United Kingdom	Homo sapiens		2020-06-01
OA976710	B.1.1.120	ssRNA(+)	29894	United Kingdom:England	United Kingdom	Homo sapiens		2020-06-07
OA967614	B.1.1.121	ssRNA(+)	29903	United Kingdom:England	United Kingdom	Homo sapiens		2020-05-15
MW309426	B.1.1.121	ssRNA(+)	29782	Canada	Canada	Homo sapiens		2020-09-04
OK651309	B.1.1.121	ssRNA(+)	29782	USA	USA	Homo sapiens		2020-12-02
MZ254583	B.1.1.122	ssRNA(+)	29709	USA: Arizona	USA	Homo sapiens	oronasopharynx	2021-05-10
OA993806	B.1.1.123	ssRNA(+)	29903	United Kingdom:England	United Kingdom	Homo sapiens		2020-05-18
OA980787	B.1.1.123	ssRNA(+)	29903	United Kingdom:England	United Kingdom	Homo sapiens		2020-06-02
OA981154	B.1.1.123	ssRNA(+)	29903	United Kingdom:England	United Kingdom	Homo sapiens		2020-06-02
OA981141	B.1.1.125	ssRNA(+)	29903	United Kingdom:England	United Kingdom	Homo sapiens		2020-06-02
OA981320	B.1.1.125	ssRNA(+)	29903	United Kingdom:England	United Kingdom	Homo sapiens		2020-06-04
OA976901	B.1.1.125	ssRNA(+)	29903	United Kingdom:England	United Kingdom	Homo sapiens		2020-06-07
OK547909	B.1.1.128	ssRNA(+)	29598	USA: California,San Diego	USA	Homo sapiens	oronasopharynx	2020-06-03
MW389604	B.1.1.128	ssRNA(+)	29867	USA: California	USA	Homo sapiens		2020-06-18
MT811528	B.1.1.128	ssRNA(+)	29409	USA: San Diego, California	USA	Homo sapiens	oronasopharynx	2020-06-18
OA967527	B.1.1.13	ssRNA(+)	29782	United Kingdom:England	United Kingdom	Homo sapiens		2020-03-14
FR995696	B.1.1.13	ssRNA(+)	29782	United Kingdom:England	United Kingdom	Homo sapiens		2020-03-28
FR996162	B.1.1.13	ssRNA(+)	29827	United Kingdom:England	United Kingdom	Homo sapiens		2020-03-30
OA970952	B.1.1.130	ssRNA(+)	29903	United Kingdom:England	United Kingdom	Homo sapiens		2020-07-31
OA969893	B.1.1.130	ssRNA(+)	29903	United Kingdom:England	United Kingdom	Homo sapiens		2020-08-05
OA969295	B.1.1.130	ssRNA(+)	29903	United Kingdom:England	United Kingdom	Homo sapiens		2020-08-07
MT811288	B.1.1.132	ssRNA(+)	29409	USA: San Diego, California	USA	Homo sapiens	oronasopharynx	2020-04-23
MZ842863	B.1.1.132	ssRNA(+)	29899	USA: CA, Orange County	USA	Homo sapiens		2020-04-28
MT750384	B.1.1.132	ssRNA(+)	29806	USA: CA	USA	Homo sapiens		2020-04-28
MT745677	B.1.1.133	ssRNA(+)	29844	Australia: Victoria	Australia	Homo sapiens		2020-06-15
MT745714	B.1.1.133	ssRNA(+)	29818	Australia: Victoria	Australia	Homo sapiens		2020-06-20
OA969279	B.1.1.133	ssRNA(+)	29903	United Kingdom:England	United Kingdom	Homo sapiens		2020-07-31
OA993439	B.1.1.134	ssRNA(+)	29903	United Kingdom:England	United Kingdom	Homo sapiens		2020-05-06
OA993832	B.1.1.134	ssRNA(+)	29903	United Kingdom:England	United Kingdom	Homo sapiens		2020-05-06
OA969440	B.1.1.134	ssRNA(+)	29903	United Kingdom:England	United Kingdom	Homo sapiens		2020-05-18
MT981419	B.1.1.135	ssRNA(+)	29818	USA: SC, HORRY	USA	Homo sapiens	oronasopharynx	2020-06-04
MT892966	B.1.1.135	ssRNA(+)	29823	USA: Minnesota	USA	Homo sapiens		2020-06-17
MW067802	B.1.1.135	ssRNA(+)	29820	USA: SC, GEORGETOWN	USA	Homo sapiens	oronasopharynx	2020-06-19
MT745646	B.1.1.136	ssRNA(+)	29815	Australia: Victoria	Australia	Homo sapiens		2020-06-03
OA980878	B.1.1.136	ssRNA(+)	29903	United Kingdom:England	United Kingdom	Homo sapiens		2020-06-08
MT745673	B.1.1.136	ssRNA(+)	29842	Australia: Victoria	Australia	Homo sapiens		2020-06-12
FR999090	B.1.1.137	ssRNA(+)	29783	United Kingdom:England	United Kingdom	Homo sapiens		2020-04-12
OA978500	B.1.1.138	ssRNA(+)	29903	United Kingdom:England	United Kingdom	Homo sapiens		2020-06-22
OA979667	B.1.1.138	ssRNA(+)	29903	United Kingdom:England	United Kingdom	Homo sapiens		2020-06-29
OA973804	B.1.1.138	ssRNA(+)	29903	United Kingdom:England	United Kingdom	Homo sapiens		2020-07-01
MZ842598	B.1.1.139	ssRNA(+)	29851	USA: CA, Santa Clara County	USA	Homo sapiens		2020-06-17
MZ842587	B.1.1.139	ssRNA(+)	29851	USA: CA, Santa Clara County	USA	Homo sapiens		2020-06-29
MZ842705	B.1.1.139	ssRNA(+)	29612	USA: CA, Madera County	USA	Homo sapiens		2020-07-18
OA966194	B.1.1.14	ssRNA(+)	29903	United Kingdom:Scotland	United Kingdom	Homo sapiens		2020-04-16
OA966112	B.1.1.14	ssRNA(+)	29903	United Kingdom:Scotland	United Kingdom	Homo sapiens		2020-04-18
OA966117	B.1.1.14	ssRNA(+)	29903	United Kingdom:Scotland	United Kingdom	Homo sapiens		2020-04-18
OL365597	B.1.1.141	ssRNA(+)	29812	USA	USA	Homo sapiens		2020-11-12
MW868565	B.1.1.141	ssRNA(+)	29827	USA: Georgia	USA	Homo sapiens	oronasopharynx	2021-03-14
MZ535901	B.1.1.141	ssRNA(+)	29782	USA: New York	USA	Homo sapiens	oronasopharynx	2021-06-21
MT886351	B.1.1.142	ssRNA(+)	29729	USA: Maine	USA	Homo sapiens	oronasopharynx	2020-03-19
OD903090	B.1.1.144	ssRNA(+)	29903	United Kingdom:England	United Kingdom	Homo sapiens		2020-11-20
OD907778	B.1.1.144	ssRNA(+)	29903	United Kingdom:England	United Kingdom	Homo sapiens		2020-11-18
OA981529	B.1.1.145	ssRNA(+)	29903	United Kingdom:England	United Kingdom	Homo sapiens		2020-05-20
OA981288	B.1.1.145	ssRNA(+)	29903	United Kingdom:England	United Kingdom	Homo sapiens		2020-05-25
OA981253	B.1.1.145	ssRNA(+)	29903	United Kingdom:England	United Kingdom	Homo sapiens		2020-06-07
OA966505	B.1.1.147	ssRNA(+)	29903	United Kingdom:England	United Kingdom	Homo sapiens		2020-06-04
OA976938	B.1.1.147	ssRNA(+)	29903	United Kingdom:England	United Kingdom	Homo sapiens		2020-06-16
OA976957	B.1.1.147	ssRNA(+)	29903	United Kingdom:England	United Kingdom	Homo sapiens		2020-06-16
FR999323	B.1.1.148	ssRNA(+)	29782	United Kingdom:Northern Ireland	United Kingdom	Homo sapiens		2020-04-12
MW738835	B.1.1.148	ssRNA(+)	29725	USA: TX	USA	Homo sapiens	oronasopharynx	2020-06-26
OA981151	B.1.1.149	ssRNA(+)	29901	United Kingdom:England	United Kingdom	Homo sapiens		2020-06-02
OA975921	B.1.1.149	ssRNA(+)	29901	United Kingdom:England	United Kingdom	Homo sapiens		2020-06-08
OA976860	B.1.1.149	ssRNA(+)	29901	United Kingdom:England	United Kingdom	Homo sapiens		2020-06-09
OA976799	B.1.1.15	ssRNA(+)	29903	United Kingdom:England	United Kingdom	Homo sapiens		2020-06-09
OA975287	B.1.1.15	ssRNA(+)	29903	United Kingdom:England	United Kingdom	Homo sapiens		2020-06-23
OA979257	B.1.1.15	ssRNA(+)	29903	United Kingdom:England	United Kingdom	Homo sapiens		2020-06-29
OA998212	B.1.1.153	ssRNA(+)	29903	United Kingdom:England	United Kingdom	Homo sapiens		2020-09-30
OA996559	B.1.1.153	ssRNA(+)	29903	United Kingdom:England	United Kingdom	Homo sapiens		2020-10-06
OB982540	B.1.1.153	ssRNA(+)	29894	United Kingdom:England	United Kingdom	Homo sapiens		2020-10-15
OA981363	B.1.1.154	ssRNA(+)	29903	United Kingdom:England	United Kingdom	Homo sapiens		2020-06-11
OA981139	B.1.1.155	ssRNA(+)	29903	United Kingdom:England	United Kingdom	Homo sapiens		2020-06-02
OA981144	B.1.1.155	ssRNA(+)	29903	United Kingdom:England	United Kingdom	Homo sapiens		2020-06-02
OA976908	B.1.1.155	ssRNA(+)	29902	United Kingdom:England	United Kingdom	Homo sapiens		2020-06-07
MT834348	B.1.1.158	ssRNA(+)	29845	USA: Washington,Mason County	USA	Homo sapiens		2020-06-01
MT831207	B.1.1.158	ssRNA(+)	29869	USA: Washington,Franklin County	USA	Homo sapiens		2020-06-03
MT831209	B.1.1.158	ssRNA(+)	29868	USA: Washington,Yakima County	USA	Homo sapiens		2020-06-03
OA990968	B.1.1.159	ssRNA(+)	29903	United Kingdom:England	United Kingdom	Homo sapiens		2020-10-06
OA996321	B.1.1.159	ssRNA(+)	29903	United Kingdom:England	United Kingdom	Homo sapiens		2020-10-06
OB993154	B.1.1.159	ssRNA(+)	29903	United Kingdom:Scotland	United Kingdom	Homo sapiens		2020-10-27
MT459852	B.1.1.16	ssRNA(+)	29818	Greece: Athens	Greece	Homo sapiens		2020-03-11
OA966004	B.1.1.160	ssRNA(+)	29782	United Kingdom:Northern Ireland	United Kingdom	Homo sapiens		2020-05-03
OA966067	B.1.1.160	ssRNA(+)	29782	United Kingdom:Northern Ireland	United Kingdom	Homo sapiens		2020-05-03
OA965566	B.1.1.160	ssRNA(+)	29782	United Kingdom:Northern Ireland	United Kingdom	Homo sapiens		2020-05-04
MZ842765	B.1.1.161	ssRNA(+)	29862	USA: CA, San Francisco County	USA	Homo sapiens		2020-03-23
OU813965	B.1.1.161	ssRNA(+)	29867	United Kingdom:England	United Kingdom	Homo sapiens		2020-05-06
OU810699	B.1.1.161	ssRNA(+)	29871	United Kingdom:England	United Kingdom	Homo sapiens		2020-06-04
OA971860	B.1.1.162	ssRNA(+)	29782	United Kingdom:England	United Kingdom	Homo sapiens		2020-03-30
OA967233	B.1.1.164	ssRNA(+)	29903	United Kingdom:England	United Kingdom	Homo sapiens		2020-03-20
OA966697	B.1.1.164	ssRNA(+)	29903	United Kingdom:England	United Kingdom	Homo sapiens		2020-03-21
LR883892	B.1.1.164	ssRNA(+)	29768	Netherlands:not collected	Netherlands	Homo sapiens		2020-03-25
OA994427	B.1.1.165	ssRNA(+)	29903	United Kingdom:England	United Kingdom	Homo sapiens		2020-08-28
OA994429	B.1.1.165	ssRNA(+)	29903	United Kingdom:England	United Kingdom	Homo sapiens		2020-08-28
OA994441	B.1.1.165	ssRNA(+)	29903	United Kingdom:England	United Kingdom	Homo sapiens		2020-08-28
FR996318	B.1.1.166	ssRNA(+)	29782	United Kingdom:England	United Kingdom	Homo sapiens		2020-03-23
FR995971	B.1.1.166	ssRNA(+)	29822	United Kingdom:England	United Kingdom	Homo sapiens		2020-03-30
FR995197	B.1.1.166	ssRNA(+)	29849	United Kingdom:England	United Kingdom	Homo sapiens		2020-04-01
FR997081	B.1.1.168	ssRNA(+)	29782	United Kingdom:England	United Kingdom	Homo sapiens		2020-03-31
OA967282	B.1.1.168	ssRNA(+)	29903	United Kingdom:England	United Kingdom	Homo sapiens		2020-04-18
OA967289	B.1.1.168	ssRNA(+)	29903	United Kingdom:England	United Kingdom	Homo sapiens		2020-04-18
MW865421	B.1.1.169	ssRNA(+)	29727	USA: TX	USA	Homo sapiens		2020-07-07
MW815795	B.1.1.169	ssRNA(+)	29725	USA: TX	USA	Homo sapiens	oronasopharynx	2020-07-07
MW279423	B.1.1.169	ssRNA(+)	29882	USA	USA	Homo sapiens	oronasopharynx	2020-08-25
BS001081	B.1.1.17	ssRNA(+)	29782	Japan:Kanto	Japan	Homo sapiens	oronasopharynx	2021-02-16
OA969920	B.1.1.170	ssRNA(+)	29903	United Kingdom:Scotland	United Kingdom	Homo sapiens		2020-07-19
OA973863	B.1.1.170	ssRNA(+)	29903	United Kingdom:England	United Kingdom	Homo sapiens		2020-08-22
OA971342	B.1.1.170	ssRNA(+)	29903	United Kingdom:England	United Kingdom	Homo sapiens		2020-08-24
FR993948	B.1.1.171	ssRNA(+)	29782	United Kingdom:England	United Kingdom	Homo sapiens		2020-03-30
OA966355	B.1.1.171	ssRNA(+)	29903	United Kingdom:England	United Kingdom	Homo sapiens		2020-04-02
OA964627	B.1.1.171	ssRNA(+)	29782	United Kingdom:England	United Kingdom	Homo sapiens		2020-04-03
MZ842831	B.1.1.172	ssRNA(+)	29873	USA: CA, Orange County	USA	Homo sapiens		2020-04-15
MZ842851	B.1.1.172	ssRNA(+)	29901	USA: CA, Orange County	USA	Homo sapiens		2020-04-15
MT750411	B.1.1.172	ssRNA(+)	29806	USA: CA	USA	Homo sapiens		2020-04-15
MW483205	B.1.1.174	ssRNA(+)	29797	USA: CA, Santa Clara County	USA	Homo sapiens		2020-03-31
MW483370	B.1.1.174	ssRNA(+)	29809	USA: CA, Alameda County	USA	Homo sapiens		2020-05-14
MW483373	B.1.1.174	ssRNA(+)	29813	USA: CA, Alameda County	USA	Homo sapiens		2020-05-14
MT581432	B.1.1.175	ssRNA(+)	29812	Bangladesh	Bangladesh	Homo sapiens	oronasopharynx	2020-04-29
MT581436	B.1.1.175	ssRNA(+)	29822	Bangladesh	Bangladesh	Homo sapiens	oronasopharynx	2020-04-29
MT607974	B.1.1.175	ssRNA(+)	29826	Bangladesh	Bangladesh	Homo sapiens	oronasopharynx	2020-05-24
MW736131	B.1.1.177	ssRNA(+)	29727	USA: TX	USA	Homo sapiens	oronasopharynx	2020-06-26
FR995239	B.1.1.178	ssRNA(+)	29849	United Kingdom:England	United Kingdom	Homo sapiens		2020-04-02
OU798050	B.1.1.178	ssRNA(+)	29853	United Kingdom:England	United Kingdom	Homo sapiens		2020-04-09
FR990214	B.1.1.178	ssRNA(+)	29782	United Kingdom:England	United Kingdom	Homo sapiens		2020-04-17
MT966138	B.1.1.180	ssRNA(+)	29857	USA: FL	USA	Homo sapiens		2020-06-08
MT834671	B.1.1.180	ssRNA(+)	29858	USA: FL	USA	Homo sapiens		2020-06-12
MT834672	B.1.1.180	ssRNA(+)	29865	USA: FL	USA	Homo sapiens		2020-06-12
MT786859	B.1.1.181	ssRNA(+)	29813	Turkey	Turkey	Homo sapiens	oronasopharynx	2020-07-15
MT786868	B.1.1.181	ssRNA(+)	29813	Turkey	Turkey	Homo sapiens	oronasopharynx	2020-07-15
MT787473	B.1.1.181	ssRNA(+)	29813	Turkey	Turkey	Homo sapiens	oronasopharynx	2020-07-15
OD910340	B.1.1.182	ssRNA(+)	29903	United Kingdom:England	United Kingdom	Homo sapiens		2020-12-10
OD910812	B.1.1.182	ssRNA(+)	29903	United Kingdom:England	United Kingdom	Homo sapiens		2020-12-11
OD910814	B.1.1.182	ssRNA(+)	29903	United Kingdom:England	United Kingdom	Homo sapiens		2020-12-11
LR878068	B.1.1.185	ssRNA(+)	29783	Netherlands:not collected	Netherlands	Homo sapiens		2020-04-02
LR883868	B.1.1.185	ssRNA(+)	29781	Netherlands:not collected	Netherlands	Homo sapiens		2020-04-05
LR883961	B.1.1.185	ssRNA(+)	29781	Netherlands:not collected	Netherlands	Homo sapiens		2020-04-07
MW907415	B.1.1.186	ssRNA(+)	29803	USA	USA	Homo sapiens	oronasopharynx	2020-06-25
MW056152	B.1.1.186	ssRNA(+)	29656	USA: FL	USA	Homo sapiens		2020-07-24
MW681125	B.1.1.186	ssRNA(+)	29903	USA: MD	USA	Homo sapiens		2020-07-27
OA969069	B.1.1.187	ssRNA(+)	29903	United Kingdom:Northern Ireland	United Kingdom	Homo sapiens		2020-08-11
OA973143	B.1.1.187	ssRNA(+)	29903	United Kingdom:England	United Kingdom	Homo sapiens		2020-08-31
OA973408	B.1.1.187	ssRNA(+)	29903	United Kingdom:England	United Kingdom	Homo sapiens		2020-08-31
MW366750	B.1.1.189	ssRNA(+)	29903	Tunisia	Tunisia	Homo sapiens	oronasopharynx	2020-04-11
OA969564	B.1.1.189	ssRNA(+)	29903	United Kingdom:England	United Kingdom	Homo sapiens		2020-08-09
OA971239	B.1.1.189	ssRNA(+)	29903	United Kingdom:England	United Kingdom	Homo sapiens		2020-08-10
MW040679	B.1.1.192	ssRNA(+)	29848	USA: FL	USA	Homo sapiens		2020-05-09
MW454564	B.1.1.192	ssRNA(+)	29877	USA: Massachusetts	USA	Homo sapiens		2020-07-06
MW067812	B.1.1.192	ssRNA(+)	29846	USA: SC, HORRY	USA	Homo sapiens	oronasopharynx	2020-07-10
OA998029	B.1.1.193	ssRNA(+)	29903	United Kingdom:England	United Kingdom	Homo sapiens		2020-09-30
OA996867	B.1.1.193	ssRNA(+)	29903	United Kingdom:England	United Kingdom	Homo sapiens		2020-10-04
OB986782	B.1.1.193	ssRNA(+)	29903	United Kingdom:England	United Kingdom	Homo sapiens		2020-10-21
OA981736	B.1.1.194	ssRNA(+)	29903	United Kingdom:England	United Kingdom	Homo sapiens		2020-04-27
FR993648	B.1.1.194	ssRNA(+)	29849	United Kingdom:England	United Kingdom	Homo sapiens		2020-04-12
OA974229	B.1.1.196	ssRNA(+)	29903	United Kingdom:England	United Kingdom	Homo sapiens		2020-08-26
OA972144	B.1.1.196	ssRNA(+)	29903	United Kingdom:England	United Kingdom	Homo sapiens		2020-09-07
OA982111	B.1.1.196	ssRNA(+)	29903	United Kingdom:England	United Kingdom	Homo sapiens		2020-09-11
OA975701	B.1.1.197	ssRNA(+)	29903	United Kingdom:England	United Kingdom	Homo sapiens		2020-06-08
FR999022	B.1.1.197	ssRNA(+)	29759	United Kingdom:England	United Kingdom	Homo sapiens		2020-05-11
FR993721	B.1.1.197	ssRNA(+)	29812	United Kingdom:England	United Kingdom	Homo sapiens		2020-04-15
OA967590	B.1.1.198	ssRNA(+)	29782	United Kingdom:England	United Kingdom	Homo sapiens		2020-04-03
MT451708	B.1.1.198	ssRNA(+)	29815	Australia: Victoria	Australia	Homo sapiens		2020-04-03
FR995134	B.1.1.198	ssRNA(+)	29782	United Kingdom:England	United Kingdom	Homo sapiens		2020-04-04
OA981283	B.1.1.200	ssRNA(+)	29903	United Kingdom:England	United Kingdom	Homo sapiens		2020-06-04
OA981326	B.1.1.200	ssRNA(+)	29903	United Kingdom:England	United Kingdom	Homo sapiens		2020-06-04
OA981328	B.1.1.200	ssRNA(+)	29903	United Kingdom:England	United Kingdom	Homo sapiens		2020-06-04
OA978739	B.1.1.201	ssRNA(+)	29903	United Kingdom:England	United Kingdom	Homo sapiens		2020-07-21
OA979141	B.1.1.201	ssRNA(+)	29903	United Kingdom:England	United Kingdom	Homo sapiens		2020-07-25
OA976590	B.1.1.203	ssRNA(+)	29903	United Kingdom:England	United Kingdom	Homo sapiens		2020-06-09
OA977611	B.1.1.203	ssRNA(+)	29903	United Kingdom:England	United Kingdom	Homo sapiens		2020-06-09
OA978308	B.1.1.203	ssRNA(+)	29903	United Kingdom:England	United Kingdom	Homo sapiens		2020-06-11
MT940526	B.1.1.204	ssRNA(+)	29800	India: Ahmedabad	India	Homo sapiens		2020-06-25
OA979650	B.1.1.204	ssRNA(+)	29903	United Kingdom:England	United Kingdom	Homo sapiens		2020-06-30
OA979651	B.1.1.204	ssRNA(+)	29903	United Kingdom:England	United Kingdom	Homo sapiens		2020-06-30
MW483306	B.1.1.205	ssRNA(+)	29802	USA: CA, Santa Clara County	USA	Homo sapiens		2020-05-16
MW483307	B.1.1.205	ssRNA(+)	29814	USA: CA, Santa Clara County	USA	Homo sapiens		2020-05-16
MW483212	B.1.1.205	ssRNA(+)	29821	USA: CA, Santa Clara County	USA	Homo sapiens		2020-05-17
MW883321	B.1.1.207	ssRNA(+)	29903	USA	USA	Homo sapiens	oronasopharynx	2020-08-18
MW974564	B.1.1.207	ssRNA(+)	29782	USA: Virginia	USA	Homo sapiens	oronasopharynx	2020-08-25
MW049023	B.1.1.207	ssRNA(+)	29898	USA: MD	USA	Homo sapiens		2020-09-18
FR996302	B.1.1.208	ssRNA(+)	29849	United Kingdom:England	United Kingdom	Homo sapiens		2020-03-22
FR999189	B.1.1.208	ssRNA(+)	29782	United Kingdom:England	United Kingdom	Homo sapiens		2020-04-20
FR998144	B.1.1.208	ssRNA(+)	29779	United Kingdom:England	United Kingdom	Homo sapiens		2020-04-30
OA972048	B.1.1.209	ssRNA(+)	29903	United Kingdom:England	United Kingdom	Homo sapiens		2020-09-07
OA990035	B.1.1.209	ssRNA(+)	29903	United Kingdom:England	United Kingdom	Homo sapiens		2020-09-23
OA998457	B.1.1.209	ssRNA(+)	29903	United Kingdom:England	United Kingdom	Homo sapiens		2020-09-30
MW738844	B.1.1.210	ssRNA(+)	29727	USA: TX	USA	Homo sapiens	oronasopharynx	2020-06-26
MW736097	B.1.1.210	ssRNA(+)	29726	USA: TX	USA	Homo sapiens	oronasopharynx	2020-06-05
FR995720	B.1.1.213	ssRNA(+)	29812	United Kingdom:England	United Kingdom	Homo sapiens		2020-03-30
FR995592	B.1.1.213	ssRNA(+)	29812	United Kingdom:England	United Kingdom	Homo sapiens		2020-03-31
FR995089	B.1.1.213	ssRNA(+)	29808	United Kingdom:England	United Kingdom	Homo sapiens		2020-04-03
OL636004	B.1.1.214	ssRNA(+)	29782	Japan	Japan	Homo sapiens	saliva, oronasopharynx	2020-03-02
BS000929	B.1.1.214	ssRNA(+)	29782	Japan:Kanto	Japan	Homo sapiens	oronasopharynx	2020-03-21
BS000941	B.1.1.214	ssRNA(+)	29782	Japan:Kanto	Japan	Homo sapiens	oronasopharynx	2020-04-07
MT972335	B.1.1.216	ssRNA(+)	29818	Australia: Victoria	Australia	Homo sapiens		2020-07-01
MW035444	B.1.1.216	ssRNA(+)	29782	USA: Wisconsin, Dane county	USA	Homo sapiens	oronasopharynx	2020-08-25
OA984026	B.1.1.216	ssRNA(+)	29903	United Kingdom:Scotland	United Kingdom	Homo sapiens		2020-09-10
OA981734	B.1.1.217	ssRNA(+)	29903	United Kingdom:England	United Kingdom	Homo sapiens		2020-04-26
OA993876	B.1.1.217	ssRNA(+)	29903	United Kingdom:England	United Kingdom	Homo sapiens		2020-05-06
OA981751	B.1.1.217	ssRNA(+)	29903	United Kingdom:England	United Kingdom	Homo sapiens		2020-05-14
OA978636	B.1.1.218	ssRNA(+)	29903	United Kingdom:England	United Kingdom	Homo sapiens		2020-07-21
OA978715	B.1.1.218	ssRNA(+)	29903	United Kingdom:England	United Kingdom	Homo sapiens		2020-07-23
OA969190	B.1.1.218	ssRNA(+)	29903	United Kingdom:England	United Kingdom	Homo sapiens		2020-08-03
OA975193	B.1.1.219	ssRNA(+)	29903	United Kingdom:England	United Kingdom	Homo sapiens		2020-08-18
OA974022	B.1.1.219	ssRNA(+)	29903	United Kingdom:England	United Kingdom	Homo sapiens		2020-08-27
OA982483	B.1.1.219	ssRNA(+)	29903	United Kingdom:England	United Kingdom	Homo sapiens		2020-09-09
OA967101	B.1.1.220	ssRNA(+)	29903	United Kingdom:England	United Kingdom	Homo sapiens		2020-03-23
OA967121	B.1.1.220	ssRNA(+)	29903	United Kingdom:England	United Kingdom	Homo sapiens		2020-03-24
OA967128	B.1.1.220	ssRNA(+)	29903	United Kingdom:England	United Kingdom	Homo sapiens		2020-03-24
OA979215	B.1.1.221	ssRNA(+)	29903	United Kingdom:England	United Kingdom	Homo sapiens		2020-07-21
MZ643410	B.1.1.222	ssRNA(+)	29881	Mexico	Mexico	Homo sapiens		2020-04-04
OK435900	B.1.1.222	ssRNA(+)	29826	Mexico	Mexico	Homo sapiens		2020-04-24
MT642111	B.1.1.222	ssRNA(+)	29868	USA: Washington, Yakima County	USA	Homo sapiens		2020-04-24
MT893667	B.1.1.225	ssRNA(+)	29853	USA: FL	USA	Homo sapiens		2020-06-22
MT893673	B.1.1.225	ssRNA(+)	29851	USA: FL	USA	Homo sapiens		2020-06-23
MT893677	B.1.1.225	ssRNA(+)	29844	USA: FL	USA	Homo sapiens		2020-06-27
MW420012	B.1.1.226	ssRNA(+)	29825	USA: TX	USA	Homo sapiens	oronasopharynx	2020-06-23
MW738801	B.1.1.226	ssRNA(+)	29726	USA: TX	USA	Homo sapiens	oronasopharynx	2020-06-26
MW738811	B.1.1.226	ssRNA(+)	29727	USA: TX	USA	Homo sapiens	oronasopharynx	2020-06-26
OA977002	B.1.1.227	ssRNA(+)	29903	United Kingdom:England	United Kingdom	Homo sapiens		2020-06-13
OA976059	B.1.1.227	ssRNA(+)	29903	United Kingdom:England	United Kingdom	Homo sapiens		2020-06-13
OA976443	B.1.1.227	ssRNA(+)	29903	United Kingdom:England	United Kingdom	Homo sapiens		2020-06-14
MZ906611	B.1.1.228	ssRNA(+)	29797	USA: Arizona	USA	Homo sapiens		2020-05-13
MW389605	B.1.1.228	ssRNA(+)	29900	USA: California	USA	Homo sapiens		2020-06-05
MW079829	B.1.1.228	ssRNA(+)	29878	USA: Ak	USA	Homo sapiens	oronasopharynx	2020-06-12
MW485806	B.1.1.229	ssRNA(+)	29790	Italy	Italy	Homo sapiens	oronasopharynx	2020-08-26
MW420686	B.1.1.230	ssRNA(+)	29781	USA	USA	Homo sapiens		2020-08-11
MT998443	B.1.1.230	ssRNA(+)	29782	USA: Oklahoma	USA	Homo sapiens	oronasopharynx	2020-05-27
MT998444	B.1.1.230	ssRNA(+)	29782	USA: Oklahoma	USA	Homo sapiens	oronasopharynx	2020-05-27
MW191397	B.1.1.231	ssRNA(+)	29782	USA: UT	USA	Homo sapiens		2020-03-13
MW493783	B.1.1.231	ssRNA(+)	29900	USA	USA	Homo sapiens	oronasopharynx	2020-03-15
MW494235	B.1.1.231	ssRNA(+)	29900	USA	USA	Homo sapiens	oronasopharynx	2020-03-15
OA980929	B.1.1.232	ssRNA(+)	29903	United Kingdom:England	United Kingdom	Homo sapiens		2020-06-19
OA975092	B.1.1.232	ssRNA(+)	29903	United Kingdom:England	United Kingdom	Homo sapiens		2020-06-22
OA979512	B.1.1.232	ssRNA(+)	29903	United Kingdom:England	United Kingdom	Homo sapiens		2020-06-29
OA968735	B.1.1.234	ssRNA(+)	29903	United Kingdom:England	United Kingdom	Homo sapiens		2020-08-13
OA974638	B.1.1.234	ssRNA(+)	29903	United Kingdom:England	United Kingdom	Homo sapiens		2020-08-21
OA972384	B.1.1.234	ssRNA(+)	29903	United Kingdom:England	United Kingdom	Homo sapiens		2020-09-03
OA983379	B.1.1.236	ssRNA(+)	29903	United Kingdom:England	United Kingdom	Homo sapiens		2020-09-09
OA983776	B.1.1.236	ssRNA(+)	29903	United Kingdom:England	United Kingdom	Homo sapiens		2020-09-09
OA983778	B.1.1.236	ssRNA(+)	29903	United Kingdom:England	United Kingdom	Homo sapiens		2020-09-09
OA977564	B.1.1.237	ssRNA(+)	29903	United Kingdom:England	United Kingdom	Homo sapiens		2020-06-10
OA976473	B.1.1.237	ssRNA(+)	29903	United Kingdom:Wales	United Kingdom	Homo sapiens		2020-06-11
OA976778	B.1.1.237	ssRNA(+)	29903	United Kingdom:England	United Kingdom	Homo sapiens		2020-06-12
MW565657	B.1.1.239	ssRNA(+)	29843	USA: CA, Alameda County	USA	Homo sapiens		2020-08-03
MW389640	B.1.1.239	ssRNA(+)	29856	USA: California	USA	Homo sapiens		2020-08-04
MW134446	B.1.1.239	ssRNA(+)	29853	USA: CA, Orange County	USA	Homo sapiens		2020-08-05
OA972675	B.1.1.240	ssRNA(+)	29903	United Kingdom:England	United Kingdom	Homo sapiens		2020-09-02
OA972722	B.1.1.240	ssRNA(+)	29903	United Kingdom:England	United Kingdom	Homo sapiens		2020-09-02
OA994772	B.1.1.240	ssRNA(+)	29903	United Kingdom:England	United Kingdom	Homo sapiens		2020-09-03
OA971208	B.1.1.241	ssRNA(+)	29903	United Kingdom:England	United Kingdom	Homo sapiens		2020-08-07
OA968636	B.1.1.241	ssRNA(+)	29903	United Kingdom:England	United Kingdom	Homo sapiens		2020-08-10
OA968988	B.1.1.241	ssRNA(+)	29903	United Kingdom:England	United Kingdom	Homo sapiens		2020-08-10
OA971348	B.1.1.242	ssRNA(+)	29903	United Kingdom:England	United Kingdom	Homo sapiens		2020-08-23
OA975233	B.1.1.243	ssRNA(+)	29903	United Kingdom:Wales	United Kingdom	Homo sapiens		2020-08-16
OA972015	B.1.1.243	ssRNA(+)	29903	United Kingdom:England	United Kingdom	Homo sapiens		2020-09-08
OA972021	B.1.1.243	ssRNA(+)	29903	United Kingdom:England	United Kingdom	Homo sapiens		2020-09-08
MT834664	B.1.1.244	ssRNA(+)	29861	USA: FL	USA	Homo sapiens		2020-06-10
MT966141	B.1.1.244	ssRNA(+)	29848	USA: FL	USA	Homo sapiens		2020-06-11
MT966144	B.1.1.244	ssRNA(+)	29869	USA: FL	USA	Homo sapiens		2020-06-12
FR996609	B.1.1.25	ssRNA(+)	29782	United Kingdom:England	United Kingdom	Homo sapiens		2020-03-31
MT476385	B.1.1.25	ssRNA(+)	29902	Bangladesh	Bangladesh	Homo sapiens		2020-04-18
MT566435	B.1.1.25	ssRNA(+)	29833	Bangladesh	Bangladesh	Homo sapiens	oronasopharynx	2020-04-28
MW471398	B.1.1.251	ssRNA(+)	29813	USA: North Dakota	USA	Homo sapiens	oronasopharynx	2020-06-02
MW035537	B.1.1.251	ssRNA(+)	29773	USA: Wisconsin, Dane county	USA	Homo sapiens	oronasopharynx	2020-09-06
MW035521	B.1.1.251	ssRNA(+)	29782	USA: Wisconsin, Dane county	USA	Homo sapiens	oronasopharynx	2020-09-07
OA990140	B.1.1.253	ssRNA(+)	29903	United Kingdom:England	United Kingdom	Homo sapiens		2020-05-09
OA969467	B.1.1.253	ssRNA(+)	29903	United Kingdom:England	United Kingdom	Homo sapiens		2020-05-18
OA980755	B.1.1.253	ssRNA(+)	29903	United Kingdom:England	United Kingdom	Homo sapiens		2020-06-02
MT451146	B.1.1.254	ssRNA(+)	29803	Australia: Victoria	Australia	Homo sapiens		2020-03-21
MZ331954	B.1.1.254	ssRNA(+)	29783	New Zealand	New Zealand	Homo sapiens		2020-03-23
FR995252	B.1.1.254	ssRNA(+)	29782	United Kingdom:England	United Kingdom	Homo sapiens		2020-04-03
OA976846	B.1.1.255	ssRNA(+)	29903	United Kingdom:England	United Kingdom	Homo sapiens		2020-06-09
OA976517	B.1.1.255	ssRNA(+)	29903	United Kingdom:England	United Kingdom	Homo sapiens		2020-06-12
OA975980	B.1.1.255	ssRNA(+)	29903	United Kingdom:England	United Kingdom	Homo sapiens		2020-06-12
OA981372	B.1.1.256	ssRNA(+)	29903	United Kingdom:England	United Kingdom	Homo sapiens		2020-05-21
OA980814	B.1.1.256	ssRNA(+)	29903	United Kingdom:England	United Kingdom	Homo sapiens		2020-06-01
OA980817	B.1.1.256	ssRNA(+)	29903	United Kingdom:England	United Kingdom	Homo sapiens		2020-06-01
FR996780	B.1.1.257	ssRNA(+)	29782	United Kingdom:England	United Kingdom	Homo sapiens		2020-03-02
FR996804	B.1.1.257	ssRNA(+)	29785	United Kingdom:England	United Kingdom	Homo sapiens		2020-03-05
FR996798	B.1.1.257	ssRNA(+)	29782	United Kingdom:England	United Kingdom	Homo sapiens		2020-03-06
MZ245534	B.1.1.258	ssRNA(+)	29837	USA	USA	Homo sapiens	oronasopharynx	2020-06-15
MW809193	B.1.1.258	ssRNA(+)	29725	USA: TX	USA	Homo sapiens	oronasopharynx	2020-06-18
MW799613	B.1.1.258	ssRNA(+)	29725	USA: TX	USA	Homo sapiens	oronasopharynx	2020-06-19
MT632825	B.1.1.26	ssRNA(+)	29852	USA: Washington,Yakima County	USA	Homo sapiens		2020-04-05
MT641530	B.1.1.26	ssRNA(+)	29870	USA: Washington,Yakima County	USA	Homo sapiens		2020-04-08
MT641527	B.1.1.26	ssRNA(+)	29860	USA: Washington,Yakima County	USA	Homo sapiens		2020-04-13
LR994803	B.1.1.261	ssRNA(+)	29903	Sweden	Sweden	Homo sapiens
LR994838	B.1.1.261	ssRNA(+)	29903	Sweden	Sweden	Homo sapiens
LR994865	B.1.1.261	ssRNA(+)	29903	Sweden	Sweden	Homo sapiens
OA970583	B.1.1.262	ssRNA(+)	29894	United Kingdom:England	United Kingdom	Homo sapiens		2020-06-16
OA970586	B.1.1.262	ssRNA(+)	29894	United Kingdom:England	United Kingdom	Homo sapiens		2020-06-16
OA970589	B.1.1.262	ssRNA(+)	29894	United Kingdom:England	United Kingdom	Homo sapiens		2020-06-16
MW521760	B.1.1.263	ssRNA(+)	29782	USA: OH	USA	Homo sapiens		2020-06-14
OA976126	B.1.1.263	ssRNA(+)	29903	United Kingdom:England	United Kingdom	Homo sapiens		2020-06-21
MT919783	B.1.1.263	ssRNA(+)	29799	Philippines: NCR, Caloocan City	Philippines	Homo sapiens	oronasopharynx	2020-07-15
MW493926	B.1.1.265	ssRNA(+)	29903	USA: Washington,King County	USA	Homo sapiens		2020-11-05
MW493935	B.1.1.265	ssRNA(+)	29903	USA: Washington,King County	USA	Homo sapiens		2020-11-08
MW483108	B.1.1.265	ssRNA(+)	29869	USA: MD	USA	Homo sapiens	oronasopharynx	2020-12-29
OA969720	B.1.1.266	ssRNA(+)	29903	United Kingdom:Scotland	United Kingdom	Homo sapiens		2020-08-02
OA969565	B.1.1.266	ssRNA(+)	29903	United Kingdom:Scotland	United Kingdom	Homo sapiens		2020-08-09
OA968079	B.1.1.266	ssRNA(+)	29903	United Kingdom:England	United Kingdom	Homo sapiens		2020-08-18
MW815742	B.1.1.268	ssRNA(+)	29725	USA: TX	USA	Homo sapiens	oronasopharynx	2020-06-18
MW747915	B.1.1.268	ssRNA(+)	29725	USA: TX	USA	Homo sapiens	oronasopharynx	2020-06-23
MW747917	B.1.1.268	ssRNA(+)	29726	USA: TX	USA	Homo sapiens	oronasopharynx	2020-06-23
OA972774	B.1.1.269	ssRNA(+)	29903	United Kingdom:England	United Kingdom	Homo sapiens		2020-07-29
OA972776	B.1.1.269	ssRNA(+)	29903	United Kingdom:England	United Kingdom	Homo sapiens		2020-07-29
OA972792	B.1.1.269	ssRNA(+)	29903	United Kingdom:England	United Kingdom	Homo sapiens		2020-07-31
OD898170	B.1.1.27	ssRNA(+)	29897	United Kingdom:England	United Kingdom	Homo sapiens		2020-11-14
MW332563	B.1.1.27	ssRNA(+)	29836	Bahrain	Bahrain	Homo sapiens		2020-11-11
FR996098	B.1.1.270	ssRNA(+)	29782	United Kingdom:England	United Kingdom	Homo sapiens		2020-03-21
FR995435	B.1.1.270	ssRNA(+)	29829	United Kingdom:England	United Kingdom	Homo sapiens		2020-04-01
FR995343	B.1.1.270	ssRNA(+)	29849	United Kingdom:England	United Kingdom	Homo sapiens		2020-04-04
OA997760	B.1.1.272	ssRNA(+)	29903	United Kingdom:England	United Kingdom	Homo sapiens		2020-09-30
OA998131	B.1.1.272	ssRNA(+)	29903	United Kingdom:England	United Kingdom	Homo sapiens		2020-10-01
OA996583	B.1.1.272	ssRNA(+)	29903	United Kingdom:England	United Kingdom	Homo sapiens		2020-10-04
MW279414	B.1.1.273	ssRNA(+)	29882	USA	USA	Homo sapiens	oronasopharynx	2020-04-23
FR994133	B.1.1.274	ssRNA(+)	29826	United Kingdom:England	United Kingdom	Homo sapiens		2020-04-10
FR994171	B.1.1.274	ssRNA(+)	29782	United Kingdom:England	United Kingdom	Homo sapiens		2020-04-11
FR994228	B.1.1.274	ssRNA(+)	29812	United Kingdom:England	United Kingdom	Homo sapiens		2020-04-11
FR994827	B.1.1.275	ssRNA(+)	29812	United Kingdom:England	United Kingdom	Homo sapiens		2020-04-03
OA965085	B.1.1.277	ssRNA(+)	29782	United Kingdom:England	United Kingdom	Homo sapiens		2020-03-21
FR996259	B.1.1.277	ssRNA(+)	29782	United Kingdom:England	United Kingdom	Homo sapiens		2020-03-22
OA965132	B.1.1.277	ssRNA(+)	29782	United Kingdom:England	United Kingdom	Homo sapiens		2020-03-29
OA965205	B.1.1.279	ssRNA(+)	29782	United Kingdom:England	United Kingdom	Homo sapiens		2020-03-24
FR995750	B.1.1.279	ssRNA(+)	29849	United Kingdom:England	United Kingdom	Homo sapiens		2020-03-30
FR995751	B.1.1.279	ssRNA(+)	29782	United Kingdom:England	United Kingdom	Homo sapiens		2020-03-30
MT738173	B.1.1.28	ssRNA(+)	29873	Brazil	Brazil	Homo sapiens		2020-03-20
MW483244	B.1.1.28	ssRNA(+)	29815	USA: CA, Santa Clara County	USA	Homo sapiens		2020-06-22
MT919776	B.1.1.28	ssRNA(+)	29816	Philippines: NCR, Pasay City	Philippines	Homo sapiens	oronasopharynx	2020-07-06
OA982584	B.1.1.280	ssRNA(+)	29903	United Kingdom:England	United Kingdom	Homo sapiens		2020-09-09
OA975457	B.1.1.280	ssRNA(+)	29903	United Kingdom:England	United Kingdom	Homo sapiens		2020-08-18
OA967794	B.1.1.280	ssRNA(+)	29903	United Kingdom:England	United Kingdom	Homo sapiens		2020-08-17
LR883534	B.1.1.282	ssRNA(+)	29780	Netherlands:not collected	Netherlands	Homo sapiens		2020-03-26
LR883246	B.1.1.282	ssRNA(+)	29783	Netherlands:not collected	Netherlands	Homo sapiens		2020-04-18
LR883387	B.1.1.282	ssRNA(+)	29777	Netherlands:not collected	Netherlands	Homo sapiens		2020-04-18
LC573289	B.1.1.283	ssRNA(+)	29888	Japan	Japan	Homo sapiens	oronasopharynx
LC556322	B.1.1.283	ssRNA(+)	29890	Japan	Japan	Homo sapiens
BS000719	B.1.1.284	ssRNA(+)	29782	Japan:Kanto	Japan	Homo sapiens	oronasopharynx	2020-05-30
BS000720	B.1.1.284	ssRNA(+)	29812	Japan:Kanto	Japan	Homo sapiens	oronasopharynx	2020-06-10
BS000721	B.1.1.284	ssRNA(+)	29812	Japan:Kanto	Japan	Homo sapiens	oronasopharynx	2020-06-11
BS000715	B.1.1.285	ssRNA(+)	29782	Japan:Kanto	Japan	Homo sapiens	oronasopharynx	2020-04-03
BS000686	B.1.1.285	ssRNA(+)	29782	Japan:Kanto	Japan	Homo sapiens	oronasopharynx	2020-04-06
BS000687	B.1.1.285	ssRNA(+)	29782	Japan:Kanto	Japan	Homo sapiens	oronasopharynx	2020-04-06
OA981119	B.1.1.286	ssRNA(+)	29903	United Kingdom:England	United Kingdom	Homo sapiens		2020-06-23
OA979671	B.1.1.286	ssRNA(+)	29903	United Kingdom:England	United Kingdom	Homo sapiens		2020-06-29
OA979642	B.1.1.286	ssRNA(+)	29903	United Kingdom:England	United Kingdom	Homo sapiens		2020-06-30
OB995906	B.1.1.288	ssRNA(+)	29903	United Kingdom:England	United Kingdom	Homo sapiens		2020-08-12
OA982257	B.1.1.288	ssRNA(+)	29903	United Kingdom:England	United Kingdom	Homo sapiens		2020-09-10
OA982370	B.1.1.288	ssRNA(+)	29903	United Kingdom:England	United Kingdom	Homo sapiens		2020-09-10
HG996834	B.1.1.289	ssRNA(+)	29903	United Kingdom:Oxford	United Kingdom	Homo sapiens		2020-04-29
FR999886	B.1.1.289	ssRNA(+)	29782	United Kingdom:England	United Kingdom	Homo sapiens		2020-05-31
OA981199	B.1.1.289	ssRNA(+)	29903	United Kingdom:England	United Kingdom	Homo sapiens		2020-06-06
MT821589	B.1.1.290	ssRNA(+)	29871	USA: Washington,Yakima County	USA	Homo sapiens		2020-05-11
MT821543	B.1.1.290	ssRNA(+)	29872	USA: Washington,Yakima County	USA	Homo sapiens		2020-05-14
MT821551	B.1.1.290	ssRNA(+)	29868	USA: Washington,Yakima County	USA	Homo sapiens		2020-05-14
FR994709	B.1.1.291	ssRNA(+)	29849	United Kingdom:England	United Kingdom	Homo sapiens		2020-04-06
MT642255	B.1.1.291	ssRNA(+)	29860	USA: Washington, Yakima County	USA	Homo sapiens		2020-04-27
MT642097	B.1.1.291	ssRNA(+)	29873	USA: Washington, Yakima County	USA	Homo sapiens		2020-05-03
OA971702	B.1.1.294	ssRNA(+)	29903	United Kingdom:England	United Kingdom	Homo sapiens		2020-07-04
OA979929	B.1.1.294	ssRNA(+)	29903	United Kingdom:England	United Kingdom	Homo sapiens		2020-07-06
OA978818	B.1.1.294	ssRNA(+)	29903	United Kingdom:England	United Kingdom	Homo sapiens		2020-07-12
OA967077	B.1.1.296	ssRNA(+)	29903	United Kingdom:England	United Kingdom	Homo sapiens		2020-05-04
OA967092	B.1.1.296	ssRNA(+)	29903	United Kingdom:England	United Kingdom	Homo sapiens		2020-05-04
OA967326	B.1.1.296	ssRNA(+)	29903	United Kingdom:England	United Kingdom	Homo sapiens		2020-05-04
OA973464	B.1.1.297	ssRNA(+)	29903	United Kingdom:England	United Kingdom	Homo sapiens		2020-08-31
MT919525	B.1.1.298	ssRNA(+)	29836	Denmark	Denmark	Neovison vison		2020-06-14
MT919526	B.1.1.298	ssRNA(+)	29836	Denmark	Denmark	Neovison vison		2020-06-14
MT919527	B.1.1.298	ssRNA(+)	29836	Denmark	Denmark	Neovison vison		2020-06-14
OA981373	B.1.1.299	ssRNA(+)	29903	United Kingdom:England	United Kingdom	Homo sapiens		2020-05-22
OA981380	B.1.1.299	ssRNA(+)	29903	United Kingdom:England	United Kingdom	Homo sapiens		2020-05-22
OA977436	B.1.1.299	ssRNA(+)	29900	United Kingdom:England	United Kingdom	Homo sapiens		2020-06-07
FR996508	B.1.1.3	ssRNA(+)	29812	United Kingdom:England	United Kingdom	Homo sapiens		2020-03-21
FR995749	B.1.1.3	ssRNA(+)	29782	United Kingdom:England	United Kingdom	Homo sapiens		2020-03-29
FR995792	B.1.1.3	ssRNA(+)	29783	United Kingdom:England	United Kingdom	Homo sapiens		2020-03-30
OA981426	B.1.1.300	ssRNA(+)	29903	United Kingdom:England	United Kingdom	Homo sapiens		2020-06-11
OA976458	B.1.1.300	ssRNA(+)	29903	United Kingdom:England	United Kingdom	Homo sapiens		2020-06-13
OA975826	B.1.1.300	ssRNA(+)	29903	United Kingdom:England	United Kingdom	Homo sapiens		2020-06-13
LR878257	B.1.1.301	ssRNA(+)	28996	Netherlands:NoordHolland	Netherlands	Homo sapiens		2020-03-03
OA981541	B.1.1.301	ssRNA(+)	29903	United Kingdom:England	United Kingdom	Homo sapiens		2020-05-22
OA981377	B.1.1.301	ssRNA(+)	29903	United Kingdom:England	United Kingdom	Homo sapiens		2020-05-23
OA979328	B.1.1.302	ssRNA(+)	29903	United Kingdom:England	United Kingdom	Homo sapiens		2020-07-16
OA974619	B.1.1.302	ssRNA(+)	29903	United Kingdom:England	United Kingdom	Homo sapiens		2020-08-21
OA971355	B.1.1.302	ssRNA(+)	29903	United Kingdom:England	United Kingdom	Homo sapiens		2020-08-24
OA976293	B.1.1.303	ssRNA(+)	29903	United Kingdom:England	United Kingdom	Homo sapiens		2020-06-09
OA981041	B.1.1.303	ssRNA(+)	29903	United Kingdom:England	United Kingdom	Homo sapiens		2020-06-24
OA979220	B.1.1.303	ssRNA(+)	29903	United Kingdom:England	United Kingdom	Homo sapiens		2020-06-29
MT890295	B.1.1.304	ssRNA(+)	29858	USA: FL	USA	Homo sapiens		2020-06-08
MW425727	B.1.1.304	ssRNA(+)	29891	USA: TX	USA	Homo sapiens	oronasopharynx	2020-06-13
MW816565	B.1.1.304	ssRNA(+)	29725	USA: TX	USA	Homo sapiens	oronasopharynx	2020-06-18
OA979372	B.1.1.305	ssRNA(+)	29903	United Kingdom:England	United Kingdom	Homo sapiens		2020-07-16
OA979683	B.1.1.305	ssRNA(+)	29903	United Kingdom:England	United Kingdom	Homo sapiens		2020-07-17
OA969152	B.1.1.305	ssRNA(+)	29903	United Kingdom:England	United Kingdom	Homo sapiens		2020-08-05
MT416725	B.1.1.306	ssRNA(+)	29866	India	India	Homo sapiens	oronasopharynx	2020-04-10
MT416726	B.1.1.306	ssRNA(+)	29866	India	India	Homo sapiens	oronasopharynx	2020-04-10
MT509507	B.1.1.306	ssRNA(+)	29800	India: Una	India	Homo sapiens		2020-05-10
OA969237	B.1.1.307	ssRNA(+)	29903	United Kingdom:England	United Kingdom	Homo sapiens		2020-08-03
OA971249	B.1.1.307	ssRNA(+)	29903	United Kingdom:England	United Kingdom	Homo sapiens		2020-08-06
OA974547	B.1.1.307	ssRNA(+)	29903	United Kingdom:England	United Kingdom	Homo sapiens		2020-08-09
OA982919	B.1.1.308	ssRNA(+)	29903	United Kingdom:England	United Kingdom	Homo sapiens		2020-09-10
OA983620	B.1.1.308	ssRNA(+)	29903	United Kingdom:England	United Kingdom	Homo sapiens		2020-09-10
OA983717	B.1.1.308	ssRNA(+)	29903	United Kingdom:England	United Kingdom	Homo sapiens		2020-09-10
OA969045	B.1.1.309	ssRNA(+)	29903	United Kingdom:England	United Kingdom	Homo sapiens		2020-08-11
OA968712	B.1.1.309	ssRNA(+)	29903	United Kingdom:England	United Kingdom	Homo sapiens		2020-08-12
OA971012	B.1.1.309	ssRNA(+)	29903	United Kingdom:England	United Kingdom	Homo sapiens		2020-08-12
OA979152	B.1.1.310	ssRNA(+)	29903	United Kingdom:England	United Kingdom	Homo sapiens		2020-07-15
OA972057	B.1.1.310	ssRNA(+)	29903	United Kingdom:England	United Kingdom	Homo sapiens		2020-09-07
OA983358	B.1.1.310	ssRNA(+)	29903	United Kingdom:England	United Kingdom	Homo sapiens		2020-09-09
OA970948	B.1.1.311	ssRNA(+)	29903	United Kingdom:England	United Kingdom	Homo sapiens		2020-07-29
OA971247	B.1.1.311	ssRNA(+)	29903	United Kingdom:England	United Kingdom	Homo sapiens		2020-07-31
OA969212	B.1.1.311	ssRNA(+)	29903	United Kingdom:England	United Kingdom	Homo sapiens		2020-08-03
MW922966	B.1.1.312	ssRNA(+)	29856	USA: CA, Alameda County	USA	Homo sapiens		2020-10-30
OK426843	B.1.1.312	ssRNA(+)	29782	New Zealand: Counties Manukau	New Zealand	Homo sapiens		2020-11-27
MW737834	B.1.1.312	ssRNA(+)	29859	West Bank: Tulkarem	West Bank	Homo sapiens	oronasopharynx	2020-11-30
OA972914	B.1.1.315	ssRNA(+)	29903	United Kingdom:Wales	United Kingdom	Homo sapiens		2020-08-29
OA984288	B.1.1.315	ssRNA(+)	29903	United Kingdom:Scotland	United Kingdom	Homo sapiens		2020-09-22
OA984300	B.1.1.315	ssRNA(+)	29903	United Kingdom:Scotland	United Kingdom	Homo sapiens		2020-09-22
MW617762	B.1.1.316	ssRNA(+)	29819	USA: Massachusetts	USA	Homo sapiens		2020-05-17
OK466139	B.1.1.316	ssRNA(+)	29893	USA: Arizona	USA	Homo sapiens		2020-09-15
OK547926	B.1.1.316	ssRNA(+)	29598	USA: California,San Diego	USA	Homo sapiens	oronasopharynx	2020-09-19
MW332232	B.1.1.317	ssRNA(+)	29834	Russia: Saratov	Russia	Homo sapiens	oronasopharynx	2020-04-29
MZ313046	B.1.1.317	ssRNA(+)	29849	USA: GA	USA	Homo sapiens		2020-05-06
MZ622025	B.1.1.317	ssRNA(+)	29663	Guinea	Guinea	Homo sapiens	oronasopharynx	2020-05-13
OD954334	B.1.1.318	ssRNA(+)	29873	United Kingdom:England	United Kingdom	Homo sapiens		2021-01-22
OD962444	B.1.1.318	ssRNA(+)	29874	United Kingdom:England	United Kingdom	Homo sapiens		2021-01-24
OD975638	B.1.1.318	ssRNA(+)	29873	United Kingdom:England	United Kingdom	Homo sapiens		2021-01-25
OK297559	B.1.1.318	ssRNA(+)	29873	USA: Wisconsin	USA	Homo sapiens		2021-04-13
OK431710	B.1.1.318	ssRNA(+)	29752	USA: Pennsylvania	USA	Homo sapiens	oronasopharynx	2021-03-14
OK431888	B.1.1.318	ssRNA(+)	29752	USA: Illinois	USA	Homo sapiens	oronasopharynx	2021-03-15
OK431978	B.1.1.318	ssRNA(+)	29752	USA: Illinois	USA	Homo sapiens	oronasopharynx	2021-02-25
OK432097	B.1.1.318	ssRNA(+)	29752	USA: Pennsylvania	USA	Homo sapiens	oronasopharynx	2021-03-06
OK432250	B.1.1.318	ssRNA(+)	29752	USA: Pennsylvania	USA	Homo sapiens	oronasopharynx	2021-03-07
OD960253	B.1.1.319	ssRNA(+)	29903	United Kingdom:England	United Kingdom	Homo sapiens		2020-12-16
MT569470	B.1.1.319	ssRNA(+)	29782	Serbia: Novi Sad	Serbia	Homo sapiens		2020-04-01
MW070087	B.1.1.320	ssRNA(+)	29816	USA: New Mexico	USA	Homo sapiens	oronasopharynx	2020-09-01
MW522499	B.1.1.320	ssRNA(+)	29782	USA: TX	USA	Homo sapiens		2020-09-04
MW521802	B.1.1.320	ssRNA(+)	29782	USA: TX	USA	Homo sapiens		2020-09-11
OL365638	B.1.1.322	ssRNA(+)	29805	USA	USA	Homo sapiens		2020-11-17
MW645580	B.1.1.322	ssRNA(+)	29815	USA	USA	Homo sapiens		2020-11-20
MW645585	B.1.1.322	ssRNA(+)	29815	USA	USA	Homo sapiens		2020-11-20
LR878251	B.1.1.323	ssRNA(+)	29786	Netherlands:NoordBrabant	Netherlands	Homo sapiens		2020-03-02
LR883273	B.1.1.323	ssRNA(+)	29781	Netherlands:not collected	Netherlands	Homo sapiens		2020-03-03
LR878109	B.1.1.323	ssRNA(+)	29771	Netherlands:not collected	Netherlands	Homo sapiens		2020-03-09
OA979325	B.1.1.325	ssRNA(+)	29903	United Kingdom:England	United Kingdom	Homo sapiens		2020-07-16
OA979339	B.1.1.325	ssRNA(+)	29903	United Kingdom:England	United Kingdom	Homo sapiens		2020-07-16
OA974980	B.1.1.326	ssRNA(+)	29903	United Kingdom:England	United Kingdom	Homo sapiens		2020-08-20
OA975004	B.1.1.326	ssRNA(+)	29903	United Kingdom:England	United Kingdom	Homo sapiens		2020-08-20
MW332551	B.1.1.326	ssRNA(+)	29837	Bahrain	Bahrain	Homo sapiens		2020-11-01
MW585952	B.1.1.328	ssRNA(+)	29876	USA: Florida	USA	Homo sapiens	oronasopharynx	2021-01-17
MW596050	B.1.1.328	ssRNA(+)	29854	USA: Florida	USA	Homo sapiens	oronasopharynx	2021-01-29
MW689793	B.1.1.328	ssRNA(+)	29834	USA: FL	USA	Homo sapiens		2021-02-03
OK436296	B.1.1.329	ssRNA(+)	29851	Mexico	Mexico	Homo sapiens		2020-06-02
MW420628	B.1.1.329	ssRNA(+)	29781	USA	USA	Homo sapiens		2020-08-03
MW420695	B.1.1.329	ssRNA(+)	29781	USA	USA	Homo sapiens		2020-08-03
MT646069	B.1.1.33	ssRNA(+)	29782	USA: DC	USA	Homo sapiens	oronasopharynx	2020-03-07
MT738101	B.1.1.33	ssRNA(+)	29903	Brazil	Brazil	Homo sapiens		2020-03-13
MT670013	B.1.1.33	ssRNA(+)	29782	Chile	Chile	Homo sapiens	oronasopharynx	2020-03-14
MW593671	B.1.1.334	ssRNA(+)	29798	USA: Washington	USA	Homo sapiens	oronasopharynx	2020-07-28
OB986370	B.1.1.334	ssRNA(+)	29854	United Kingdom:England	United Kingdom	Homo sapiens		2020-10-19
MW486275	B.1.1.334	ssRNA(+)	29782	USA: Wisconsin, Dane County	USA	Homo sapiens	oronasopharynx	2020-12-30
MT873285	B.1.1.335	ssRNA(+)	29903	USA: Massachusetts	USA	Homo sapiens	oronasopharynx	2020-04-17
MW555889	B.1.1.335	ssRNA(+)	29770	USA: Washington,King County	USA	Homo sapiens		2021-01-09
MW825673	B.1.1.335	ssRNA(+)	29782	USA: Ohio	USA	Homo sapiens	oronasopharynx	2021-03-10
MT958259	B.1.1.337	ssRNA(+)	29844	USA: Minnesota	USA	Homo sapiens	oronasopharynx	2020-08-04
MW599599	B.1.1.337	ssRNA(+)	29750	USA: Massachusetts	USA	Homo sapiens		2020-09-14
MW173407	B.1.1.337	ssRNA(+)	29857	USA: Washington,King County	USA	Homo sapiens		2020-09-19
OD927241	B.1.1.34	ssRNA(+)	29889	United Kingdom:England	United Kingdom	Homo sapiens		2020-12-14
OA994163	B.1.1.341	ssRNA(+)	29903	United Kingdom:England	United Kingdom	Homo sapiens		2020-09-14
OA994648	B.1.1.341	ssRNA(+)	29903	United Kingdom:England	United Kingdom	Homo sapiens		2020-09-15
OA990622	B.1.1.341	ssRNA(+)	29903	United Kingdom:England	United Kingdom	Homo sapiens		2020-09-17
OK435194	B.1.1.344	ssRNA(+)	29824	Mexico	Mexico	Homo sapiens		2020-04-09
MZ842811	B.1.1.344	ssRNA(+)	29901	USA: CA, San Joaquin County	USA	Homo sapiens		2020-04-11
OK435195	B.1.1.344	ssRNA(+)	29867	Mexico	Mexico	Homo sapiens		2020-04-12
MW782819	B.1.1.345	ssRNA(+)	29782	USA: Pennsylvania	USA	Homo sapiens	oronasopharynx	2021-03-02
MW668567	B.1.1.345	ssRNA(+)	29782	USA: New York	USA	Homo sapiens	oronasopharynx	2021-02-08
MW668842	B.1.1.345	ssRNA(+)	29782	USA: New York	USA	Homo sapiens	oronasopharynx	2021-02-04
OD900326	B.1.1.347	ssRNA(+)	29903	United Kingdom:England	United Kingdom	Homo sapiens		2020-11-14
OA984696	B.1.1.347	ssRNA(+)	29903	United Kingdom:England	United Kingdom	Homo sapiens		2020-08-16
OA968878	B.1.1.347	ssRNA(+)	29903	United Kingdom:England	United Kingdom	Homo sapiens		2020-08-14
MW888100	B.1.1.348	ssRNA(+)	29867	USA: MD	USA	Homo sapiens	oronasopharynx	2020-12-14
MW549822	B.1.1.348	ssRNA(+)	29816	USA: Minnesota	USA	Homo sapiens	oronasopharynx	2020-12-26
MW549825	B.1.1.348	ssRNA(+)	29816	USA: Minnesota	USA	Homo sapiens	oronasopharynx	2020-12-28
OA967353	B.1.1.349	ssRNA(+)	29903	United Kingdom:England	United Kingdom	Homo sapiens		2020-08-04
OA967354	B.1.1.349	ssRNA(+)	29903	United Kingdom:England	United Kingdom	Homo sapiens		2020-08-06
OA967355	B.1.1.349	ssRNA(+)	29903	United Kingdom:England	United Kingdom	Homo sapiens		2020-08-06
OA982854	B.1.1.351	ssRNA(+)	29903	United Kingdom:England	United Kingdom	Homo sapiens		2020-09-10
OA982872	B.1.1.351	ssRNA(+)	29903	United Kingdom:England	United Kingdom	Homo sapiens		2020-09-11
OA999457	B.1.1.351	ssRNA(+)	29903	United Kingdom:England	United Kingdom	Homo sapiens		2020-09-19
MW460572	B.1.1.352	ssRNA(+)	29784	USA: CA	USA	Homo sapiens		2020-12-26
OD952608	B.1.1.353	ssRNA(+)	29903	United Kingdom:England	United Kingdom	Homo sapiens		2021-01-25
OD917808	B.1.1.353	ssRNA(+)	29903	United Kingdom:England	United Kingdom	Homo sapiens		2020-12-14
MW509813	B.1.1.353	ssRNA(+)	29793	Egypt	Egypt	Homo sapiens	oronasopharynx	2021-01-03
OD898657	B.1.1.354	ssRNA(+)	29903	United Kingdom:England	United Kingdom	Homo sapiens		2020-11-15
OD901916	B.1.1.354	ssRNA(+)	29903	United Kingdom:England	United Kingdom	Homo sapiens		2020-11-17
OD920956	B.1.1.354	ssRNA(+)	29903	United Kingdom:England	United Kingdom	Homo sapiens		2020-11-18
OD921340	B.1.1.355	ssRNA(+)	29902	United Kingdom:England	United Kingdom	Homo sapiens		2020-11-17
OD909189	B.1.1.355	ssRNA(+)	29902	United Kingdom:England	United Kingdom	Homo sapiens		2020-12-09
OD909426	B.1.1.355	ssRNA(+)	29902	United Kingdom:England	United Kingdom	Homo sapiens		2020-12-11
MW792828	B.1.1.356	ssRNA(+)	29864	USA: FL	USA	Homo sapiens		2021-02-16
MW763160	B.1.1.356	ssRNA(+)	29726	USA: TX	USA	Homo sapiens	oronasopharynx	2020-06-24
MW738832	B.1.1.356	ssRNA(+)	29725	USA: TX	USA	Homo sapiens	oronasopharynx	2020-06-18
MZ473827	B.1.1.358	ssRNA(+)	29782	USA	USA	Homo sapiens		2020-10-12
MZ473841	B.1.1.358	ssRNA(+)	29782	USA	USA	Homo sapiens		2020-10-13
MW883215	B.1.1.358	ssRNA(+)	29782	USA: New Mexico	USA	Homo sapiens	oronasopharynx	2020-10-15
MW523400	B.1.1.359	ssRNA(+)	29782	Ghana	Ghana	Homo sapiens	oronasopharynx	2020-07-30
MW523414	B.1.1.359	ssRNA(+)	29782	Ghana	Ghana	Homo sapiens	oronasopharynx	2020-08-03
MW598430	B.1.1.359	ssRNA(+)	29903	Ghana	Ghana	Homo sapiens		2020-12-27
OA981508	B.1.1.361	ssRNA(+)	29903	United Kingdom:England	United Kingdom	Homo sapiens		2020-06-04
OA976636	B.1.1.361	ssRNA(+)	29903	United Kingdom:England	United Kingdom	Homo sapiens		2020-06-07
OA975908	B.1.1.361	ssRNA(+)	29903	United Kingdom:England	United Kingdom	Homo sapiens		2020-06-08
MW738819	B.1.1.362	ssRNA(+)	29725	USA: TX	USA	Homo sapiens	oronasopharynx	2020-06-25
MW521715	B.1.1.362	ssRNA(+)	29782	USA: KS	USA	Homo sapiens		2020-07-13
MW035370	B.1.1.362	ssRNA(+)	29782	USA: Wisconsin, Dane county	USA	Homo sapiens	oronasopharynx	2020-08-05
OA976135	B.1.1.363	ssRNA(+)	29903	United Kingdom:England	United Kingdom	Homo sapiens		2020-06-11
OA976141	B.1.1.363	ssRNA(+)	29903	United Kingdom:Wales	United Kingdom	Homo sapiens		2020-06-11
OA980880	B.1.1.363	ssRNA(+)	29903	United Kingdom:Wales	United Kingdom	Homo sapiens		2020-06-13
OA994835	B.1.1.364	ssRNA(+)	29903	United Kingdom:England	United Kingdom	Homo sapiens		2020-09-04
OA972435	B.1.1.364	ssRNA(+)	29903	United Kingdom:England	United Kingdom	Homo sapiens		2020-09-02
OA973156	B.1.1.364	ssRNA(+)	29903	United Kingdom:England	United Kingdom	Homo sapiens		2020-08-31
OA980807	B.1.1.365	ssRNA(+)	29903	United Kingdom:England	United Kingdom	Homo sapiens		2020-06-01
OA980824	B.1.1.365	ssRNA(+)	29903	United Kingdom:England	United Kingdom	Homo sapiens		2020-06-01
OA981157	B.1.1.365	ssRNA(+)	29903	United Kingdom:England	United Kingdom	Homo sapiens		2020-06-02
MW674823	B.1.1.366	ssRNA(+)	29902	Israel	Israel	Homo sapiens		2020-04-09
MW974596	B.1.1.368	ssRNA(+)	29782	USA: Virginia	USA	Homo sapiens	oronasopharynx	2020-11-09
MW974597	B.1.1.368	ssRNA(+)	29782	USA: Virginia	USA	Homo sapiens	oronasopharynx	2020-11-09
MW974340	B.1.1.368	ssRNA(+)	29843	USA	USA	Homo sapiens	oronasopharynx	2020-11-11
OA965001	B.1.1.369	ssRNA(+)	29782	United Kingdom:England	United Kingdom	Homo sapiens		2020-03-12
OA965192	B.1.1.369	ssRNA(+)	29782	United Kingdom:England	United Kingdom	Homo sapiens		2020-03-14
FR996093	B.1.1.369	ssRNA(+)	29848	United Kingdom:England	United Kingdom	Homo sapiens		2020-03-18
FR999329	B.1.1.37	ssRNA(+)	29782	United Kingdom:Northern Ireland	United Kingdom	Homo sapiens		2020-04-12
OA965644	B.1.1.37	ssRNA(+)	29783	United Kingdom:Northern Ireland	United Kingdom	Homo sapiens		2020-04-16
OA965581	B.1.1.37	ssRNA(+)	29782	United Kingdom:Northern Ireland	United Kingdom	Homo sapiens		2020-04-20
OA976190	B.1.1.370	ssRNA(+)	29903	United Kingdom:England	United Kingdom	Homo sapiens		2020-06-08
OA973499	B.1.1.370	ssRNA(+)	29894	United Kingdom:England	United Kingdom	Homo sapiens		2020-06-10
MW747925	B.1.1.370	ssRNA(+)	29713	USA: TX	USA	Homo sapiens	oronasopharynx	2020-06-23
OA982155	B.1.1.371	ssRNA(+)	29903	United Kingdom:England	United Kingdom	Homo sapiens		2020-09-07
OA972132	B.1.1.371	ssRNA(+)	29903	United Kingdom:England	United Kingdom	Homo sapiens		2020-09-07
OA996320	B.1.1.371	ssRNA(+)	29903	United Kingdom:England	United Kingdom	Homo sapiens		2020-10-06
FR996499	B.1.1.372	ssRNA(+)	29812	United Kingdom:England	United Kingdom	Homo sapiens		2020-03-21
OA966230	B.1.1.372	ssRNA(+)	29782	United Kingdom:Scotland	United Kingdom	Homo sapiens		2020-03-23
OA971566	B.1.1.372	ssRNA(+)	29903	United Kingdom:England	United Kingdom	Homo sapiens		2020-03-23
MZ266428	B.1.1.373	ssRNA(+)	29784	Hong Kong	Hong Kong	Homo sapiens		2020-11-24
MZ145293	B.1.1.374	ssRNA(+)	29841	Iraq	Iraq	Homo sapiens	oronasopharynx	2021-02-22
OD907560	B.1.1.374	ssRNA(+)	29903	United Kingdom:England	United Kingdom	Homo sapiens		2020-11-17
OB986801	B.1.1.375	ssRNA(+)	29900	United Kingdom:England	United Kingdom	Homo sapiens		2020-10-21
OD907692	B.1.1.375	ssRNA(+)	29900	United Kingdom:England	United Kingdom	Homo sapiens		2020-11-18
OD908208	B.1.1.375	ssRNA(+)	29900	United Kingdom:England	United Kingdom	Homo sapiens		2020-11-18
MW483286	B.1.1.376	ssRNA(+)	29847	USA: CA, Santa Clara County	USA	Homo sapiens		2020-05-11
MW565547	B.1.1.376	ssRNA(+)	29816	USA: CA, Alameda County	USA	Homo sapiens		2020-05-27
MW565557	B.1.1.376	ssRNA(+)	29844	USA: CA, Alameda County	USA	Homo sapiens		2020-05-27
FR994409	B.1.1.378	ssRNA(+)	29782	United Kingdom:England	United Kingdom	Homo sapiens		2020-04-03
FR994410	B.1.1.378	ssRNA(+)	29812	United Kingdom:England	United Kingdom	Homo sapiens		2020-04-03
OA966437	B.1.1.378	ssRNA(+)	29903	United Kingdom:England	United Kingdom	Homo sapiens		2020-04-27
FR994678	B.1.1.379	ssRNA(+)	29849	United Kingdom:England	United Kingdom	Homo sapiens		2020-04-05
FR990239	B.1.1.379	ssRNA(+)	29782	United Kingdom:England	United Kingdom	Homo sapiens		2020-04-13
OA978773	B.1.1.38	ssRNA(+)	29900	United Kingdom:England	United Kingdom	Homo sapiens		2020-07-16
OA976096	B.1.1.38	ssRNA(+)	29903	United Kingdom:Wales	United Kingdom	Homo sapiens		2020-06-10
MT811489	B.1.1.380	ssRNA(+)	29409	USA: San Diego, California	USA	Homo sapiens	oronasopharynx	2020-06-21
MZ842748	B.1.1.380	ssRNA(+)	29862	USA: CA, Orange County	USA	Homo sapiens		2020-06-23
OA979259	B.1.1.380	ssRNA(+)	29903	United Kingdom:England	United Kingdom	Homo sapiens		2020-06-29
MW030269	B.1.1.381	ssRNA(+)	29520	Peru	Peru	Homo sapiens		2020-05-04
MW490736	B.1.1.389	ssRNA(+)	29813	USA: FL	USA	Homo sapiens		2020-11-04
MZ189604	B.1.1.389	ssRNA(+)	29862	USA	USA	Homo sapiens		2021-01-25
MW715077	B.1.1.389	ssRNA(+)	29851	Spain	Spain	Homo sapiens	oronasopharynx	2021-02-08
OA979261	B.1.1.39	ssRNA(+)	29903	United Kingdom:England	United Kingdom	Homo sapiens		2020-07-15
OA969595	B.1.1.39	ssRNA(+)	29903	United Kingdom:England	United Kingdom	Homo sapiens		2020-08-06
OA968914	B.1.1.39	ssRNA(+)	29903	United Kingdom:Scotland	United Kingdom	Homo sapiens		2020-08-10
FR994951	B.1.1.391	ssRNA(+)	29849	United Kingdom:England	United Kingdom	Homo sapiens		2020-04-06
MW483262	B.1.1.391	ssRNA(+)	29816	USA: CA, Santa Clara County	USA	Homo sapiens		2020-06-23
MZ471597	B.1.1.392	ssRNA(+)	29783	USA	USA	Homo sapiens		2020-11-04
MW406539	B.1.1.392	ssRNA(+)	29791	USA: IN	USA	Homo sapiens		2020-11-06
MW550372	B.1.1.392	ssRNA(+)	29871	USA: IN	USA	Homo sapiens	oronasopharynx	2020-12-30
MW599513	B.1.1.393	ssRNA(+)	29810	USA: Massachusetts	USA	Homo sapiens		2021-01-08
OA964679	B.1.1.395	ssRNA(+)	29782	United Kingdom:England	United Kingdom	Homo sapiens		2020-04-27
OA964788	B.1.1.395	ssRNA(+)	29782	United Kingdom:England	United Kingdom	Homo sapiens		2020-04-30
OA964775	B.1.1.395	ssRNA(+)	29782	United Kingdom:England	United Kingdom	Homo sapiens		2020-05-12
OK426873	B.1.1.397	ssRNA(+)	29782	New Zealand: Canterbury	New Zealand	Homo sapiens		2020-10-22
OD939414	B.1.1.397	ssRNA(+)	29903	United Kingdom:England	United Kingdom	Homo sapiens		2021-01-12
OB995314	B.1.1.397	ssRNA(+)	29893	United Kingdom:England	United Kingdom	Homo sapiens		2020-11-02
OL980404	B.1.1.398	ssRNA(+)	29898	Hong Kong	Hong Kong	Homo sapiens
MW836899	B.1.1.398	ssRNA(+)	29725	USA: TX	USA	Homo sapiens	oronasopharynx	2020-08-06
FR995577	B.1.1.4	ssRNA(+)	29812	United Kingdom:England	United Kingdom	Homo sapiens		2020-03-31
FR995943	B.1.1.4	ssRNA(+)	29812	United Kingdom:England	United Kingdom	Homo sapiens		2020-03-31
FR995320	B.1.1.4	ssRNA(+)	29782	United Kingdom:England	United Kingdom	Homo sapiens		2020-04-03
OL588225	B.1.1.401	ssRNA(+)	29782	Japan	Japan	Homo sapiens		2020-04-16
LC556316	B.1.1.401	ssRNA(+)	29903	Japan	Japan	Homo sapiens
OA966082	B.1.1.402	ssRNA(+)	29783	United Kingdom:England	United Kingdom	Homo sapiens		2020-04-23
FR998093	B.1.1.402	ssRNA(+)	29782	United Kingdom:England	United Kingdom	Homo sapiens		2020-04-27
MZ842460	B.1.1.403	ssRNA(+)	29786	USA: CA	USA	Homo sapiens		2020-09-15
MZ842462	B.1.1.403	ssRNA(+)	29845	USA: CA	USA	Homo sapiens		2020-09-15
MZ842476	B.1.1.403	ssRNA(+)	29847	USA: CA	USA	Homo sapiens		2020-09-15
MW375729	B.1.1.406	ssRNA(+)	29830	Spain	Spain	Homo sapiens		2020-03-25
OA978848	B.1.1.406	ssRNA(+)	29903	United Kingdom:England	United Kingdom	Homo sapiens		2020-07-16
OA969999	B.1.1.406	ssRNA(+)	29903	United Kingdom:Scotland	United Kingdom	Homo sapiens		2020-07-17
MZ702341	B.1.1.407	ssRNA(+)	29714	USA: New York, New York City	USA	Homo sapiens	oronasopharynx	2021-01-14
OA979190	B.1.1.408	ssRNA(+)	29903	United Kingdom:England	United Kingdom	Homo sapiens		2020-07-19
OA969082	B.1.1.408	ssRNA(+)	29903	United Kingdom:England	United Kingdom	Homo sapiens		2020-08-10
OA969946	B.1.1.408	ssRNA(+)	29903	United Kingdom:England	United Kingdom	Homo sapiens		2020-07-19
OA967549	B.1.1.409	ssRNA(+)	29782	United Kingdom:England	United Kingdom	Homo sapiens		2020-03-16
LR877808	B.1.1.409	ssRNA(+)	29778	Netherlands:ZuidHolland	Netherlands	Homo sapiens		2020-03-23
LR877916	B.1.1.409	ssRNA(+)	29775	Netherlands:not collected	Netherlands	Homo sapiens		2020-03-26
FR996493	B.1.1.41	ssRNA(+)	29849	United Kingdom:England	United Kingdom	Homo sapiens		2020-03-21
OA971852	B.1.1.41	ssRNA(+)	29782	United Kingdom:England	United Kingdom	Homo sapiens		2020-03-24
OA971871	B.1.1.41	ssRNA(+)	29782	United Kingdom:England	United Kingdom	Homo sapiens		2020-03-31
OA979424	B.1.1.410	ssRNA(+)	29903	United Kingdom:England	United Kingdom	Homo sapiens		2020-07-18
OA968702	B.1.1.410	ssRNA(+)	29903	United Kingdom:England	United Kingdom	Homo sapiens		2020-08-10
OA980086	B.1.1.411	ssRNA(+)	29903	United Kingdom:England	United Kingdom	Homo sapiens		2020-07-03
MW687367	B.1.1.411	ssRNA(+)	29832	USA: Massachusetts	USA	Homo sapiens		2021-01-04
MW599577	B.1.1.411	ssRNA(+)	29813	USA: Massachusetts	USA	Homo sapiens		2021-01-08
OA982137	B.1.1.413	ssRNA(+)	29897	United Kingdom:England	United Kingdom	Homo sapiens		2020-09-07
OB981896	B.1.1.413	ssRNA(+)	29897	United Kingdom:England	United Kingdom	Homo sapiens		2020-10-17
OD899079	B.1.1.413	ssRNA(+)	29897	United Kingdom:England	United Kingdom	Homo sapiens		2020-11-13
MT451093	B.1.1.416	ssRNA(+)	29798	Australia: Victoria	Australia	Homo sapiens		2020-03-19
MZ202493	B.1.1.416	ssRNA(+)	29837	USA	USA	Homo sapiens	oronasopharynx	2020-07-01
MW389618	B.1.1.416	ssRNA(+)	29851	USA: California	USA	Homo sapiens		2020-07-03
OD920575	B.1.1.417	ssRNA(+)	29903	United Kingdom:England	United Kingdom	Homo sapiens		2020-12-06
MW922994	B.1.1.418	ssRNA(+)	29814	USA: CA, Alameda County	USA	Homo sapiens		2020-10-06
MW973973	B.1.1.418	ssRNA(+)	29815	USA	USA	Homo sapiens	oronasopharynx	2020-11-04
MW565773	B.1.1.418	ssRNA(+)	29815	USA: CA, Santa Clara County	USA	Homo sapiens		2020-11-04
OA965519	B.1.1.419	ssRNA(+)	29782	United Kingdom:England	United Kingdom	Homo sapiens		2020-03-14
OA965006	B.1.1.419	ssRNA(+)	29783	United Kingdom:England	United Kingdom	Homo sapiens		2020-03-19
OA965207	B.1.1.419	ssRNA(+)	29782	United Kingdom:England	United Kingdom	Homo sapiens		2020-03-21
OB987651	B.1.1.420	ssRNA(+)	29888	United Kingdom:England	United Kingdom	Homo sapiens		2020-10-21
MZ702274	B.1.1.420	ssRNA(+)	29714	USA: New York, New York City	USA	Homo sapiens	oronasopharynx	2020-12-08
OL473514	B.1.1.420	ssRNA(+)	29717	USA	USA	Homo sapiens	oronasopharynx	2020-12-30
OA973837	B.1.1.421	ssRNA(+)	29903	United Kingdom:England	United Kingdom	Homo sapiens		2020-07-02
OA979180	B.1.1.421	ssRNA(+)	29903	United Kingdom:England	United Kingdom	Homo sapiens		2020-07-21
OA978732	B.1.1.421	ssRNA(+)	29903	United Kingdom:England	United Kingdom	Homo sapiens		2020-07-22
MW483447	B.1.1.423	ssRNA(+)	29792	USA: CA, San Francisco County	USA	Homo sapiens		2020-06-13
MW483448	B.1.1.423	ssRNA(+)	29813	USA: CA, San Francisco County	USA	Homo sapiens		2020-07-01
MW565428	B.1.1.423	ssRNA(+)	29804	USA: CA, Alameda County	USA	Homo sapiens		2020-07-09
MW332235	B.1.1.424	ssRNA(+)	29663	Russia: Saratov	Russia	Homo sapiens	oronasopharynx	2020-05-02
OB987213	B.1.1.425	ssRNA(+)	29903	United Kingdom:England	United Kingdom	Homo sapiens		2020-10-21
OA974464	B.1.1.425	ssRNA(+)	29903	United Kingdom:England	United Kingdom	Homo sapiens		2020-08-25
OA972483	B.1.1.425	ssRNA(+)	29903	United Kingdom:England	United Kingdom	Homo sapiens		2020-08-30
MW815745	B.1.1.426	ssRNA(+)	29725	USA: TX	USA	Homo sapiens	oronasopharynx	2020-06-18
MW815746	B.1.1.426	ssRNA(+)	29725	USA: TX	USA	Homo sapiens	oronasopharynx	2020-06-18
MW816566	B.1.1.426	ssRNA(+)	29725	USA: TX	USA	Homo sapiens	oronasopharynx	2020-06-18
MW666386	B.1.1.428	ssRNA(+)	29782	USA: Nevada	USA	Homo sapiens	oronasopharynx	2021-02-01
MW667307	B.1.1.428	ssRNA(+)	29782	USA: Nevada	USA	Homo sapiens	oronasopharynx	2021-01-27
FR998548	B.1.1.43	ssRNA(+)	29782	United Kingdom:Scotland	United Kingdom	Homo sapiens		2020-03-26
OA966304	B.1.1.43	ssRNA(+)	29782	United Kingdom:Scotland	United Kingdom	Homo sapiens		2020-03-28
OA971535	B.1.1.43	ssRNA(+)	29903	United Kingdom:England	United Kingdom	Homo sapiens		2020-03-28
MT972175	B.1.1.431	ssRNA(+)	29814	Australia: Victoria	Australia	Homo sapiens		2020-06-23
MW483291	B.1.1.432	ssRNA(+)	29797	USA: CA, Santa Clara County	USA	Homo sapiens		2020-05-14
OK436506	B.1.1.432	ssRNA(+)	29852	Mexico	Mexico	Homo sapiens		2020-05-19
OK549097	B.1.1.432	ssRNA(+)	29598	USA: California,San Diego	USA	Homo sapiens	oronasopharynx	2020-07-12
OA975281	B.1.1.433	ssRNA(+)	29903	United Kingdom:England	United Kingdom	Homo sapiens		2020-08-18
OA975285	B.1.1.433	ssRNA(+)	29903	United Kingdom:England	United Kingdom	Homo sapiens		2020-08-18
OA975498	B.1.1.433	ssRNA(+)	29903	United Kingdom:England	United Kingdom	Homo sapiens		2020-08-18
MW578263	B.1.1.434	ssRNA(+)	29882	USA: NJ	USA	Homo sapiens		2020-06-24
MW495986	B.1.1.434	ssRNA(+)	29633	USA: New Jersey	USA	Homo sapiens		2020-06-24
OA993039	B.1.1.434	ssRNA(+)	29903	United Kingdom:England	United Kingdom	Homo sapiens		2020-08-22
MW907409	B.1.1.437	ssRNA(+)	29803	USA	USA	Homo sapiens	oronasopharynx	2020-06-20
MW990328	B.1.1.437	ssRNA(+)	29883	USA	USA	Homo sapiens	oronasopharynx	2020-07-06
MW521761	B.1.1.437	ssRNA(+)	29782	USA: OH	USA	Homo sapiens		2020-07-07
OA981188	B.1.1.44	ssRNA(+)	29903	United Kingdom:England	United Kingdom	Homo sapiens		2020-06-01
OA976028	B.1.1.44	ssRNA(+)	29903	United Kingdom:England	United Kingdom	Homo sapiens		2020-06-08
OA977575	B.1.1.44	ssRNA(+)	29903	United Kingdom:England	United Kingdom	Homo sapiens		2020-06-09
MW435666	B.1.1.440	ssRNA(+)	29812	USA: TX	USA	Homo sapiens	oronasopharynx	2020-06-18
MZ245562	B.1.1.440	ssRNA(+)	29837	USA	USA	Homo sapiens	oronasopharynx	2020-06-30
MZ779323	B.1.1.440	ssRNA(+)	29867	USA: MP	USA	Homo sapiens		2020-07-02
MW490809	B.1.1.441	ssRNA(+)	29813	USA: FL	USA	Homo sapiens		2020-07-07
MW490812	B.1.1.441	ssRNA(+)	29847	USA: FL	USA	Homo sapiens		2020-07-07
MW566810	B.1.1.441	ssRNA(+)	29759	USA: FL	USA	Homo sapiens		2020-09-16
LR994839	B.1.1.446	ssRNA(+)	29896	Sweden	Sweden	Homo sapiens
OA971433	B.1.1.447	ssRNA(+)	29903	United Kingdom:England	United Kingdom	Homo sapiens		2020-05-30
MW067763	B.1.1.447	ssRNA(+)	29902	USA: Virginia	USA	Homo sapiens
MW067764	B.1.1.447	ssRNA(+)	29862	USA: Virginia	USA	Homo sapiens
OA981535	B.1.1.45	ssRNA(+)	29903	United Kingdom:England	United Kingdom	Homo sapiens		2020-05-22
OA981299	B.1.1.45	ssRNA(+)	29903	United Kingdom:England	United Kingdom	Homo sapiens		2020-05-27
OA981302	B.1.1.45	ssRNA(+)	29903	United Kingdom:England	United Kingdom	Homo sapiens		2020-05-27
MW973945	B.1.1.450	ssRNA(+)	29851	USA	USA	Homo sapiens	oronasopharynx	2020-11-20
MW973980	B.1.1.450	ssRNA(+)	29848	USA	USA	Homo sapiens	oronasopharynx	2020-11-20
MW974249	B.1.1.450	ssRNA(+)	29851	USA	USA	Homo sapiens	oronasopharynx	2020-11-20
MW341874	B.1.1.453	ssRNA(+)	29782	USA: Wisconsin, Milwaukee county	USA	Homo sapiens	oronasopharynx	2020-09-10
MW246592	B.1.1.453	ssRNA(+)	29816	USA: Minnesota	USA	Homo sapiens		2020-10-10
MW246593	B.1.1.453	ssRNA(+)	29826	USA: Minnesota	USA	Homo sapiens		2020-10-13
MW077478	B.1.1.46	ssRNA(+)	29843	USA: Washington,King County	USA	Homo sapiens		2020-09-08
OA994071	B.1.1.46	ssRNA(+)	29902	United Kingdom:England	United Kingdom	Homo sapiens		2020-09-23
HG997183	B.1.1.46	ssRNA(+)	29899	United Kingdom:Oxford	United Kingdom	Homo sapiens		2020-11-25
MW870819	B.1.1.462	ssRNA(+)	29714	USA: Florida	USA	Homo sapiens	oronasopharynx	2021-03-16
MW483300	B.1.1.463	ssRNA(+)	29854	USA: CA, Santa Clara County	USA	Homo sapiens		2020-05-11
MW483281	B.1.1.463	ssRNA(+)	29816	USA: CA, Santa Clara County	USA	Homo sapiens		2020-05-16
MW483282	B.1.1.463	ssRNA(+)	29819	USA: CA, Santa Clara County	USA	Homo sapiens		2020-06-21
MZ363522	B.1.1.464	ssRNA(+)	29875	USA: Wisconsin, Milwaukee	USA	Homo sapiens	oronasopharynx	2020-04-01
MZ363546	B.1.1.464	ssRNA(+)	29839	USA: Wisconsin, Milwaukee	USA	Homo sapiens	oronasopharynx	2020-04-01
MZ363547	B.1.1.464	ssRNA(+)	29831	USA: Wisconsin, Milwaukee	USA	Homo sapiens	oronasopharynx	2020-04-01
MW974587	B.1.1.467	ssRNA(+)	29782	USA: Virginia	USA	Homo sapiens	oronasopharynx	2020-10-25
MW446828	B.1.1.467	ssRNA(+)	29824	USA: MD	USA	Homo sapiens	oronasopharynx	2020-12-01
MW929658	B.1.1.467	ssRNA(+)	29782	USA: Alabama, Shelby County	USA	Homo sapiens	oronasopharynx	2020-12-04
OA978676	B.1.1.47	ssRNA(+)	29903	United Kingdom:England	United Kingdom	Homo sapiens		2020-07-17
OA978928	B.1.1.47	ssRNA(+)	29903	United Kingdom:England	United Kingdom	Homo sapiens		2020-07-17
OA979715	B.1.1.47	ssRNA(+)	29903	United Kingdom:England	United Kingdom	Homo sapiens		2020-07-17
OL588219	B.1.1.48	ssRNA(+)	29782	Japan	Japan	Homo sapiens		2020-04-16
OL588224	B.1.1.48	ssRNA(+)	29782	Japan	Japan	Homo sapiens		2020-04-16
OL588226	B.1.1.48	ssRNA(+)	29782	Japan	Japan	Homo sapiens		2020-04-19
MZ906092	B.1.1.480	ssRNA(+)	29786	USA: Arizona	USA	Homo sapiens		2020-04-20
MZ906147	B.1.1.480	ssRNA(+)	29899	USA: Arizona	USA	Homo sapiens		2020-04-27
MZ906191	B.1.1.480	ssRNA(+)	29813	USA: Arizona	USA	Homo sapiens		2020-04-27
FR998407	B.1.1.482	ssRNA(+)	29783	United Kingdom:Scotland	United Kingdom	Homo sapiens		2020-03-24
BS001101	B.1.1.482	ssRNA(+)	29782	Japan:Hokkaido	Japan	Homo sapiens	oronasopharynx	2020-04-18
BS001103	B.1.1.482	ssRNA(+)	29782	Japan:Hokkaido	Japan	Homo sapiens	oronasopharynx	2020-04-23
MT890210	B.1.1.485	ssRNA(+)	29825	Ghana	Ghana	Homo sapiens	oronasopharynx	2020-05-23
MW523386	B.1.1.485	ssRNA(+)	29782	Ghana	Ghana	Homo sapiens	oronasopharynx	2020-07-20
MW523391	B.1.1.485	ssRNA(+)	29782	Ghana	Ghana	Homo sapiens	oronasopharynx	2020-07-20
MW495883	B.1.1.486	ssRNA(+)	29794	USA: Connecticut	USA	Homo sapiens		2020-11-15
MW454730	B.1.1.486	ssRNA(+)	29877	USA: Massachusetts	USA	Homo sapiens		2020-11-17
MW863816	B.1.1.486	ssRNA(+)	29860	USA	USA	Homo sapiens	oronasopharynx	2020-12-02
MT994707	B.1.1.487	ssRNA(+)	29777	Nigeria	Nigeria	Homo sapiens		2020-03-22
OB986078	B.1.1.487	ssRNA(+)	29903	United Kingdom:England	United Kingdom	Homo sapiens		2020-10-19
OB987655	B.1.1.487	ssRNA(+)	29903	United Kingdom:England	United Kingdom	Homo sapiens		2020-10-20
OA964202	B.1.1.5	ssRNA(+)	29903	United Kingdom:Scotland	United Kingdom	Homo sapiens		2020-04-17
FR996186	B.1.1.5	ssRNA(+)	29846	United Kingdom:England	United Kingdom	Homo sapiens		2020-03-29
MW228070	B.1.1.50	ssRNA(+)	29871	Israel	Israel	Homo sapiens		2020-06-14
MW194121	B.1.1.50	ssRNA(+)	29925	Israel	Israel	Homo sapiens		2020-06-14
OA978889	B.1.1.50	ssRNA(+)	29903	United Kingdom:England	United Kingdom	Homo sapiens		2020-07-14
OU805101	B.1.1.500	ssRNA(+)	29865	United Kingdom:England	United Kingdom	Homo sapiens		2020-09-22
OA999180	B.1.1.500	ssRNA(+)	29903	United Kingdom:Scotland	United Kingdom	Homo sapiens		2020-09-22
OB984801	B.1.1.500	ssRNA(+)	29900	United Kingdom:England	United Kingdom	Homo sapiens		2020-10-10
OA971631	B.1.1.51	ssRNA(+)	29903	United Kingdom:England	United Kingdom	Homo sapiens		2020-03-30
OA971868	B.1.1.51	ssRNA(+)	29782	United Kingdom:England	United Kingdom	Homo sapiens		2020-03-30
OA971621	B.1.1.51	ssRNA(+)	29903	United Kingdom:England	United Kingdom	Homo sapiens		2020-03-31
MW035497	B.1.1.512	ssRNA(+)	29782	USA: Wisconsin, Dane county	USA	Homo sapiens	oronasopharynx	2020-08-26
MW522383	B.1.1.512	ssRNA(+)	29782	USA: CO	USA	Homo sapiens		2020-10-28
MW973867	B.1.1.512	ssRNA(+)	29815	USA	USA	Homo sapiens	oronasopharynx	2020-11-14
MZ202472	B.1.1.514	ssRNA(+)	29828	USA	USA	Homo sapiens	oronasopharynx	2020-05-02
MW483258	B.1.1.514	ssRNA(+)	29847	USA: CA, Santa Clara County	USA	Homo sapiens		2020-06-21
MW565571	B.1.1.514	ssRNA(+)	29815	USA: CA, Alameda County	USA	Homo sapiens		2020-06-23
MW550170	B.1.1.517	ssRNA(+)	29782	USA: CA	USA	Homo sapiens		2021-01-08
MW550135	B.1.1.517	ssRNA(+)	29782	USA: CA	USA	Homo sapiens		2021-01-09
MW586772	B.1.1.517	ssRNA(+)	29782	USA: CA	USA	Homo sapiens		2021-01-15
MZ544892	B.1.1.518	ssRNA(+)	29823	USA: AZ, Yuma	USA	Homo sapiens	oronasopharynx	2020-10-29
MZ622271	B.1.1.518	ssRNA(+)	29903	USA: California,Los Angeles County	USA	Homo sapiens	oronasopharynx	2020-11-02
MZ543424	B.1.1.518	ssRNA(+)	29898	USA: AZ, Yuma	USA	Homo sapiens	oronasopharynx	2020-11-02
OL790171	B.1.1.519	ssRNA(+)	29835	Mexico	Mexico	Homo sapiens	oronasopharynx	2020-08-28
OL790172	B.1.1.519	ssRNA(+)	29832	Mexico	Mexico	Homo sapiens	oronasopharynx	2020-08-28
OL790173	B.1.1.519	ssRNA(+)	29834	Mexico	Mexico	Homo sapiens	oronasopharynx	2020-08-28
OA972694	B.1.1.521	ssRNA(+)	29903	United Kingdom:England	United Kingdom	Homo sapiens		2020-08-31
OA983299	B.1.1.521	ssRNA(+)	29894	United Kingdom:England	United Kingdom	Homo sapiens		2020-09-09
OA981808	B.1.1.521	ssRNA(+)	29903	United Kingdom:England	United Kingdom	Homo sapiens		2020-09-16
LR878026	B.1.1.523	ssRNA(+)	28645	Netherlands:not collected	Netherlands	Homo sapiens		2020-03-31
OU385091	B.1.1.523	ssRNA(+)	29904	United Kingdom:England	United Kingdom	Homo sapiens		2021-02-12
OU385251	B.1.1.523	ssRNA(+)	29903	United Kingdom:England	United Kingdom	Homo sapiens		2021-02-28
MZ680663	B.1.1.525	ssRNA(+)	29770	USA: New York, New York City	USA	Homo sapiens	oronasopharynx	2021-02-18
MZ680665	B.1.1.525	ssRNA(+)	29770	USA: New York, New York City	USA	Homo sapiens	oronasopharynx	2021-02-16
MZ084327	B.1.1.525	ssRNA(+)	29888	USA: New Jersey	USA	Homo sapiens		2021-04-06
MZ471932	B.1.1.526	ssRNA(+)	29809	USA	USA	Homo sapiens		2021-01-15
OK435996	B.1.1.526	ssRNA(+)	29798	Mexico	Mexico	Homo sapiens		2021-02-22
OK433597	B.1.1.526	ssRNA(+)	29782	New Zealand	New Zealand	Homo sapiens		2021-05-01
MZ579365	B.1.1.528	ssRNA(+)	29885	USA: Pennsylvania, Havertown	USA	Homo sapiens		2021-04-14
OL920485	B.1.1.529	ssRNA(+)	29770	USA	USA	Homo sapiens		2021-11-29
OL901854	B.1.1.529	ssRNA(+)	29770	USA	USA	Homo sapiens		2021-12-01
OL902308	B.1.1.529	ssRNA(+)	29699	USA	USA	Homo sapiens		2021-12-01
OD912375	B.1.1.54	ssRNA(+)	29903	United Kingdom:England	United Kingdom	Homo sapiens		2020-10-19
OA977208	B.1.1.54	ssRNA(+)	29903	United Kingdom:England	United Kingdom	Homo sapiens		2020-06-17
OA967421	B.1.1.54	ssRNA(+)	29903	United Kingdom:England	United Kingdom	Homo sapiens		2020-04-07
OA981133	B.1.1.55	ssRNA(+)	29903	United Kingdom:England	United Kingdom	Homo sapiens		2020-06-02
OA977719	B.1.1.55	ssRNA(+)	29903	United Kingdom:England	United Kingdom	Homo sapiens		2020-06-07
OA977723	B.1.1.55	ssRNA(+)	29903	United Kingdom:England	United Kingdom	Homo sapiens		2020-06-07
OL980045	B.1.1.56	ssRNA(+)	29903	Hong Kong	Hong Kong	Homo sapiens
LR878227	B.1.1.56	ssRNA(+)	29786	Netherlands:Limburg	Netherlands	Homo sapiens		2020-03-03
OU793285	B.1.1.58	ssRNA(+)	29903	United Kingdom:England	United Kingdom	Homo sapiens		2020-09-28
OA972159	B.1.1.58	ssRNA(+)	29903	United Kingdom:England	United Kingdom	Homo sapiens		2020-09-07
OA973570	B.1.1.58	ssRNA(+)	29903	United Kingdom:England	United Kingdom	Homo sapiens		2020-09-01
OA990840	B.1.1.59	ssRNA(+)	29903	United Kingdom:England	United Kingdom	Homo sapiens		2020-06-02
OA981150	B.1.1.59	ssRNA(+)	29903	United Kingdom:Wales	United Kingdom	Homo sapiens		2020-06-02
OA981501	B.1.1.59	ssRNA(+)	29903	United Kingdom:England	United Kingdom	Homo sapiens		2020-06-05
MT276326	B.1.1.61	ssRNA(+)	29882	USA: GA	USA	Homo sapiens	oronasopharynx	2020-02-29
MT276327	B.1.1.61	ssRNA(+)	29882	USA: GA	USA	Homo sapiens	oronasopharynx	2020-02-29
MW191197	B.1.1.61	ssRNA(+)	29782	USA: CA	USA	Homo sapiens		2020-03-13
MT919769	B.1.1.63	ssRNA(+)	29815	Philippines: NCR, Quezon City	Philippines	Homo sapiens	oronasopharynx	2020-06-25
MT919771	B.1.1.63	ssRNA(+)	29813	Philippines: NCR, Taguig City	Philippines	Homo sapiens	oronasopharynx	2020-06-29
MT919773	B.1.1.63	ssRNA(+)	29815	Philippines: NCR, Pasay City	Philippines	Homo sapiens	oronasopharynx	2020-06-29
MW190376	B.1.1.67	ssRNA(+)	29782	USA: FL	USA	Homo sapiens		2020-03-18
MT873456	B.1.1.67	ssRNA(+)	29898	USA: Massachusetts	USA	Homo sapiens	oronasopharynx	2020-04-14
OA976637	B.1.1.67	ssRNA(+)	29903	United Kingdom:England	United Kingdom	Homo sapiens		2020-06-07
OK244698	B.1.1.7	ssRNA(+)	29884	USA	USA	Homo sapiens		2020-01-14
MZ047082	B.1.1.7	ssRNA(+)	29884	Poland	Poland	Homo sapiens		2020-03-15
MZ047085	B.1.1.7	ssRNA(+)	29885	Poland	Poland	Homo sapiens		2020-03-15
MW485932	B.1.1.70	ssRNA(+)	29782	Serbia: Vranje	Serbia	Homo sapiens		2020-04-01
MW548724	B.1.1.70	ssRNA(+)	29782	Serbia: Vranje	Serbia	Homo sapiens		2020-04-02
MW548725	B.1.1.70	ssRNA(+)	29782	Serbia: Leskovac	Serbia	Homo sapiens		2020-04-02
OA964938	B.1.1.71	ssRNA(+)	29782	United Kingdom:England	United Kingdom	Homo sapiens		2020-03-10
MT450944	B.1.1.71	ssRNA(+)	29813	Australia: Victoria	Australia	Homo sapiens		2020-03-10
LR878177	B.1.1.71	ssRNA(+)	29774	Netherlands:not collected	Netherlands	Homo sapiens		2020-03-16
OA966017	B.1.1.74	ssRNA(+)	29779	United Kingdom:Northern Ireland	United Kingdom	Homo sapiens		2020-04-20
OA963994	B.1.1.74	ssRNA(+)	29779	United Kingdom:Northern Ireland	United Kingdom	Homo sapiens		2020-04-22
MZ832774	B.1.1.74	ssRNA(+)	29782	USA	USA	Homo sapiens		2020-06-30
MT451101	B.1.1.75	ssRNA(+)	29798	Australia: Victoria	Australia	Homo sapiens		2020-03-19
MZ331922	B.1.1.75	ssRNA(+)	29783	New Zealand	New Zealand	Homo sapiens		2020-03-21
MZ332029	B.1.1.75	ssRNA(+)	29783	New Zealand	New Zealand	Homo sapiens		2020-03-27
MW286558	B.1.1.77	ssRNA(+)	29823	USA: FL	USA	Homo sapiens		2020-05-28
MW023418	B.1.1.77	ssRNA(+)	29865	USA: FL	USA	Homo sapiens		2020-05-28
MW286559	B.1.1.77	ssRNA(+)	29857	USA: FL	USA	Homo sapiens		2020-05-29
MW190680	B.1.1.8	ssRNA(+)	29782	USA: NY	USA	Homo sapiens		2020-03-15
MW190694	B.1.1.8	ssRNA(+)	29782	USA: NY	USA	Homo sapiens		2020-03-15
MZ040128	B.1.1.8	ssRNA(+)	29782	Gambia	Gambia	Homo sapiens		2020-03-17
FR995054	B.1.1.83	ssRNA(+)	29782	United Kingdom:Northern Ireland	United Kingdom	Homo sapiens		2020-03-27
HG996833	B.1.1.83	ssRNA(+)	29903	United Kingdom:Oxford	United Kingdom	Homo sapiens		2020-04-01
FR999267	B.1.1.83	ssRNA(+)	29782	United Kingdom:Northern Ireland	United Kingdom	Homo sapiens		2020-04-06
OA981549	B.1.1.86	ssRNA(+)	29903	United Kingdom:England	United Kingdom	Homo sapiens		2020-05-22
OA981174	B.1.1.86	ssRNA(+)	29903	United Kingdom:England	United Kingdom	Homo sapiens		2020-06-02
OA981180	B.1.1.86	ssRNA(+)	29903	United Kingdom:England	United Kingdom	Homo sapiens		2020-06-02
OU808267	B.1.1.88	ssRNA(+)	29866	United Kingdom:England	United Kingdom	Homo sapiens		2020-04-28
OA965536	B.1.1.89	ssRNA(+)	29782	United Kingdom:England	United Kingdom	Homo sapiens		2020-03-21
MT451149	B.1.1.89	ssRNA(+)	29808	Australia: Victoria	Australia	Homo sapiens		2020-03-21
OA967203	B.1.1.89	ssRNA(+)	29903	United Kingdom:England	United Kingdom	Homo sapiens		2020-03-23
LR994804	B.1.1.90	ssRNA(+)	29903	Sweden	Sweden	Homo sapiens
LR994888	B.1.1.90	ssRNA(+)	29903	Sweden	Sweden	Homo sapiens
LR995122	B.1.1.90	ssRNA(+)	29903	Sweden	Sweden	Homo sapiens
OA977717	B.1.1.92	ssRNA(+)	29903	United Kingdom:England	United Kingdom	Homo sapiens		2020-06-07
OA977726	B.1.1.92	ssRNA(+)	29903	United Kingdom:England	United Kingdom	Homo sapiens		2020-06-07
OA977605	B.1.1.92	ssRNA(+)	29903	United Kingdom:England	United Kingdom	Homo sapiens		2020-06-09
MT811530	B.1.1.93	ssRNA(+)	29409	USA: San Diego, California	USA	Homo sapiens	oronasopharynx	2020-06-17
OK547910	B.1.1.93	ssRNA(+)	29586	USA: California,San Diego	USA	Homo sapiens	oronasopharynx	2020-06-20
OK546841	B.1.1.93	ssRNA(+)	29860	USA: California,San Diego	USA	Homo sapiens	oronasopharynx	2020-07-06
OA975379	B.1.1.95	ssRNA(+)	29903	United Kingdom:England	United Kingdom	Homo sapiens		2020-06-12
OA975672	B.1.1.95	ssRNA(+)	29903	United Kingdom:England	United Kingdom	Homo sapiens		2020-06-12
OA980519	B.1.1.95	ssRNA(+)	29903	United Kingdom:England	United Kingdom	Homo sapiens		2020-06-14
OA993850	B.1.1.97	ssRNA(+)	29903	United Kingdom:England	United Kingdom	Homo sapiens		2020-05-06
OA993871	B.1.1.97	ssRNA(+)	29903	United Kingdom:England	United Kingdom	Homo sapiens		2020-05-06
OA976884	B.1.1.97	ssRNA(+)	29900	United Kingdom:England	United Kingdom	Homo sapiens		2020-06-15
MZ906026	B.1.1.98	ssRNA(+)	29855	USA: Arizona	USA	Homo sapiens		2020-04-19
MZ906039	B.1.1.98	ssRNA(+)	29853	USA: Arizona	USA	Homo sapiens		2020-04-20
MZ906076	B.1.1.98	ssRNA(+)	29821	USA: Arizona	USA	Homo sapiens		2020-04-20
OL817238	B.1.103	ssRNA(+)	29811	USA: Michigan	USA	Homo sapiens	swab	2020-04-09
OL756860	B.1.103	ssRNA(+)	29812	USA: Michigan	USA	Homo sapiens	swab	2020-04-17
OL756972	B.1.103	ssRNA(+)	29821	USA: Michigan	USA	Homo sapiens	swab	2020-04-21
MW064727	B.1.104	ssRNA(+)	29782	USA: GA	USA	Homo sapiens		2020-03-17
FR996491	B.1.104	ssRNA(+)	29782	United Kingdom:England	United Kingdom	Homo sapiens		2020-03-21
FR996515	B.1.104	ssRNA(+)	29849	United Kingdom:England	United Kingdom	Homo sapiens		2020-03-22
OU806801	B.1.105	ssRNA(+)	29872	United Kingdom:England	United Kingdom	Homo sapiens		2020-03-06
FR996305	B.1.105	ssRNA(+)	29849	United Kingdom:England	United Kingdom	Homo sapiens		2020-03-22
FR995878	B.1.105	ssRNA(+)	29782	United Kingdom:England	United Kingdom	Homo sapiens		2020-03-23
MW241350	B.1.106	ssRNA(+)	29892	USA: Utah	USA	Homo sapiens		2020-05-13
MW206072	B.1.106	ssRNA(+)	29782	USA	USA	Homo sapiens		2020-05-18
MW206068	B.1.106	ssRNA(+)	29782	USA	USA	Homo sapiens		2020-05-21
MW493854	B.1.108	ssRNA(+)	29887	USA	USA	Homo sapiens	oronasopharynx	2020-03-15
MW493855	B.1.108	ssRNA(+)	29903	USA	USA	Homo sapiens	oronasopharynx	2020-03-15
MW494306	B.1.108	ssRNA(+)	29887	USA	USA	Homo sapiens	oronasopharynx	2020-03-15
MT325565	B.1.110	ssRNA(+)	29882	USA: FL	USA	Homo sapiens	lung, oronasopharynx	2020-03-02
MT325564	B.1.110	ssRNA(+)	29882	USA: FL	USA	Homo sapiens	oronasopharynx	2020-03-06
MT614517	B.1.110	ssRNA(+)	29782	USA: UT	USA	Homo sapiens		2020-03-12
MW365225	B.1.110.1	ssRNA(+)	29724	Chile	Chile	Homo sapiens	oronasopharynx	2020-03-18
MT429191	B.1.110.1	ssRNA(+)	29782	USA: Wisconsin	USA	Homo sapiens	oronasopharynx	2020-04-06
OA971769	B.1.110.2	ssRNA(+)	29782	United Kingdom:England	United Kingdom	Homo sapiens		2020-04-03
OA971811	B.1.110.2	ssRNA(+)	29782	United Kingdom:England	United Kingdom	Homo sapiens		2020-04-04
OA971835	B.1.110.2	ssRNA(+)	29782	United Kingdom:England	United Kingdom	Homo sapiens		2020-04-05
MW422117	B.1.110.3	ssRNA(+)	29903	Pakistan: Federal Capital	Pakistan	Homo sapiens	oronasopharynx	2020-03-16
MW064327	B.1.110.3	ssRNA(+)	29782	USA: FL	USA	Homo sapiens		2020-03-19
MT834622	B.1.110.3	ssRNA(+)	29848	USA: FL	USA	Homo sapiens		2020-03-20
MT325577	B.1.111	ssRNA(+)	29882	USA: IL	USA	Homo sapiens	oronasopharynx	2020-03-07
MW065007	B.1.111	ssRNA(+)	29782	USA: CA	USA	Homo sapiens		2020-03-17
MT670021	B.1.111	ssRNA(+)	29782	Chile	Chile	Homo sapiens	oronasopharynx	2020-03-21
MW290969	B.1.112	ssRNA(+)	29878	USA	USA	Homo sapiens		2020-04-06
MW290948	B.1.112	ssRNA(+)	29865	USA	USA	Homo sapiens		2020-04-09
MT536956	B.1.112	ssRNA(+)	29900	USA	USA	Homo sapiens		2020-04-13
MT635392	B.1.113	ssRNA(+)	29800	India: Gujarat, Vadodara	India	Homo sapiens		2020-06-03
MT664807	B.1.113	ssRNA(+)	29796	India: Savli	India	Homo sapiens		2020-06-05
MT664808	B.1.113	ssRNA(+)	29796	India: Savli	India	Homo sapiens		2020-06-05
MW674852	B.1.115	ssRNA(+)	29903	Israel	Israel	Homo sapiens		2020-04-11
OA978808	B.1.115	ssRNA(+)	29903	United Kingdom:England	United Kingdom	Homo sapiens		2020-07-15
OA978816	B.1.115	ssRNA(+)	29903	United Kingdom:England	United Kingdom	Homo sapiens		2020-07-15
MW349100	B.1.116	ssRNA(+)	29822	USA: Minnesota	USA	Homo sapiens		2020-03-29
MT967951	B.1.116	ssRNA(+)	29882	USA	USA	Homo sapiens	oronasopharynx	2020-05-14
FR998895	B.1.117	ssRNA(+)	29782	United Kingdom:England	United Kingdom	Homo sapiens		2020-04-01
FR998627	B.1.117	ssRNA(+)	29782	United Kingdom:England	United Kingdom	Homo sapiens		2020-04-01
FR995355	B.1.117	ssRNA(+)	29812	United Kingdom:England	United Kingdom	Homo sapiens		2020-04-04
OL756156	B.1.119	ssRNA(+)	29844	USA: Michigan	USA	Homo sapiens	swab	2020-03-12
MT439237	B.1.119	ssRNA(+)	29844	USA: MI	USA	Homo sapiens	swab	2020-03-12
MT806789	B.1.119	ssRNA(+)	29782	USA: MI	USA	Homo sapiens		2020-03-14
MW539907	B.1.12	ssRNA(+)	29842	USA	USA	Homo sapiens	oronasopharynx	2020-04-09
OA966605	B.1.12	ssRNA(+)	29903	United Kingdom:England	United Kingdom	Homo sapiens		2020-04-11
OA966620	B.1.12	ssRNA(+)	29903	United Kingdom:England	United Kingdom	Homo sapiens		2020-04-11
MT632903	B.1.124	ssRNA(+)	29871	USA: Washington,Yakima County	USA	Homo sapiens		2020-03-26
MT632871	B.1.124	ssRNA(+)	29868	USA: Washington,Yakima County	USA	Homo sapiens		2020-03-30
MT641547	B.1.124	ssRNA(+)	29855	USA: Washington,Yakima County	USA	Homo sapiens		2020-04-14
OL756959	B.1.126	ssRNA(+)	29812	USA: Michigan	USA	Homo sapiens	swab	2020-05-11
OL756958	B.1.126	ssRNA(+)	29815	USA: Michigan	USA	Homo sapiens	swab	2020-05-12
OL757015	B.1.126	ssRNA(+)	29792	USA: Michigan	USA	Homo sapiens	swab	2020-05-14
LR883407	B.1.128	ssRNA(+)	29782	Netherlands:not collected	Netherlands	Homo sapiens		2020-04-28
OA967173	B.1.13	ssRNA(+)	29902	United Kingdom:England	United Kingdom	Homo sapiens		2020-03-12
OA967189	B.1.13	ssRNA(+)	29903	United Kingdom:England	United Kingdom	Homo sapiens		2020-03-12
FR996844	B.1.13	ssRNA(+)	29782	United Kingdom:England	United Kingdom	Homo sapiens		2020-03-13
OA984024	B.1.131	ssRNA(+)	29903	United Kingdom:Scotland	United Kingdom	Homo sapiens		2020-09-10
OB983304	B.1.131	ssRNA(+)	29903	United Kingdom:England	United Kingdom	Homo sapiens		2020-10-14
OB982239	B.1.131	ssRNA(+)	29903	United Kingdom:England	United Kingdom	Homo sapiens		2020-10-15
MW389622	B.1.134	ssRNA(+)	29860	USA: California	USA	Homo sapiens		2020-07-07
MW848051	B.1.137	ssRNA(+)	29833	USA: Pennsylvania	USA	Homo sapiens	oronasopharynx	2021-03-11
MZ363544	B.1.139	ssRNA(+)	29870	USA: Wisconsin, Milwaukee	USA	Homo sapiens	oronasopharynx	2020-04-01
MT706265	B.1.139	ssRNA(+)	29782	USA: Illinois, Winnebago county	USA	Homo sapiens	oronasopharynx	2020-04-09
MT706281	B.1.139	ssRNA(+)	29782	USA: Wisconsin, Dane County	USA	Homo sapiens	oronasopharynx	2020-04-09
MW700844	B.1.14	ssRNA(+)	29850	USA: CA, Santa Clara County	USA	Homo sapiens		2020-04-10
MW700846	B.1.14	ssRNA(+)	29809	USA: CA, Santa Clara County	USA	Homo sapiens		2020-04-10
MW700847	B.1.14	ssRNA(+)	29802	USA: CA, Santa Clara County	USA	Homo sapiens		2020-04-10
FR996276	B.1.142	ssRNA(+)	29782	United Kingdom:England	United Kingdom	Homo sapiens		2020-03-23
FR995662	B.1.142	ssRNA(+)	29849	United Kingdom:England	United Kingdom	Homo sapiens		2020-03-29
FR995931	B.1.142	ssRNA(+)	29782	United Kingdom:England	United Kingdom	Homo sapiens		2020-03-29
MT576035	B.1.143	ssRNA(+)	29800	India: Vadodara	India	Homo sapiens		2020-05-02
MT576037	B.1.143	ssRNA(+)	29800	India: Vadodara	India	Homo sapiens		2020-05-02
MT539165	B.1.143	ssRNA(+)	29800	India: Vadodara	India	Homo sapiens		2020-05-02
MT435086	B.1.145	ssRNA(+)	29800	India: Mansa	India	Homo sapiens		2020-04-21
MT467241	B.1.145	ssRNA(+)	29800	India: Ahmedabad	India	Homo sapiens		2020-04-26
MT467247	B.1.145	ssRNA(+)	29800	India: Ahmedabad	India	Homo sapiens		2020-04-29
OA979930	B.1.146	ssRNA(+)	29903	United Kingdom:England	United Kingdom	Homo sapiens		2020-07-05
MW332564	B.1.146	ssRNA(+)	29841	Bahrain	Bahrain	Homo sapiens		2020-11-11
MT304489	B.1.147	ssRNA(+)	29882	USA: TX	USA	Homo sapiens	oronasopharynx	2020-02-29
FR996747	B.1.147	ssRNA(+)	29782	United Kingdom:England	United Kingdom	Homo sapiens		2020-03-17
OA967097	B.1.147	ssRNA(+)	29903	United Kingdom:England	United Kingdom	Homo sapiens		2020-03-24
OA971386	B.1.149	ssRNA(+)	29903	United Kingdom:England	United Kingdom	Homo sapiens		2020-08-26
OA967860	B.1.149	ssRNA(+)	29903	United Kingdom:England	United Kingdom	Homo sapiens		2020-08-29
OA972841	B.1.149	ssRNA(+)	29903	United Kingdom:England	United Kingdom	Homo sapiens		2020-08-29
MW191335	B.1.151	ssRNA(+)	29782	USA: CA	USA	Homo sapiens		2020-03-15
FR998375	B.1.151	ssRNA(+)	29782	United Kingdom:Scotland	United Kingdom	Homo sapiens		2020-03-23
FR995045	B.1.151	ssRNA(+)	29782	United Kingdom:Northern Ireland	United Kingdom	Homo sapiens		2020-03-30
MZ331991	B.1.153	ssRNA(+)	29783	New Zealand	New Zealand	Homo sapiens		2020-03-23
FR994815	B.1.153	ssRNA(+)	29849	United Kingdom:England	United Kingdom	Homo sapiens		2020-04-01
MT511073	B.1.153	ssRNA(+)	29903	Poland	Poland	Homo sapiens		2020-04-01
LR884069	B.1.157	ssRNA(+)	29751	Spain	Spain	Homo sapiens		2020-03-08
LR884136	B.1.157	ssRNA(+)	29751	Spain	Spain	Homo sapiens		2020-03-17
MW483190	B.1.157	ssRNA(+)	29842	USA: CA, Santa Clara County	USA	Homo sapiens		2020-03-18
MT755916	B.1.159	ssRNA(+)	29880	Bangladesh: Barishal	Bangladesh	Homo sapiens	oronasopharynx	2020-07-06
OL601624	B.1.160	ssRNA(+)	29775	Nigeria: Oyo	Nigeria	Homo sapiens	oronasopharynx	2020-07-15
OA969337	B.1.160	ssRNA(+)	29903	United Kingdom:Northern Ireland	United Kingdom	Homo sapiens		2020-08-04
OA969275	B.1.160	ssRNA(+)	29903	United Kingdom:Northern Ireland	United Kingdom	Homo sapiens		2020-08-05
OB996515	B.1.160.10	ssRNA(+)	29903	United Kingdom:England	United Kingdom	Homo sapiens		2020-11-08
OC998476	B.1.160.10	ssRNA(+)	29903	United Kingdom:England	United Kingdom	Homo sapiens		2020-11-14
OD899729	B.1.160.10	ssRNA(+)	29903	United Kingdom:England	United Kingdom	Homo sapiens		2020-11-14
OD917792	B.1.160.12	ssRNA(+)	29903	United Kingdom:England	United Kingdom	Homo sapiens		2020-12-09
OU806851	B.1.160.16	ssRNA(+)	29875	United Kingdom:England	United Kingdom	Homo sapiens		2020-11-20
HG998421	B.1.160.20	ssRNA(+)	29903	United Kingdom:Oxford	United Kingdom	Homo sapiens		2020-12-01
MW778565	B.1.160.20	ssRNA(+)	29903	USA: Georgia	USA	Homo sapiens	oronasopharynx	2021-02-21
OA982208	B.1.160.23	ssRNA(+)	29903	United Kingdom:England	United Kingdom	Homo sapiens		2020-09-07
OA982500	B.1.160.23	ssRNA(+)	29903	United Kingdom:England	United Kingdom	Homo sapiens		2020-09-09
OA982895	B.1.160.23	ssRNA(+)	29903	United Kingdom:England	United Kingdom	Homo sapiens		2020-09-10
OD917581	B.1.160.26	ssRNA(+)	29903	United Kingdom:England	United Kingdom	Homo sapiens		2020-12-09
OB996776	B.1.160.26	ssRNA(+)	29903	United Kingdom:England	United Kingdom	Homo sapiens		2020-11-08
OB997762	B.1.160.26	ssRNA(+)	29903	United Kingdom:England	United Kingdom	Homo sapiens		2020-11-08
MZ646043	B.1.160.28	ssRNA(+)	29778	Germany: Cologne	Germany	Homo sapiens		2020-12-05
OB992227	B.1.160.33	ssRNA(+)	29891	United Kingdom:England	United Kingdom	Homo sapiens		2020-10-30
OB992592	B.1.160.33	ssRNA(+)	29891	United Kingdom:England	United Kingdom	Homo sapiens		2020-10-30
OD898461	B.1.160.33	ssRNA(+)	29891	United Kingdom:England	United Kingdom	Homo sapiens		2020-10-31
OU809725	B.1.160.7	ssRNA(+)	29889	United Kingdom:Wales	United Kingdom	Homo sapiens		2020-10-03
OU806958	B.1.160.7	ssRNA(+)	29890	United Kingdom:England	United Kingdom	Homo sapiens		2020-10-05
OA996359	B.1.160.7	ssRNA(+)	29891	United Kingdom:England	United Kingdom	Homo sapiens		2020-10-06
MZ668376	B.1.161	ssRNA(+)	29800	USA: North America, Oregon,Multnomah County	USA	Homo sapiens		2020-04-26
MZ668377	B.1.161	ssRNA(+)	29800	USA: North America, Oregon,Multnomah County	USA	Homo sapiens		2020-04-27
MZ616805	B.1.161	ssRNA(+)	29800	USA: North America, Oregon,Multnomah County	USA	Homo sapiens		2020-04-24
MW064556	B.1.162	ssRNA(+)	29782	USA: WI	USA	Homo sapiens		2020-03-19
MW064862	B.1.162	ssRNA(+)	29782	USA: WI	USA	Homo sapiens		2020-03-19
MW593244	B.1.162	ssRNA(+)	29798	USA: Washington	USA	Homo sapiens	oronasopharynx	2020-03-22
MT628125	B.1.163	ssRNA(+)	29866	USA: CA	USA	Homo sapiens		2020-03-16
MW190866	B.1.163	ssRNA(+)	29782	USA: CA	USA	Homo sapiens		2020-03-17
MW190841	B.1.163	ssRNA(+)	29782	USA: CA	USA	Homo sapiens		2020-03-18
OD899786	B.1.164	ssRNA(+)	29903	United Kingdom:England	United Kingdom	Homo sapiens		2020-11-13
MT612253	B.1.164	ssRNA(+)	29812	Australia: Victoria	Australia	Homo sapiens		2020-05-10
FR996712	B.1.165	ssRNA(+)	29782	United Kingdom:England	United Kingdom	Homo sapiens		2020-05-01
FR996721	B.1.165	ssRNA(+)	29782	United Kingdom:England	United Kingdom	Homo sapiens		2020-05-02
FR998798	B.1.165	ssRNA(+)	29782	United Kingdom:England	United Kingdom	Homo sapiens		2020-05-04
MT614510	B.1.166	ssRNA(+)	29779	USA: UT	USA	Homo sapiens		2020-03-12
MT334539	B.1.166	ssRNA(+)	29862	USA: UT	USA	Homo sapiens		2020-03-14
MT334540	B.1.166	ssRNA(+)	29901	USA: UT	USA	Homo sapiens		2020-03-14
FR993902	B.1.167	ssRNA(+)	29812	United Kingdom:England	United Kingdom	Homo sapiens		2020-03-27
FR995485	B.1.167	ssRNA(+)	29812	United Kingdom:England	United Kingdom	Homo sapiens		2020-04-02
OA964047	B.1.167	ssRNA(+)	29903	United Kingdom:England	United Kingdom	Homo sapiens		2020-05-01
OA964438	B.1.168	ssRNA(+)	29903	United Kingdom:Scotland	United Kingdom	Homo sapiens		2020-04-27
OA964450	B.1.168	ssRNA(+)	29903	United Kingdom:Scotland	United Kingdom	Homo sapiens		2020-04-29
OA964184	B.1.168	ssRNA(+)	29903	United Kingdom:Scotland	United Kingdom	Homo sapiens		2020-04-30
MT375436	B.1.169	ssRNA(+)	29852	USA: WA	USA	Homo sapiens		2020-03-31
MW190342	B.1.170	ssRNA(+)	29782	USA: CA	USA	Homo sapiens		2020-03-19
MT704084	B.1.170	ssRNA(+)	29845	USA: FL	USA	Homo sapiens		2020-05-04
MT834345	B.1.170	ssRNA(+)	29846	USA: Washington,Spokane County	USA	Homo sapiens		2020-06-02
OA971424	B.1.173	ssRNA(+)	29903	United Kingdom:England	United Kingdom	Homo sapiens		2020-05-16
OA980785	B.1.173	ssRNA(+)	29903	United Kingdom:England	United Kingdom	Homo sapiens		2020-06-02
OA981163	B.1.173	ssRNA(+)	29903	United Kingdom:England	United Kingdom	Homo sapiens		2020-06-02
MW426406	B.1.177	ssRNA(+)	29884	Tunisia	Tunisia	Homo sapiens	oronasopharynx	2020-03-16
MW346179	B.1.177	ssRNA(+)	29903	Tunisia	Tunisia	Homo sapiens	oronasopharynx	2020-03-18
MW680950	B.1.177	ssRNA(+)	29897	Tunisia	Tunisia	Homo sapiens	oronasopharynx	2020-03-24
OA994851	B.1.177.10	ssRNA(+)	29903	United Kingdom:England	United Kingdom	Homo sapiens		2020-09-02
OA982660	B.1.177.10	ssRNA(+)	29903	United Kingdom:England	United Kingdom	Homo sapiens		2020-09-03
OA994477	B.1.177.10	ssRNA(+)	29903	United Kingdom:England	United Kingdom	Homo sapiens		2020-09-04
OA984706	B.1.177.11	ssRNA(+)	29903	United Kingdom:Scotland	United Kingdom	Homo sapiens		2020-09-07
OA982283	B.1.177.11	ssRNA(+)	29903	United Kingdom:England	United Kingdom	Homo sapiens		2020-09-10
OA984806	B.1.177.11	ssRNA(+)	29903	United Kingdom:Scotland	United Kingdom	Homo sapiens		2020-09-13
HG997105	B.1.177.12	ssRNA(+)	29903	United Kingdom:Oxford	United Kingdom	Homo sapiens		2020-12-03
OA994826	B.1.177.14	ssRNA(+)	29903	United Kingdom:England	United Kingdom	Homo sapiens		2020-09-04
OA973346	B.1.177.15	ssRNA(+)	29903	United Kingdom:Wales	United Kingdom	Homo sapiens		2020-09-01
OA982973	B.1.177.15	ssRNA(+)	29903	United Kingdom:Wales	United Kingdom	Homo sapiens		2020-09-09
OA982974	B.1.177.15	ssRNA(+)	29903	United Kingdom:Wales	United Kingdom	Homo sapiens		2020-09-09
OA983168	B.1.177.16	ssRNA(+)	29903	United Kingdom:England	United Kingdom	Homo sapiens		2020-09-10
OA983198	B.1.177.16	ssRNA(+)	29903	United Kingdom:England	United Kingdom	Homo sapiens		2020-09-10
OA983200	B.1.177.16	ssRNA(+)	29903	United Kingdom:England	United Kingdom	Homo sapiens		2020-09-10
OU032165	B.1.177.17	ssRNA(+)	29848	United Kingdom:England	United Kingdom	Homo sapiens		2020-06-02
OA994516	B.1.177.17	ssRNA(+)	29903	United Kingdom:England	United Kingdom	Homo sapiens		2020-08-02
OA968221	B.1.177.17	ssRNA(+)	29903	United Kingdom:England	United Kingdom	Homo sapiens		2020-08-11
OA999046	B.1.177.18	ssRNA(+)	29903	United Kingdom:England	United Kingdom	Homo sapiens		2020-09-20
OA993712	B.1.177.18	ssRNA(+)	29903	United Kingdom:England	United Kingdom	Homo sapiens		2020-09-24
OA993510	B.1.177.18	ssRNA(+)	29903	United Kingdom:England	United Kingdom	Homo sapiens		2020-09-25
OA994527	B.1.177.19	ssRNA(+)	29903	United Kingdom:England	United Kingdom	Homo sapiens		2020-09-03
OA994748	B.1.177.19	ssRNA(+)	29903	United Kingdom:England	United Kingdom	Homo sapiens		2020-09-03
OA982487	B.1.177.19	ssRNA(+)	29903	United Kingdom:England	United Kingdom	Homo sapiens		2020-09-07
OA994528	B.1.177.2	ssRNA(+)	29903	United Kingdom:England	United Kingdom	Homo sapiens		2020-09-03
OA983792	B.1.177.2	ssRNA(+)	29903	United Kingdom:England	United Kingdom	Homo sapiens		2020-09-10
OU791993	B.1.177.2	ssRNA(+)	29865	United Kingdom:England	United Kingdom	Homo sapiens		2020-09-16
OA995157	B.1.177.20	ssRNA(+)	29903	United Kingdom:England	United Kingdom	Homo sapiens		2020-09-04
OA982596	B.1.177.20	ssRNA(+)	29903	United Kingdom:England	United Kingdom	Homo sapiens		2020-09-07
OA982989	B.1.177.20	ssRNA(+)	29903	United Kingdom:England	United Kingdom	Homo sapiens		2020-09-10
OB992930	B.1.177.21	ssRNA(+)	29903	United Kingdom:England	United Kingdom	Homo sapiens		2020-09-05
OB986605	B.1.177.21	ssRNA(+)	29903	United Kingdom:England	United Kingdom	Homo sapiens		2020-10-20
OB990266	B.1.177.21	ssRNA(+)	29903	United Kingdom:England	United Kingdom	Homo sapiens		2020-10-21
OA974508	B.1.177.23	ssRNA(+)	29903	United Kingdom:England	United Kingdom	Homo sapiens		2020-08-24
OA996440	B.1.177.24	ssRNA(+)	29903	United Kingdom:England	United Kingdom	Homo sapiens		2020-10-05
OU802426	B.1.177.26	ssRNA(+)	29865	United Kingdom:England	United Kingdom	Homo sapiens		2020-10-03
OU814584	B.1.177.26	ssRNA(+)	29865	United Kingdom:England	United Kingdom	Homo sapiens		2020-10-03
OU798909	B.1.177.26	ssRNA(+)	29850	United Kingdom:England	United Kingdom	Homo sapiens		2020-10-08
OA974496	B.1.177.3	ssRNA(+)	29903	United Kingdom:England	United Kingdom	Homo sapiens		2020-08-24
OA974242	B.1.177.3	ssRNA(+)	29903	United Kingdom:England	United Kingdom	Homo sapiens		2020-08-26
OA973680	B.1.177.3	ssRNA(+)	29903	United Kingdom:England	United Kingdom	Homo sapiens		2020-09-01
OD898515	B.1.177.30	ssRNA(+)	29903	United Kingdom:England	United Kingdom	Homo sapiens		2020-10-30
OB995266	B.1.177.30	ssRNA(+)	29903	United Kingdom:England	United Kingdom	Homo sapiens		2020-11-01
OD900604	B.1.177.30	ssRNA(+)	29903	United Kingdom:England	United Kingdom	Homo sapiens		2020-11-13
MZ054879	B.1.177.31	ssRNA(+)	29813	Libya	Libya	Homo sapiens	oronasopharynx	2021-02-25
OA971979	B.1.177.31	ssRNA(+)	29903	United Kingdom:England	United Kingdom	Homo sapiens		2020-08-24
OB982619	B.1.177.32	ssRNA(+)	29903	United Kingdom:England	United Kingdom	Homo sapiens		2020-10-15
OD899966	B.1.177.32	ssRNA(+)	29903	United Kingdom:England	United Kingdom	Homo sapiens		2020-11-13
OD901241	B.1.177.32	ssRNA(+)	29903	United Kingdom:England	United Kingdom	Homo sapiens		2020-11-13
OA990382	B.1.177.33	ssRNA(+)	29903	United Kingdom:England	United Kingdom	Homo sapiens		2020-09-20
OA990396	B.1.177.33	ssRNA(+)	29903	United Kingdom:England	United Kingdom	Homo sapiens		2020-09-20
OA991790	B.1.177.33	ssRNA(+)	29903	United Kingdom:England	United Kingdom	Homo sapiens		2020-09-29
OU814059	B.1.177.35	ssRNA(+)	29895	United Kingdom:England	United Kingdom	Homo sapiens		2021-01-13
OD932541	B.1.177.35	ssRNA(+)	29903	United Kingdom:England	United Kingdom	Homo sapiens		2021-01-04
OB981890	B.1.177.35	ssRNA(+)	29903	United Kingdom:England	United Kingdom	Homo sapiens		2020-10-17
OA983169	B.1.177.38	ssRNA(+)	29903	United Kingdom:England	United Kingdom	Homo sapiens		2020-09-11
OU032403	B.1.177.4	ssRNA(+)	29891	United Kingdom:England	United Kingdom	Homo sapiens		2020-06-03
OA972709	B.1.177.4	ssRNA(+)	29903	United Kingdom:England	United Kingdom	Homo sapiens		2020-09-02
OA994904	B.1.177.4	ssRNA(+)	29903	United Kingdom:England	United Kingdom	Homo sapiens		2020-09-07
OU810323	B.1.177.40	ssRNA(+)	29903	United Kingdom:England	United Kingdom	Homo sapiens
OD937091	B.1.177.41	ssRNA(+)	29903	United Kingdom:England	United Kingdom	Homo sapiens		2021-01-14
OD899000	B.1.177.41	ssRNA(+)	29903	United Kingdom:England	United Kingdom	Homo sapiens		2020-11-15
OA983464	B.1.177.43	ssRNA(+)	29903	United Kingdom:England	United Kingdom	Homo sapiens		2020-09-10
OD910697	B.1.177.43	ssRNA(+)	29903	United Kingdom:England	United Kingdom	Homo sapiens		2020-12-07
OD909607	B.1.177.43	ssRNA(+)	29903	United Kingdom:England	United Kingdom	Homo sapiens		2020-12-08
OA971210	B.1.177.44	ssRNA(+)	29903	United Kingdom:England	United Kingdom	Homo sapiens		2020-08-07
OA969105	B.1.177.44	ssRNA(+)	29903	United Kingdom:England	United Kingdom	Homo sapiens		2020-08-10
OA968232	B.1.177.44	ssRNA(+)	29903	United Kingdom:England	United Kingdom	Homo sapiens		2020-08-12
OU798624	B.1.177.46	ssRNA(+)	29903	United Kingdom:England	United Kingdom	Homo sapiens
OD939394	B.1.177.46	ssRNA(+)	29903	United Kingdom:England	United Kingdom	Homo sapiens		2021-01-12
MW638755	B.1.177.46	ssRNA(+)	29714	USA: New York	USA	Homo sapiens	oronasopharynx	2021-01-05
OD910955	B.1.177.47	ssRNA(+)	29903	United Kingdom:England	United Kingdom	Homo sapiens		2020-12-13
OD915834	B.1.177.47	ssRNA(+)	29903	United Kingdom:England	United Kingdom	Homo sapiens		2020-12-16
OD914729	B.1.177.47	ssRNA(+)	29903	United Kingdom:England	United Kingdom	Homo sapiens		2020-12-18
OA989640	B.1.177.48	ssRNA(+)	29903	United Kingdom:England	United Kingdom	Homo sapiens		2020-09-24
OA998393	B.1.177.48	ssRNA(+)	29903	United Kingdom:England	United Kingdom	Homo sapiens		2020-09-30
OB985451	B.1.177.48	ssRNA(+)	29903	United Kingdom:England	United Kingdom	Homo sapiens		2020-10-05
OB981753	B.1.177.5	ssRNA(+)	29903	United Kingdom:Scotland	United Kingdom	Homo sapiens		2020-09-04
OA984039	B.1.177.5	ssRNA(+)	29903	United Kingdom:Scotland	United Kingdom	Homo sapiens		2020-09-07
OB981700	B.1.177.5	ssRNA(+)	29903	United Kingdom:Scotland	United Kingdom	Homo sapiens		2020-09-07
OD905579	B.1.177.50	ssRNA(+)	29903	United Kingdom:England	United Kingdom	Homo sapiens		2020-10-14
OA996335	B.1.177.50	ssRNA(+)	29903	United Kingdom:England	United Kingdom	Homo sapiens		2020-10-06
OB982937	B.1.177.51	ssRNA(+)	29903	United Kingdom:England	United Kingdom	Homo sapiens		2020-10-13
OC996465	B.1.177.51	ssRNA(+)	29903	United Kingdom:England	United Kingdom	Homo sapiens		2020-11-05
OC997235	B.1.177.51	ssRNA(+)	29903	United Kingdom:England	United Kingdom	Homo sapiens		2020-11-05
OA975263	B.1.177.52	ssRNA(+)	29903	United Kingdom:England	United Kingdom	Homo sapiens		2020-08-18
OA974714	B.1.177.52	ssRNA(+)	29903	United Kingdom:England	United Kingdom	Homo sapiens		2020-08-25
OA994844	B.1.177.52	ssRNA(+)	29903	United Kingdom:England	United Kingdom	Homo sapiens		2020-09-08
OA969254	B.1.177.53	ssRNA(+)	29903	United Kingdom:England	United Kingdom	Homo sapiens		2020-08-03
OA969649	B.1.177.53	ssRNA(+)	29903	United Kingdom:England	United Kingdom	Homo sapiens		2020-08-03
OA974874	B.1.177.53	ssRNA(+)	29903	United Kingdom:England	United Kingdom	Homo sapiens		2020-08-09
OA982517	B.1.177.54	ssRNA(+)	29903	United Kingdom:England	United Kingdom	Homo sapiens		2020-09-07
OA994148	B.1.177.54	ssRNA(+)	29903	United Kingdom:England	United Kingdom	Homo sapiens		2020-09-14
OU811559	B.1.177.54	ssRNA(+)	29886	United Kingdom:England	United Kingdom	Homo sapiens		2020-09-16
OA983145	B.1.177.55	ssRNA(+)	29903	United Kingdom:England	United Kingdom	Homo sapiens		2020-09-10
OA982001	B.1.177.55	ssRNA(+)	29903	United Kingdom:England	United Kingdom	Homo sapiens		2020-09-16
OA982005	B.1.177.55	ssRNA(+)	29903	United Kingdom:England	United Kingdom	Homo sapiens		2020-09-16
OA970735	B.1.177.56	ssRNA(+)	29903	United Kingdom:Scotland	United Kingdom	Homo sapiens		2020-08-12
OA975243	B.1.177.56	ssRNA(+)	29903	United Kingdom:England	United Kingdom	Homo sapiens		2020-08-17
OA967774	B.1.177.56	ssRNA(+)	29903	United Kingdom:England	United Kingdom	Homo sapiens		2020-08-17
OU031579	B.1.177.57	ssRNA(+)	29903	United Kingdom:England	United Kingdom	Homo sapiens		2020-06-02
OU030604	B.1.177.57	ssRNA(+)	29903	United Kingdom:England	United Kingdom	Homo sapiens		2020-06-03
OU031804	B.1.177.57	ssRNA(+)	29903	United Kingdom:England	United Kingdom	Homo sapiens		2020-06-03
OA990328	B.1.177.58	ssRNA(+)	29903	United Kingdom:England	United Kingdom	Homo sapiens		2020-09-25
OA992346	B.1.177.58	ssRNA(+)	29903	United Kingdom:England	United Kingdom	Homo sapiens		2020-10-01
OA991159	B.1.177.58	ssRNA(+)	29903	United Kingdom:England	United Kingdom	Homo sapiens		2020-10-06
OD932056	B.1.177.59	ssRNA(+)	29903	United Kingdom:England	United Kingdom	Homo sapiens		2021-01-03
OA990430	B.1.177.6	ssRNA(+)	29903	United Kingdom:England	United Kingdom	Homo sapiens		2020-09-21
OA997521	B.1.177.6	ssRNA(+)	29903	United Kingdom:England	United Kingdom	Homo sapiens		2020-09-21
OA994043	B.1.177.6	ssRNA(+)	29903	United Kingdom:England	United Kingdom	Homo sapiens		2020-09-25
OA971106	B.1.177.60	ssRNA(+)	29903	United Kingdom:Scotland	United Kingdom	Homo sapiens		2020-08-17
OA970882	B.1.177.60	ssRNA(+)	29903	United Kingdom:Scotland	United Kingdom	Homo sapiens		2020-08-19
OA998701	B.1.177.60	ssRNA(+)	29903	United Kingdom:Scotland	United Kingdom	Homo sapiens		2020-09-27
OB995634	B.1.177.63	ssRNA(+)	29903	United Kingdom:Wales	United Kingdom	Homo sapiens		2020-10-24
OB995639	B.1.177.63	ssRNA(+)	29903	United Kingdom:Wales	United Kingdom	Homo sapiens		2020-10-24
OB995651	B.1.177.63	ssRNA(+)	29903	United Kingdom:Wales	United Kingdom	Homo sapiens		2020-10-24
OA969795	B.1.177.65	ssRNA(+)	29903	United Kingdom:Wales	United Kingdom	Homo sapiens		2020-08-06
OA973897	B.1.177.65	ssRNA(+)	29903	United Kingdom:England	United Kingdom	Homo sapiens		2020-08-24
OA973311	B.1.177.65	ssRNA(+)	29903	United Kingdom:England	United Kingdom	Homo sapiens		2020-09-01
OD920059	B.1.177.67	ssRNA(+)	29903	United Kingdom:England	United Kingdom	Homo sapiens		2020-12-20
OD927311	B.1.177.67	ssRNA(+)	29903	United Kingdom:England	United Kingdom	Homo sapiens		2020-12-14
OU812128	B.1.177.69	ssRNA(+)	29873	United Kingdom:England	United Kingdom	Homo sapiens		2020-09-16
OA997522	B.1.177.69	ssRNA(+)	29903	United Kingdom:England	United Kingdom	Homo sapiens		2020-09-21
OA993465	B.1.177.69	ssRNA(+)	29903	United Kingdom:England	United Kingdom	Homo sapiens		2020-09-24
OA975196	B.1.177.7	ssRNA(+)	29903	United Kingdom:Wales	United Kingdom	Homo sapiens		2020-08-18
OA975208	B.1.177.7	ssRNA(+)	29903	United Kingdom:Wales	United Kingdom	Homo sapiens		2020-08-18
OA975257	B.1.177.7	ssRNA(+)	29903	United Kingdom:Wales	United Kingdom	Homo sapiens		2020-08-18
HG999243	B.1.177.72	ssRNA(+)	29903	United Kingdom:Oxford	United Kingdom	Homo sapiens		2020-11-20
OK426693	B.1.177.73	ssRNA(+)	29724	New Zealand: Counties Manukau	New Zealand	Homo sapiens		2020-12-15
OD913619	B.1.177.73	ssRNA(+)	29903	United Kingdom:England	United Kingdom	Homo sapiens		2020-12-21
OD936461	B.1.177.73	ssRNA(+)	29903	United Kingdom:Scotland	United Kingdom	Homo sapiens		2020-12-22
OD906969	B.1.177.74	ssRNA(+)	29903	United Kingdom:England	United Kingdom	Homo sapiens		2020-12-10
OD912395	B.1.177.74	ssRNA(+)	29903	United Kingdom:England	United Kingdom	Homo sapiens		2020-12-11
OD919087	B.1.177.74	ssRNA(+)	29903	United Kingdom:England	United Kingdom	Homo sapiens		2020-12-13
OA994120	B.1.177.75	ssRNA(+)	29862	United Kingdom:England	United Kingdom	Homo sapiens		2020-09-24
OU803893	B.1.177.75	ssRNA(+)	29873	United Kingdom:England	United Kingdom	Homo sapiens		2020-10-29
OB995325	B.1.177.75	ssRNA(+)	29903	United Kingdom:England	United Kingdom	Homo sapiens		2020-11-01
OA974087	B.1.177.77	ssRNA(+)	29903	United Kingdom:England	United Kingdom	Homo sapiens		2020-08-26
OB996321	B.1.177.77	ssRNA(+)	29903	United Kingdom:Scotland	United Kingdom	Homo sapiens		2020-10-27
OD913008	B.1.177.77	ssRNA(+)	29903	United Kingdom:Scotland	United Kingdom	Homo sapiens		2020-12-05
OA994736	B.1.177.8	ssRNA(+)	29903	United Kingdom:England	United Kingdom	Homo sapiens		2020-09-03
OB981749	B.1.177.8	ssRNA(+)	29903	United Kingdom:Scotland	United Kingdom	Homo sapiens		2020-09-04
OA984045	B.1.177.8	ssRNA(+)	29903	United Kingdom:Scotland	United Kingdom	Homo sapiens		2020-09-07
MZ330784	B.1.177.80	ssRNA(+)	29858	Iraq	Iraq	Homo sapiens	oronasopharynx	2020-12-14
OA974606	B.1.177.81	ssRNA(+)	29903	United Kingdom:England	United Kingdom	Homo sapiens		2020-08-17
OA975490	B.1.177.81	ssRNA(+)	29903	United Kingdom:England	United Kingdom	Homo sapiens		2020-08-18
OA967678	B.1.177.81	ssRNA(+)	29903	United Kingdom:England	United Kingdom	Homo sapiens		2020-08-18
OA974315	B.1.177.82	ssRNA(+)	29903	United Kingdom:England	United Kingdom	Homo sapiens		2020-08-26
OA974378	B.1.177.82	ssRNA(+)	29903	United Kingdom:England	United Kingdom	Homo sapiens		2020-08-26
FR989642	B.1.177.82	ssRNA(+)	29903	United Kingdom:England	United Kingdom	Homo sapiens		2020-08-26
OA973089	B.1.177.83	ssRNA(+)	29903	United Kingdom:England	United Kingdom	Homo sapiens		2020-08-30
OA999116	B.1.177.83	ssRNA(+)	29903	United Kingdom:Scotland	United Kingdom	Homo sapiens		2020-09-22
OA999118	B.1.177.83	ssRNA(+)	29903	United Kingdom:Scotland	United Kingdom	Homo sapiens		2020-09-22
OA981672	B.1.177.84	ssRNA(+)	29903	United Kingdom:England	United Kingdom	Homo sapiens		2020-09-16
OA981962	B.1.177.84	ssRNA(+)	29903	United Kingdom:England	United Kingdom	Homo sapiens		2020-09-16
OA990324	B.1.177.84	ssRNA(+)	29903	United Kingdom:England	United Kingdom	Homo sapiens		2020-09-19
OB996807	B.1.177.85	ssRNA(+)	29903	United Kingdom:England	United Kingdom	Homo sapiens		2020-11-08
OC996808	B.1.177.85	ssRNA(+)	29903	United Kingdom:England	United Kingdom	Homo sapiens		2020-11-05
OU810765	B.1.177.86	ssRNA(+)	29898	United Kingdom:England	United Kingdom	Homo sapiens		2020-10-04
OU799960	B.1.177.86	ssRNA(+)	29899	United Kingdom:England	United Kingdom	Homo sapiens		2020-10-11
OU796817	B.1.177.86	ssRNA(+)	29903	United Kingdom:England	United Kingdom	Homo sapiens		2020-10-12
OA974730	B.1.177.87	ssRNA(+)	29903	United Kingdom:England	United Kingdom	Homo sapiens		2020-08-25
OA974325	B.1.177.87	ssRNA(+)	29903	United Kingdom:England	United Kingdom	Homo sapiens		2020-08-26
OA973695	B.1.177.87	ssRNA(+)	29903	United Kingdom:England	United Kingdom	Homo sapiens		2020-08-26
OA983433	B.1.177.9	ssRNA(+)	29903	United Kingdom:Wales	United Kingdom	Homo sapiens		2020-09-10
OA983517	B.1.177.9	ssRNA(+)	29903	United Kingdom:Wales	United Kingdom	Homo sapiens		2020-09-10
OA994288	B.1.177.9	ssRNA(+)	29903	United Kingdom:Wales	United Kingdom	Homo sapiens		2020-09-14
MT470106	B.1.178	ssRNA(+)	29903	France	France	Homo sapiens
OA981382	B.1.179	ssRNA(+)	29903	United Kingdom:England	United Kingdom	Homo sapiens		2020-05-22
OA981277	B.1.179	ssRNA(+)	29903	United Kingdom:England	United Kingdom	Homo sapiens		2020-05-25
OA976514	B.1.179	ssRNA(+)	29903	United Kingdom:England	United Kingdom	Homo sapiens		2020-06-11
OA972558	B.1.180	ssRNA(+)	29902	United Kingdom:England	United Kingdom	Homo sapiens		2020-09-03
OA972796	B.1.180	ssRNA(+)	29903	United Kingdom:England	United Kingdom	Homo sapiens		2020-07-30
MT946884	B.1.181	ssRNA(+)	29873	USA: Ak	USA	Homo sapiens		2020-05-27
MW079838	B.1.181	ssRNA(+)	29875	USA: Ak	USA	Homo sapiens	oronasopharynx	2020-05-31
MW079836	B.1.181	ssRNA(+)	29857	USA: Ak	USA	Homo sapiens	oronasopharynx	2020-06-01
MT846428	B.1.182	ssRNA(+)	29849	USA: FL	USA	Homo sapiens		2020-03-13
MT846429	B.1.182	ssRNA(+)	29863	USA: FL	USA	Homo sapiens		2020-03-13
MW828336	B.1.184	ssRNA(+)	29768	India	India	Homo sapiens	oronasopharynx	2020-05-22
MT953981	B.1.184	ssRNA(+)	29764	India: Gandhinagar	India	Homo sapiens		2020-06-18
MT953991	B.1.184	ssRNA(+)	29764	India: Gandhinagar	India	Homo sapiens		2020-06-22
MW273801	B.1.187	ssRNA(+)	29801	Poland	Poland	Homo sapiens		2020-03-28
MW273803	B.1.187	ssRNA(+)	29801	Poland	Poland	Homo sapiens		2020-03-29
MT511082	B.1.187	ssRNA(+)	29897	Poland	Poland	Homo sapiens		2020-04-01
MW593651	B.1.188	ssRNA(+)	29798	USA: Washington	USA	Homo sapiens	oronasopharynx	2020-07-26
MW474188	B.1.188	ssRNA(+)	29875	USA: Washington,Yakima County	USA	Homo sapiens		2020-08-15
MT997237	B.1.188	ssRNA(+)	29804	USA: Washington,King County	USA	Homo sapiens		2020-08-22
OK436128	B.1.189	ssRNA(+)	29844	Mexico	Mexico	Homo sapiens		2020-04-19
MZ643459	B.1.189	ssRNA(+)	29868	Mexico	Mexico	Homo sapiens		2020-04-19
OK435534	B.1.189	ssRNA(+)	29851	Mexico	Mexico	Homo sapiens		2020-04-20
LR883029	B.1.190	ssRNA(+)	29782	Netherlands:not collected	Netherlands	Homo sapiens		2020-03-13
LR883075	B.1.190	ssRNA(+)	29783	Netherlands:not collected	Netherlands	Homo sapiens		2020-03-17
LR883236	B.1.190	ssRNA(+)	29781	Netherlands:not collected	Netherlands	Homo sapiens		2020-03-18
MW815734	B.1.194	ssRNA(+)	29725	USA: TX	USA	Homo sapiens	oronasopharynx	2020-06-13
LR883798	B.1.195	ssRNA(+)	29777	Netherlands:not collected	Netherlands	Homo sapiens		2020-04-02
MT358637	B.1.195	ssRNA(+)	29903	India: Rajkot	India	Homo sapiens		2020-04-05
MW001902	B.1.195	ssRNA(+)	29882	USA	USA	Homo sapiens	oronasopharynx	2020-06-04
FR995443	B.1.198	ssRNA(+)	29804	United Kingdom:England	United Kingdom	Homo sapiens		2020-04-03
FR995367	B.1.198	ssRNA(+)	29857	United Kingdom:England	United Kingdom	Homo sapiens		2020-04-05
FR994384	B.1.198	ssRNA(+)	29782	United Kingdom:England	United Kingdom	Homo sapiens		2020-04-06
MT614523	B.1.199	ssRNA(+)	29782	USA: CA	USA	Homo sapiens		2020-03-16
MW190466	B.1.199	ssRNA(+)	29782	USA: ID	USA	Homo sapiens		2020-03-17
MW064560	B.1.199	ssRNA(+)	29782	USA: AR	USA	Homo sapiens		2020-03-18
MZ500923	B.1.2	ssRNA(+)	29817	USA: West Virginia	USA	Homo sapiens		2020-01-07
MZ500486	B.1.2	ssRNA(+)	29816	USA: West Virginia	USA	Homo sapiens		2020-01-20
MZ500330	B.1.2	ssRNA(+)	29823	USA: West Virginia	USA	Homo sapiens		2020-01-21
FR996778	B.1.201	ssRNA(+)	29782	United Kingdom:England	United Kingdom	Homo sapiens		2020-03-12
FR996589	B.1.201	ssRNA(+)	29812	United Kingdom:England	United Kingdom	Homo sapiens		2020-03-17
FR995628	B.1.201	ssRNA(+)	29782	United Kingdom:England	United Kingdom	Homo sapiens		2020-03-29
MW030227	B.1.205	ssRNA(+)	29520	Peru	Peru	Homo sapiens		2020-03-17
MW030261	B.1.205	ssRNA(+)	29520	Peru	Peru	Homo sapiens		2020-05-02
MW030266	B.1.205	ssRNA(+)	29520	Peru	Peru	Homo sapiens		2020-05-04
LR884062	B.1.206	ssRNA(+)	29751	Spain	Spain	Homo sapiens		2020-03-09
MW593773	B.1.206	ssRNA(+)	29798	USA: Washington	USA	Homo sapiens	oronasopharynx	2020-03-27
OU811968	B.1.206	ssRNA(+)	29866	United Kingdom:England	United Kingdom	Homo sapiens		2020-05-03
OU391419	B.1.208	ssRNA(+)	29899	United Kingdom:England	United Kingdom	Homo sapiens		2020-12-03
OU395906	B.1.208	ssRNA(+)	29902	United Kingdom:England	United Kingdom	Homo sapiens		2020-06-14
OD941485	B.1.208	ssRNA(+)	29899	United Kingdom:England	United Kingdom	Homo sapiens		2021-01-16
MW191501	B.1.210	ssRNA(+)	29798	India	India	Homo sapiens		2020-04-22
MW181804	B.1.210	ssRNA(+)	29814	India	India	Homo sapiens		2020-04-23
MW181805	B.1.210	ssRNA(+)	29832	India	India	Homo sapiens		2020-04-23
MT320538	B.1.211	ssRNA(+)	29882	France	France	Homo sapiens
MW273830	B.1.213	ssRNA(+)	29801	Poland	Poland	Homo sapiens		2020-05-10
MW273831	B.1.213	ssRNA(+)	29801	Poland	Poland	Homo sapiens		2020-05-10
MW273832	B.1.213	ssRNA(+)	29814	Poland	Poland	Homo sapiens		2020-05-10
MZ287360	B.1.214	ssRNA(+)	29819	Uganda	Uganda	Homo sapiens	oronasopharynx	2020-10-22
OD913695	B.1.214.2	ssRNA(+)	29871	United Kingdom:England	United Kingdom	Homo sapiens		2020-12-05
OD959781	B.1.214.2	ssRNA(+)	29871	United Kingdom:England	United Kingdom	Homo sapiens		2020-12-17
OD922427	B.1.214.2	ssRNA(+)	29871	United Kingdom:England	United Kingdom	Homo sapiens		2020-12-29
FR998445	B.1.215	ssRNA(+)	29782	United Kingdom:Scotland	United Kingdom	Homo sapiens		2020-03-23
FR998384	B.1.215	ssRNA(+)	29782	United Kingdom:Scotland	United Kingdom	Homo sapiens		2020-03-24
OA965993	B.1.215	ssRNA(+)	29784	United Kingdom:Scotland	United Kingdom	Homo sapiens		2020-03-27
OA973945	B.1.218	ssRNA(+)	29903	United Kingdom:England	United Kingdom	Homo sapiens		2020-08-20
OA974513	B.1.218	ssRNA(+)	29903	United Kingdom:England	United Kingdom	Homo sapiens		2020-08-25
OA974131	B.1.218	ssRNA(+)	29903	United Kingdom:England	United Kingdom	Homo sapiens		2020-08-27
LR883856	B.1.219	ssRNA(+)	29781	Netherlands:not collected	Netherlands	Homo sapiens		2020-04-05
LR878350	B.1.22	ssRNA(+)	29773	Netherlands:not collected	Netherlands	Homo sapiens		2020-03-09
LR878352	B.1.22	ssRNA(+)	29774	Netherlands:not collected	Netherlands	Homo sapiens		2020-03-09
LR883768	B.1.22	ssRNA(+)	29780	Netherlands:not collected	Netherlands	Homo sapiens		2020-03-10
LR877794	B.1.220	ssRNA(+)	29779	Netherlands:ZuidHolland	Netherlands	Homo sapiens		2020-03-23
LR877912	B.1.220	ssRNA(+)	29781	Netherlands:not collected	Netherlands	Homo sapiens		2020-03-26
LR878028	B.1.220	ssRNA(+)	29779	Netherlands:ZuidHolland	Netherlands	Homo sapiens		2020-03-31
OA969393	B.1.221	ssRNA(+)	29903	United Kingdom:England	United Kingdom	Homo sapiens		2020-08-03
OA969395	B.1.221	ssRNA(+)	29903	United Kingdom:England	United Kingdom	Homo sapiens		2020-08-03
OA969544	B.1.221	ssRNA(+)	29903	United Kingdom:England	United Kingdom	Homo sapiens		2020-08-06
OA975222	B.1.221.1	ssRNA(+)	29903	United Kingdom:England	United Kingdom	Homo sapiens		2020-08-18
OA975223	B.1.221.1	ssRNA(+)	29903	United Kingdom:England	United Kingdom	Homo sapiens		2020-08-18
OA975268	B.1.221.1	ssRNA(+)	29903	United Kingdom:Wales	United Kingdom	Homo sapiens		2020-08-18
OD941755	B.1.221.2	ssRNA(+)	29903	United Kingdom:England	United Kingdom	Homo sapiens		2021-01-15
OD906430	B.1.221.2	ssRNA(+)	29903	United Kingdom:England	United Kingdom	Homo sapiens		2020-12-10
OA966200	B.1.222	ssRNA(+)	29782	United Kingdom:Scotland	United Kingdom	Homo sapiens		2020-03-19
FR998372	B.1.222	ssRNA(+)	29782	United Kingdom:Scotland	United Kingdom	Homo sapiens		2020-03-23
FR998395	B.1.222	ssRNA(+)	29782	United Kingdom:Scotland	United Kingdom	Homo sapiens		2020-03-23
OA966193	B.1.223	ssRNA(+)	29782	United Kingdom:Scotland	United Kingdom	Homo sapiens		2020-03-17
FR996540	B.1.223	ssRNA(+)	29845	United Kingdom:England	United Kingdom	Homo sapiens		2020-03-20
FR996460	B.1.223	ssRNA(+)	29812	United Kingdom:England	United Kingdom	Homo sapiens		2020-03-22
OU807900	B.1.225	ssRNA(+)	29873	United Kingdom:England	United Kingdom	Homo sapiens		2020-04-08
OU814198	B.1.225	ssRNA(+)	29903	United Kingdom:England	United Kingdom	Homo sapiens		2020-04-08
OU793569	B.1.225	ssRNA(+)	29866	United Kingdom:England	United Kingdom	Homo sapiens		2020-04-13
FR996500	B.1.229	ssRNA(+)	29812	United Kingdom:England	United Kingdom	Homo sapiens		2020-03-21
FR995948	B.1.229	ssRNA(+)	29849	United Kingdom:England	United Kingdom	Homo sapiens		2020-03-30
FR995291	B.1.229	ssRNA(+)	29849	United Kingdom:England	United Kingdom	Homo sapiens		2020-04-01
MT451183	B.1.23	ssRNA(+)	29816	Australia: Victoria	Australia	Homo sapiens		2020-03-22
MT451358	B.1.23	ssRNA(+)	29804	Australia: Victoria	Australia	Homo sapiens		2020-03-23
OK426919	B.1.23	ssRNA(+)	29782	New Zealand: Canterbury	New Zealand	Homo sapiens		2020-03-24
OA976832	B.1.231	ssRNA(+)	29903	United Kingdom:England	United Kingdom	Homo sapiens		2020-06-09
OA976266	B.1.231	ssRNA(+)	29903	United Kingdom:England	United Kingdom	Homo sapiens		2020-06-09
OA976295	B.1.231	ssRNA(+)	29903	United Kingdom:England	United Kingdom	Homo sapiens		2020-06-09
OA964108	B.1.232	ssRNA(+)	29903	United Kingdom:Scotland	United Kingdom	Homo sapiens		2020-04-06
OA964305	B.1.232	ssRNA(+)	29903	United Kingdom:Scotland	United Kingdom	Homo sapiens		2020-04-06
OA964312	B.1.232	ssRNA(+)	29903	United Kingdom:Scotland	United Kingdom	Homo sapiens		2020-04-08
MZ544833	B.1.233	ssRNA(+)	29860	USA: AZ, Pima	USA	Homo sapiens	oronasopharynx	2020-08-13
MW861360	B.1.233	ssRNA(+)	29782	USA: Montana	USA	Homo sapiens		2020-06-29
MW474192	B.1.233	ssRNA(+)	29833	USA: Washington,King County	USA	Homo sapiens		2020-08-17
LR883501	B.1.234	ssRNA(+)	27366	Netherlands:not collected	Netherlands	Homo sapiens		2020-04-14
MZ503997	B.1.234	ssRNA(+)	29832	USA: AZ, Maricopa	USA	Homo sapiens	oronasopharynx	2020-06-21
MZ503998	B.1.234	ssRNA(+)	29833	USA: AZ, Maricopa	USA	Homo sapiens	oronasopharynx	2020-06-21
OA976186	B.1.235	ssRNA(+)	29903	United Kingdom:England	United Kingdom	Homo sapiens		2020-06-08
OA977358	B.1.235	ssRNA(+)	29903	United Kingdom:England	United Kingdom	Homo sapiens		2020-06-10
OA977367	B.1.235	ssRNA(+)	29903	United Kingdom:England	United Kingdom	Homo sapiens		2020-06-10
MT968058	B.1.236	ssRNA(+)	29882	USA	USA	Homo sapiens	oronasopharynx	2020-07-03
MT843749	B.1.236	ssRNA(+)	29882	USA	USA	Homo sapiens	oronasopharynx	2020-07-08
OA979400	B.1.236	ssRNA(+)	29903	United Kingdom:England	United Kingdom	Homo sapiens		2020-07-16
OA970437	B.1.238	ssRNA(+)	29903	United Kingdom:England	United Kingdom	Homo sapiens		2020-05-14
OA981197	B.1.238	ssRNA(+)	29903	United Kingdom:England	United Kingdom	Homo sapiens		2020-06-01
OA976631	B.1.238	ssRNA(+)	29903	United Kingdom:England	United Kingdom	Homo sapiens		2020-06-07
OK548937	B.1.239	ssRNA(+)	29598	Mexico: Baja California,Tijuana	Mexico	Homo sapiens	oronasopharynx	2020-04-09
OK549000	B.1.239	ssRNA(+)	29598	Mexico: Baja California,Tijuana	Mexico	Homo sapiens	oronasopharynx	2020-05-01
MT811303	B.1.239	ssRNA(+)	29409	USA: San Diego, California	USA	Homo sapiens	oronasopharynx	2020-05-01
MT371002	B.1.240	ssRNA(+)	29710	USA: NY	USA	Homo sapiens	oronasopharynx	2020-03-22
OA967406	B.1.240	ssRNA(+)	29903	United Kingdom:England	United Kingdom	Homo sapiens		2020-04-07
OK549221	B.1.240	ssRNA(+)	29598	Mexico: Baja California,Mexicali	Mexico	Homo sapiens	oronasopharynx	2020-05-14
OA989694	B.1.240.2	ssRNA(+)	29903	United Kingdom:England	United Kingdom	Homo sapiens		2020-09-24
OA992477	B.1.240.2	ssRNA(+)	29903	United Kingdom:England	United Kingdom	Homo sapiens		2020-09-28
OB985494	B.1.240.2	ssRNA(+)	29903	United Kingdom:England	United Kingdom	Homo sapiens		2020-10-07
OK549156	B.1.241	ssRNA(+)	29598	Mexico: Baja California,Tijuana	Mexico	Homo sapiens	oronasopharynx	2020-04-17
MT810782	B.1.241	ssRNA(+)	29409	Mexico: Tijuana, BajaCalifornia	Mexico	Homo sapiens	oronasopharynx	2020-04-20
MT810776	B.1.241	ssRNA(+)	29409	Mexico: Tijuana, BajaCalifornia	Mexico	Homo sapiens	oronasopharynx	2020-04-22
MT810519	B.1.243	ssRNA(+)	29409	USA: San Diego, California	USA	Homo sapiens	oronasopharynx	2020-03-23
MT811318	B.1.243	ssRNA(+)	29409	USA: San Diego, California	USA	Homo sapiens	oronasopharynx	2020-03-27
MT810555	B.1.243	ssRNA(+)	29409	USA: San Diego, California	USA	Homo sapiens	oronasopharynx	2020-03-30
MW820260	B.1.243.1	ssRNA(+)	29764	USA: New Mexico	USA	Homo sapiens	oronasopharynx	2021-03-08
MT810987	B.1.245	ssRNA(+)	29409	USA: San Diego, California	USA	Homo sapiens	oronasopharynx	2020-04-05
MT811204	B.1.245	ssRNA(+)	29409	USA: San Diego, California	USA	Homo sapiens	oronasopharynx	2020-04-15
MT811256	B.1.245	ssRNA(+)	29409	USA: San Diego, California	USA	Homo sapiens	oronasopharynx	2020-04-15
MT467261	B.1.247	ssRNA(+)	29800	India: Modasa	India	Homo sapiens		2020-05-04
MT467262	B.1.247	ssRNA(+)	29800	India: Modasa	India	Homo sapiens		2020-05-04
MT481897	B.1.247	ssRNA(+)	29800	India: Modasa	India	Homo sapiens		2020-05-05
OA966294	B.1.248	ssRNA(+)	29782	United Kingdom:Scotland	United Kingdom	Homo sapiens		2020-03-28
OA966306	B.1.248	ssRNA(+)	29782	United Kingdom:Scotland	United Kingdom	Homo sapiens		2020-03-29
FR998214	B.1.248	ssRNA(+)	29782	United Kingdom:Scotland	United Kingdom	Homo sapiens		2020-04-07
FR999894	B.1.249	ssRNA(+)	29784	United Kingdom:England	United Kingdom	Homo sapiens		2020-06-01
FR999904	B.1.249	ssRNA(+)	29782	United Kingdom:England	United Kingdom	Homo sapiens		2020-06-02
OA976831	B.1.249	ssRNA(+)	29903	United Kingdom:England	United Kingdom	Homo sapiens		2020-06-14
FR995137	B.1.250	ssRNA(+)	29842	United Kingdom:England	United Kingdom	Homo sapiens		2020-04-03
FR995154	B.1.250	ssRNA(+)	29849	United Kingdom:England	United Kingdom	Homo sapiens		2020-04-03
FR995174	B.1.250	ssRNA(+)	29782	United Kingdom:England	United Kingdom	Homo sapiens		2020-04-03
OA981186	B.1.251	ssRNA(+)	29903	United Kingdom:England	United Kingdom	Homo sapiens		2020-06-01
OA980764	B.1.251	ssRNA(+)	29903	United Kingdom:England	United Kingdom	Homo sapiens		2020-06-02
OA981135	B.1.251	ssRNA(+)	29903	United Kingdom:England	United Kingdom	Homo sapiens		2020-06-02
OA966283	B.1.252	ssRNA(+)	29782	United Kingdom:Scotland	United Kingdom	Homo sapiens		2020-03-28
OA969438	B.1.252	ssRNA(+)	29903	United Kingdom:England	United Kingdom	Homo sapiens		2020-05-18
OA976797	B.1.252	ssRNA(+)	29903	United Kingdom:England	United Kingdom	Homo sapiens		2020-06-10
FR994690	B.1.254	ssRNA(+)	29812	United Kingdom:England	United Kingdom	Homo sapiens		2020-04-06
OA966183	B.1.254	ssRNA(+)	29903	United Kingdom:Scotland	United Kingdom	Homo sapiens		2020-04-12
OA966175	B.1.254	ssRNA(+)	29903	United Kingdom:Scotland	United Kingdom	Homo sapiens		2020-04-13
OA966213	B.1.256	ssRNA(+)	29782	United Kingdom:Scotland	United Kingdom	Homo sapiens		2020-03-22
OA967217	B.1.256	ssRNA(+)	29782	United Kingdom:Scotland	United Kingdom	Homo sapiens		2020-03-26
OA966330	B.1.256	ssRNA(+)	29782	United Kingdom:Scotland	United Kingdom	Homo sapiens		2020-03-27
MZ047270	B.1.258	ssRNA(+)	29903	Poland	Poland	Homo sapiens		2020-01-20
MZ047087	B.1.258	ssRNA(+)	29897	Poland	Poland	Homo sapiens	oronasopharynx	2020-03-15
OA971806	B.1.258	ssRNA(+)	29782	United Kingdom:England	United Kingdom	Homo sapiens		2020-03-25
OB981808	B.1.258.10	ssRNA(+)	29897	United Kingdom:Scotland	United Kingdom	Homo sapiens		2020-09-17
OA997561	B.1.258.10	ssRNA(+)	29897	United Kingdom:Scotland	United Kingdom	Homo sapiens		2020-09-21
OA997570	B.1.258.10	ssRNA(+)	29897	United Kingdom:Scotland	United Kingdom	Homo sapiens		2020-09-21
OL980611	B.1.258.11	ssRNA(+)	29882	Hong Kong	Hong Kong	Homo sapiens
OD923807	B.1.258.11	ssRNA(+)	29897	United Kingdom:England	United Kingdom	Homo sapiens		2020-12-24
HG998679	B.1.258.11	ssRNA(+)	29897	United Kingdom:Oxford	United Kingdom	Homo sapiens		2020-12-22
OU813469	B.1.258.12	ssRNA(+)	29897	United Kingdom:England	United Kingdom	Homo sapiens		2020-10-04
OA996585	B.1.258.12	ssRNA(+)	29897	United Kingdom:England	United Kingdom	Homo sapiens		2020-10-04
OA990932	B.1.258.12	ssRNA(+)	29897	United Kingdom:England	United Kingdom	Homo sapiens		2020-10-06
OC997406	B.1.258.14	ssRNA(+)	29903	United Kingdom:England	United Kingdom	Homo sapiens		2020-11-05
OB982490	B.1.258.14	ssRNA(+)	29903	United Kingdom:England	United Kingdom	Homo sapiens		2020-10-14
MW473692	B.1.258.17	ssRNA(+)	29897	USA	USA	Homo sapiens	oronasopharynx	2020-12-15
OD959787	B.1.258.17	ssRNA(+)	29897	United Kingdom:England	United Kingdom	Homo sapiens		2020-12-16
OD928248	B.1.258.17	ssRNA(+)	29896	United Kingdom:England	United Kingdom	Homo sapiens		2021-01-02
OA980118	B.1.258.2	ssRNA(+)	29903	United Kingdom:England	United Kingdom	Homo sapiens		2020-07-03
OA979938	B.1.258.2	ssRNA(+)	29903	United Kingdom:England	United Kingdom	Homo sapiens		2020-07-05
OA979913	B.1.258.2	ssRNA(+)	29903	United Kingdom:England	United Kingdom	Homo sapiens		2020-07-06
OD942149	B.1.258.20	ssRNA(+)	29893	United Kingdom:England	United Kingdom	Homo sapiens		2021-01-14
MW453084	B.1.258.21	ssRNA(+)	29826	Morocco	Morocco	Homo sapiens
OD927883	B.1.258.22	ssRNA(+)	29897	United Kingdom:England	United Kingdom	Homo sapiens		2021-01-02
OD905314	B.1.258.22	ssRNA(+)	29903	United Kingdom:England	United Kingdom	Homo sapiens		2020-11-26
MW505066	B.1.258.23	ssRNA(+)	29810	USA	USA	Homo sapiens		2020-12-19
MW562715	B.1.258.23	ssRNA(+)	29898	USA	USA	Homo sapiens		2020-12-28
MW562721	B.1.258.23	ssRNA(+)	29898	USA	USA	Homo sapiens		2020-12-28
[truncated: 1,353 more rows]
